# Supplementary material for: Catalytic exploration of NHC–Ag(i)HMDS complexes for the hydroboration and hydrosilylation of carbonyl compounds
Source: Royal Society of Chemistry journal article supplement (doi:10.1039/d3dt01042b), 2023-01-01
Supplement: d3dt01042b1.pdf [file d3dt01042b1.pdf]

# **Catalytic exploration of NHC-Ag(I)-HMDS complexes for the hydroboration and hydrosilylation of carbonyl compounds**

Claudia P. Giarrusso, Daniel Van Zeil, and Victoria L. Blair\*<sup>[a]</sup>

## **Supporting Information**

## Table of Contents

|                                                                                          |           |
|------------------------------------------------------------------------------------------|-----------|
| <b>Experimental</b> .....                                                                | <b>5</b>  |
| <i>General Experimental</i> .....                                                        | 5         |
| <i>X-ray Crystallography</i> .....                                                       | 5         |
| <i>General catalytic protocol</i> .....                                                  | 5         |
| <i>Hydrosilylation reactions work up:</i> .....                                          | 6         |
| <i>Synthesis of NHC-Ag(I)HMDS pre-catalysts</i> .....                                    | 6         |
| <i>Synthesis and characterisation of Ag(IDipp)Cl 1:</i> .....                            | 6         |
| <i>Synthesis and characterisation of 1,3-bis(1-adamantyl)imidazol-2-ylidene 2:</i> ..... | 7         |
| <i>Synthesis and characterisation of [Ag(IDipp)HMDS], 3</i> .....                        | 8         |
| <i>Synthesis and characterisation of [Ag(IAd)HMDS], 4</i> .....                          | 10        |
| <b>Light experiments</b> .....                                                           | <b>11</b> |
| <i>[Ag(IDipp)HMDS] 3:</i> .....                                                          | 11        |
| .....                                                                                    | 11        |
| <i>[Ag(IAd)HMDS] 4:</i> .....                                                            | 13        |
| <i>[Ag(PCy<sub>3</sub>)HMDS] 5:</i> .....                                                | 14        |
| <b>X-ray crystallography data</b> .....                                                  | <b>15</b> |
| <b>Catalytic hydroboration using 3</b> .....                                             | <b>16</b> |
| 1a, Benzaldehyde.....                                                                    | 17        |
| 2a, 4-Br-Benzaldehyde.....                                                               | 18        |
| 3a, 4-CN-Benzaldehyde.....                                                               | 19        |
| 4a, 2-CF <sub>3</sub> -Benzaldehyde.....                                                 | 20        |
| 5a, 3-OMe-Benzaldehyde.....                                                              | 21        |
| 6a, Mesitaldehyde.....                                                                   | 22        |
| 7a, tButylaldehyde.....                                                                  | 23        |
| 8a, Acetophenone.....                                                                    | 24        |
| 9a, Benzophenone.....                                                                    | 25        |
| 10a, 2,2,2-Trifluoroacetophenone.....                                                    | 26        |
| 11a, 4-Iodoacetophenone.....                                                             | 27        |
| 12a, 4-NO <sub>2</sub> -Acetophenone.....                                                | 28        |
| 13a, 9-Fluorenone.....                                                                   | 29        |
| 14a, Cyclopentanone.....                                                                 | 30        |
| <b>Catalytic hydrosilylation using 3</b> .....                                           | <b>31</b> |
| 1b, Benzaldehyde.....                                                                    | 32        |
| 2b, 4-Br-Benzaldehyde.....                                                               | 33        |
| 3b, 4-CN-Benzaldehyde.....                                                               | 35        |
| 4b, 2-CF <sub>3</sub> -Benzaldehyde.....                                                 | 37        |
| 5b, 3-OMe-Benzaldehyde.....                                                              | 39        |
| 6b, Mesitaldehyde.....                                                                   | 40        |
| 7b, tButylaldehyde.....                                                                  | 41        |
| 8b, Acetophenone.....                                                                    | 42        |
| 9b, Benzophenone.....                                                                    | 43        |
| 10b, 2,2,2-Trifluoroacetophenone.....                                                    | 44        |
| 11b, 4-Iodoacetophenone.....                                                             | 46        |

|                                                                 |           |
|-----------------------------------------------------------------|-----------|
| 12b, 4-NO <sub>2</sub> -Acetophenone .....                      | 47        |
| 13b, 9-Fluorenone .....                                         | 49        |
| 14b, Cyclopentanone .....                                       | 50        |
| <b>Catalytic hydroboration using 4 .....</b>                    | <b>51</b> |
| 1a, Benzaldehyde .....                                          | 52        |
| 2a, 4-Br-Benzaldehyde .....                                     | 53        |
| 3a, 4-CN-Benzaldehyde .....                                     | 54        |
| 4a, 2-CF <sub>3</sub> -Benzaldehyde.....                        | 55        |
| 5a, 3-OMe-Benzaldehyde .....                                    | 56        |
| 6a, Mesitaldehyde .....                                         | 57        |
| 7a, tButylaldehyde .....                                        | 58        |
| 8a, Acetophenone .....                                          | 59        |
| 9a, Benzophenone.....                                           | 60        |
| 10a, 2,2,2-Trifluoroacetophenone .....                          | 61        |
| 11a, 4-Iodoacetophenone .....                                   | 62        |
| 12a, 4-NO <sub>2</sub> -Acetophenone .....                      | 63        |
| 13a, 9-Fluorenone .....                                         | 64        |
| 14a, Cyclopentanone.....                                        | 65        |
| <b>Catalytic hydrosilylation using 4 .....</b>                  | <b>66</b> |
| 1b, Benzaldehyde .....                                          | 67        |
| 2b, 4-Br-Benzaldehyde .....                                     | 68        |
| 3b, 4-CN-Benzaldehyde .....                                     | 70        |
| 4b, 2-CF <sub>3</sub> -Benzaldehyde .....                       | 72        |
| 5b, 3-OMe-Benzaldehyde.....                                     | 74        |
| 6b, Mesitaldehyde.....                                          | 75        |
| 7b, tButylaldehyde .....                                        | 77        |
| 8b, Acetophenone .....                                          | 78        |
| 9b, Benzophenone .....                                          | 79        |
| 10b, 2,2,2-Trifluoroacetophenone .....                          | 80        |
| 11b, 4-Iodoacetophenone .....                                   | 82        |
| 12b, 4-NO <sub>2</sub> -Acetophenone .....                      | 83        |
| 13b, 9-Fluorenone .....                                         | 85        |
| 14b, Cyclopentanone .....                                       | 86        |
| <b>Proposed catalytic cycle .....</b>                           | <b>87</b> |
| .....                                                           | <b>87</b> |
| <b>Reusability studies of pre-catalyst 3 .....</b>              | <b>88</b> |
| <i>General catalytic protocol for reusability study .....</i>   | <i>88</i> |
| <b>Hydroboration reusability cycles .....</b>                   | <b>89</b> |
| <i>Benzaldehyde .....</i>                                       | <i>89</i> |
| <i>2,2,2-trifluoroacetophenone .....</i>                        | <i>90</i> |
| <b>Hydrosilylation reusability cycles.....</b>                  | <b>91</b> |
| <i>Benzaldehyde .....</i>                                       | <i>91</i> |
| <i>2,2,2-trifluoroacetophenone .....</i>                        | <i>92</i> |
| <b>Isolation of alcohol product from reusability study.....</b> | <b>93</b> |
| <i>Benzaldehyde, HBpin:.....</i>                                | <i>93</i> |

|                                                           |           |
|-----------------------------------------------------------|-----------|
| .....                                                     | 93        |
| <i>Benzaldehyde, Ph<sub>2</sub>SiH<sub>2</sub>:</i> ..... | 93        |
| <b>2D steric mapping</b> .....                            | <b>94</b> |
| <i>Percent buried volume (%V<sub>Bur</sub>)</i> .....     | 94        |
| .....                                                     | 94        |
| .....                                                     | 95        |
| <b>3D steric mapping</b> .....                            | <b>96</b> |
| <i>AtomAccess</i> .....                                   | 96        |
| .....                                                     | 96        |
| .....                                                     | 97        |
| <b>G-parameter</b> .....                                  | <b>98</b> |
| <b>References</b> .....                                   | <b>99</b> |

# Experimental

## General Experimental

Unless specified all reactions and manipulations were carried out under a protective nitrogen atmosphere using either standard Schlenk techniques or an MBraun glove box fitted with a gas purification and recirculation unit. NMR measurements were conducted in either a standard NMR tube or clear/amber J. Youngs tube oven dried and flushed with nitrogen prior to use. NMR spectra were recorded in C<sub>6</sub>D<sub>6</sub>, CDCl<sub>3</sub> or (CD<sub>3</sub>)<sub>2</sub>SO on a Bruker DRX400 NMR spectrometer operating at 400 MHz for proton and 100 MHz for carbon nuclei, or Bruker DRX600 NMR spectrometer operating at 600 MHz for proton and 150 MHz for carbon nuclei. NMR data recorded as follows: chemical shift ( $\delta$ ) [multiplicity, coupling constant(s) J (Hz), relative integral], where multiplicity is defined: s = singlet, d = doublet, t = triplet, q = quartet, m = multiplet or combinations thereof, and prefixed br = broad. Solvents were obtained from an MBraun SPS-800 solvent purification system and stored over 4 Å molecular sieves under a nitrogen atmosphere. Pentane was refluxed and dried over Na turnings and stored over 4 Å molecular sieves under nitrogen. All reagents and substrates were purchased commercially from Sigma Aldrich, Oakwood Chemicals, Merck or Alfa-Aesar and used as received without any further purification.

## X-ray Crystallography

Crystallographic data for compounds **3** and **4** were collected on the OXFORD XtaLAB Synergy, Dualflex, HyPix diffractometer equipped with an OXFORD Cryosystems 700 Cryostream and cooled to 123(1) K. Data was collected with MoK $\alpha$  radiation ( $\lambda = 0.71070$  Å) and processed using the CrysAlisPro v 1.171.40.49a software.<sup>1</sup> Each compound was solved and refined using SHELX-2016 utilising the graphical interface Olex2.<sup>2, 3</sup> Refinement was achieved by using the full matrix least-squares technique on F<sup>2</sup>, which minimises the function given by (Fo-Fc)<sup>2</sup>, where Fo and Fc are the observed and calculated structure amplitudes respectively, given that the weight is defined as 4Fo<sup>2</sup>/2Fo<sup>2</sup>. Unless otherwise indicated, all non-hydrogen atoms were refined with anisotropic thermal parameters. Hydrogen atoms were placed in calculated positions using a riding model with C-H = 0.95–0.98 Å and Uiso(H) = xUiso(C), x = 1.2 or 1.5 unless otherwise indicated. Selected crystallographic details and refinements are provided in Table S1, page 13. CCDC 2218138 and 2218137 contains the supplementary crystallographic data for these structures. This data can be obtained free of charge from the Cambridge Crystallographic Data Centre via [www.ccdc.cam.ac.uk/data\\_request/cif](http://www.ccdc.cam.ac.uk/data_request/cif).

## General catalytic protocol

In a typical procedure, the substrate (0.5 mmol) was added to an amber J. Youngs NMR tube and dissolved in C<sub>6</sub>D<sub>6</sub> (0.5 mL) containing 10 mol % of the internal reference standard hexamethylcyclotrisiloxane and the <sup>1</sup>H NMR data recorded. Pinacolborane (0.6 mmol, 90  $\mu$ L) or diphenylsilane (0.75 mmol, 93  $\mu$ L) and catalyst **3** or **4** (5 mol %, 1 M, 50  $\mu$ L) was then added and the reaction monitored by <sup>1</sup>H and/or <sup>11</sup>B NMR spectroscopy until completion. For hydrosilylation reactions in some cases, multiple species were obtained, and these are

proposed to be due to  $\text{Ph}_2\text{SiH}_2$  redistribution in solution resulting in various silyl protected alcohol products. In these cases, the reactions were quenched with tetrabutylammonium fluoride (TBAF) and the crude organic product was analysed by  $^1\text{H}$  with internal standard to determine the yield of a single alcohol product.

### Hydrosilylation reactions work up:

Typical quench reaction for hydrosilylation, substrates for **3** and **4**: **2b**, **3b**, **4b**, **10b**, **12b** and **6b** for **4**:

On a 1mM scale reaction in  $\text{C}_6\text{D}_6$  the hydrosilylation reactions were performed in a amber scintillation vial. Each reaction was allowed to stir for the given time in Table **S4** and **S5** in order for conversion to be complete. The reaction mixture was then cooled to  $0^\circ\text{C}$  via an ice bath and 1.1 equivalents of TBAF (1.1mL; 1M solution in THF) was added drop wise and allowed to stir warming to room temperature. Next  $\text{H}_2\text{O}$  (10 mL) was added and the product extracted with DCM (3 x 10mL). The combined organics were washed with brine (15mL), dried with  $\text{MgSO}_4$  and solvent removed *in vacuo*. The crude residue was analysed by  $^1\text{H}$  NMR in  $\text{CDCl}_3$  with 10 mol% internal standard hexamethylcyclotrisiloxane (0.022g, 0.1mM); 10%).

### Synthesis of NHC-Ag(I)HMDS pre-catalysts

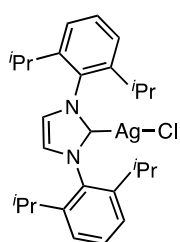

#### Synthesis and characterisation of $\text{Ag}(\text{IDipp})\text{Cl}$ **1**:

To a 3 neck 250 mL RBF was added 1,3-bis(2,6-diisopropylphenyl)imidazolium chloride (6.4 g, 15 mmol) and  $\text{Ag}_2\text{O}$  (2.8 g, 12 mmol) in 80 mL of dichloromethane (DCM) and heated to  $52^\circ\text{C}$  in an oil bath and stirred vigorously for 2.5hrs. The suspension was then allowed to cool and filtered at room temperature. The light-yellow filtrate was concentrated *in vacuo* and recrystallised from DCM and then dried to form a colourless crystalline solid 5.5 g (Yield: 70%).<sup>4</sup>

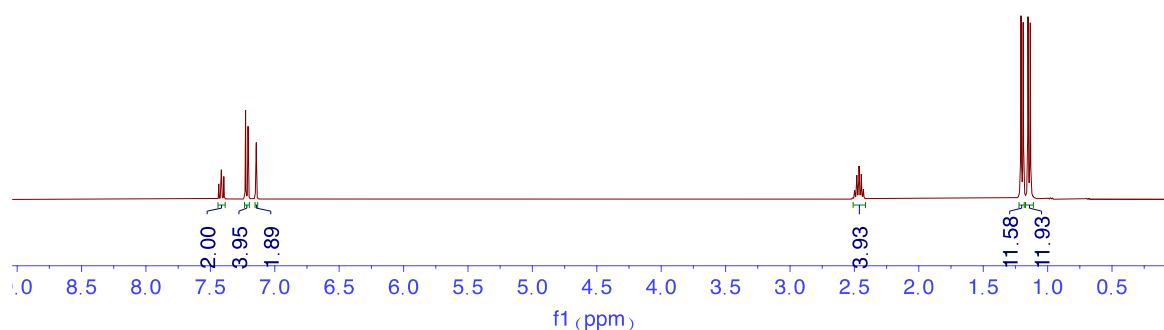

**Figure S1:**  $^1\text{H}$  NMR (400 MHz,  $\text{CDCl}_3$ ) 7.49 (m, 2H), 7.31 (m, 4H), 7.22 (s, 2H), 2.54 (septet,  $J=1.29$  Hz, 4H), 1.29 (d,  $J=1.23$  Hz, 12H), 1.23 (d,  $J=2.5$  Hz, 12H) ppm

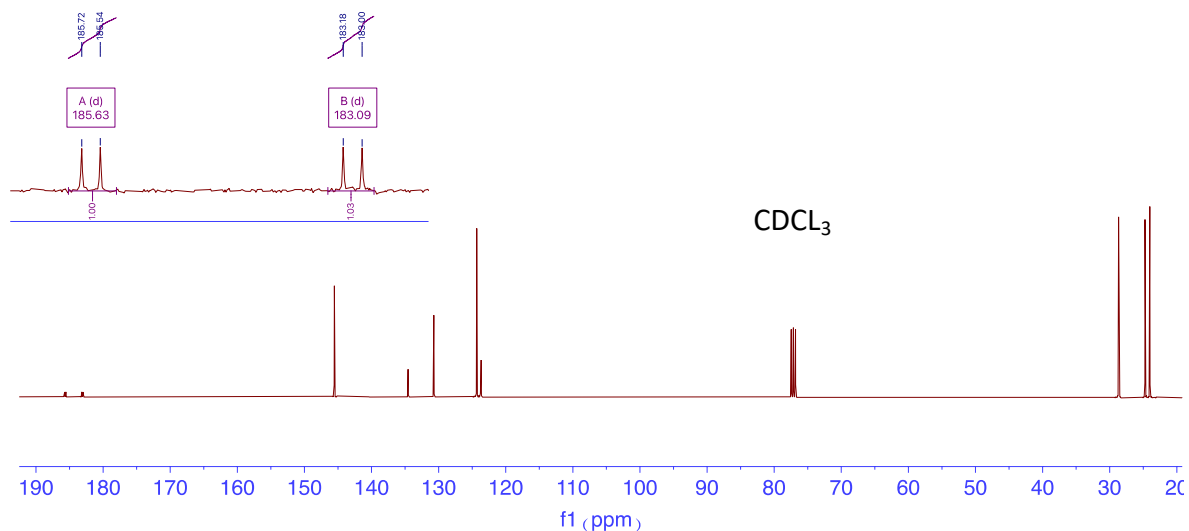

**Figure S2:**  $^{13}\text{C}$  NMR (101 MHz,  $\text{C}_6\text{D}_6$ ) 185.6 (d,  $\text{C}^2\text{-Ag}$ ), 145.4, 134.4, 130.7, 28.3, 24.6, 23.7 185.7-183.0(d,  $^1\text{J } ^{107/109}\text{Ag-}^{13}\text{C}$ ), 185.5-183.1 (d,  $^1\text{J } ^{107/109}\text{Ag-}^{13}\text{C}$ ) ppm.

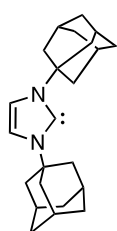

*Synthesis and characterisation of 1,3-bis(1-adamantyl)imidazol-2-ylidene 2:*

Following a modified literature procedure to an oven dried 100 mL J Young's Schlenk Flask was added 1,3-bis(1-adamantyl)imidazolium tetrafluoroborate (10.4 g, 24.5 mmol) and  $\text{KOtBu}$  (2.87 g, 25.6 mmol) and suspended in 90 mL of dry-tetrahydrofuran (THF). The reaction was left to stir at room temperature for 6 hours. The solution was dried in vacuo and resuspended in 50 mL of  $\text{Et}_2\text{O}$  and filtered. The filtrate was then concentrated in vacuo and recrystallised from hexane to form a colourless solid 4.92 g (60%).<sup>5</sup>

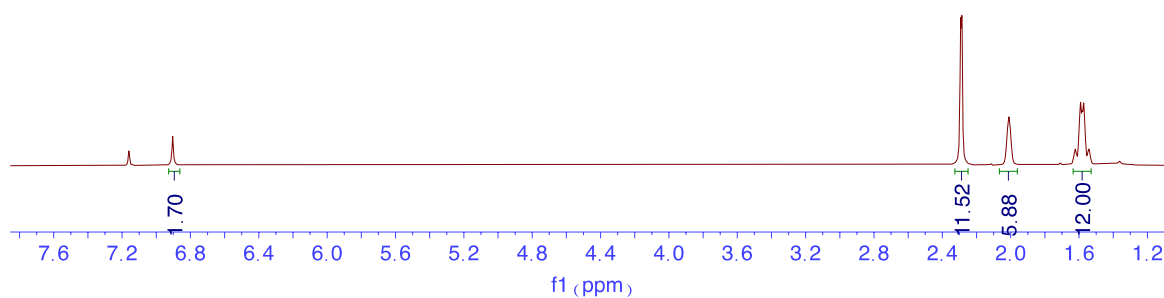

**Figure S3:**  $^1\text{H}$  NMR (400 MHz,  $\text{C}_6\text{D}_6$ ) 1.57 (m, 12H), 2.00 (s, 6H), 2.29 (s, 12H), 6.90 (s, 2H) ppm

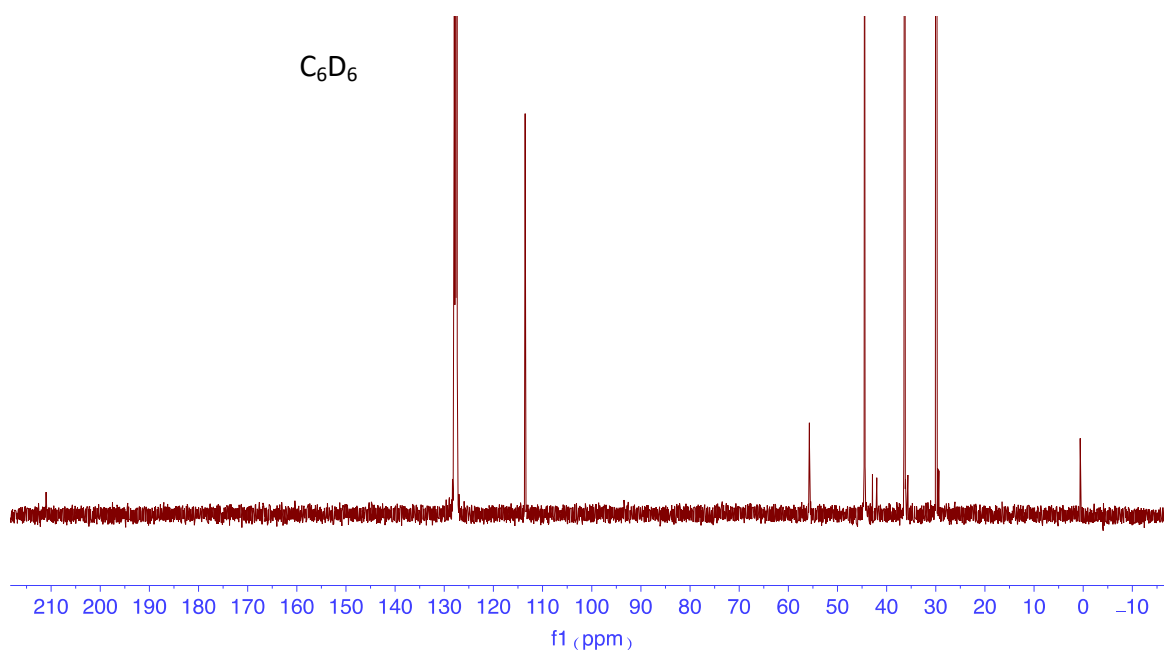

**Figure S4:**  $^{13}\text{C}$  NMR (101 MHz,  $\text{C}_6\text{D}_6$ ) 211.5 (s,  $\text{C}_2$ ), 113.9 (dd), 55.8, 44.5, 36.6, 30.4 ppm

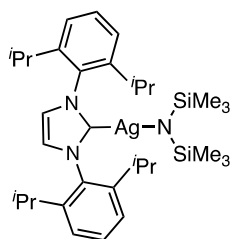

### Synthesis and characterisation of $[\text{Ag}(\text{IDipp})\text{HMDS}]$ , **3**

$\text{Ag}(\text{IDipp})\text{Cl}$  **1** (2.07 g, 4 mmol) was suspended in dry-THF (20 mL). The suspension was cooled to  $-78^\circ\text{C}$  (dry ice/acetone bath) and LiHMDS 1M in THF (4.0 mL, 4 mmol) was added dropwise. The resulting clear yellow solution was left to stir overnight warming to room temperature. The reaction was dried *in vacuo* and resuspended in 20 mL of dry pentane. The resulting suspension was left to stir overnight and filtered. The filtrate was dried *in vacuo* to afford a colourless crystalline solid (0.718g, 40%). X-ray quality crystals were grown from a concentrated n-hexane solution stored at  $-30^\circ\text{C}$ . Elemental analysis calculated for  $\text{C}_{33}\text{H}_{55}\text{AgN}_3\text{Si}_2$ : C, 60.25; H, 8.43; N, 6.39; found: C, 59.44; H, 8.31; N, 6.21.

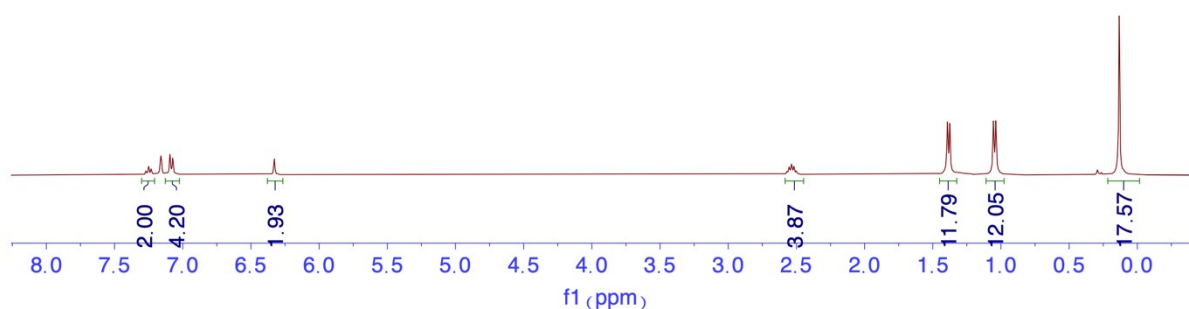

**Figure S5:**  $^1\text{H}$  NMR (400 MHz,  $\text{C}_6\text{D}_6$ ) 0.13 (s, 18H), 1.04 (d, 12H), 1.39 (d, 12H), 2.53 (septet, 4H), 6.31 (s, 2H), 7.08 (m, 4H), 7.25 (m, 2H) ppm



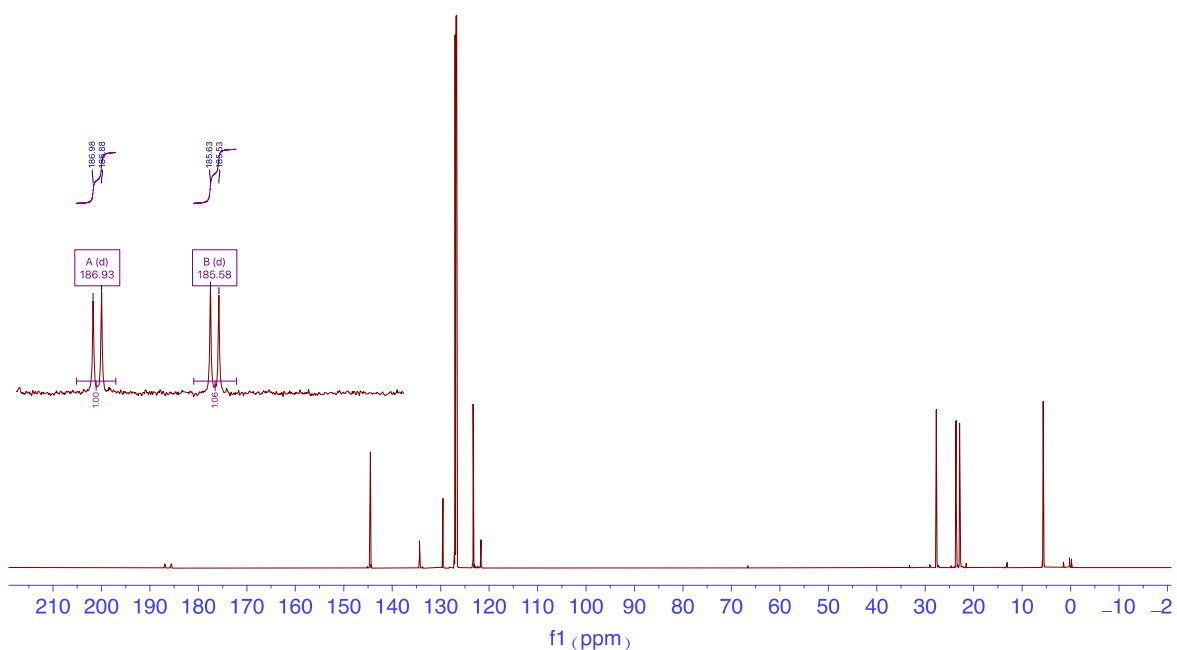

**Figure S6:**  $^{13}\text{C}$  NMR (101 MHz,  $\text{C}_6\text{D}_6$ , 298 K):  $\delta/\text{ppm}$  = 6.8, 24.0, 24.8, 28.9, 122.8, 124.5, 130.7, 135.5, 145.6, 188.1-186.7(d,  $^1\text{J}^{107/109}\text{Ag}-^{13}\text{C}$ ), 188.0-186.8 (d,  $^1\text{J}^{107/109}\text{Ag}-^{13}\text{C}$ ) ppm.

Co-crystallisation of  $[\text{Ag}(\text{IDipp})\text{HMDS}]$  **3** and  $[(\text{AgHMDS})_4]$  in a 3:1 ratio respectively

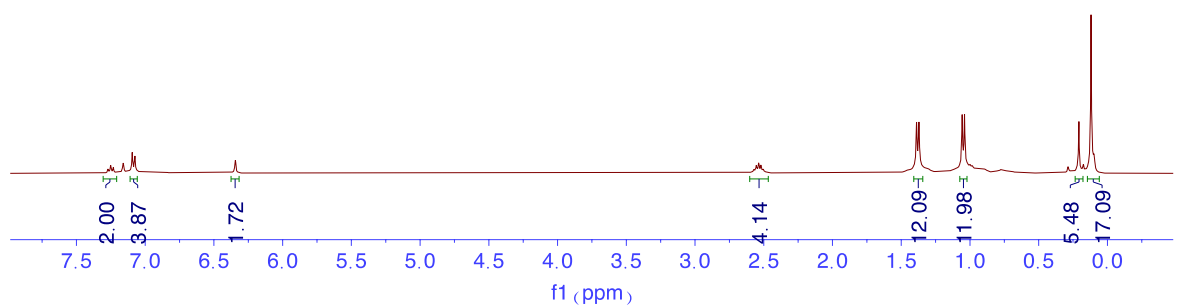

**Figure S7:**  $^1\text{H}$  NMR (400 MHz,  $\text{C}_6\text{D}_6$ )  $[\text{Ag}(\text{IDipp})\text{HMDS}]$  **3**: 0.13 (s, 18H), 1.04 (d, 12H), 1.38 (d, 12H), 2.53 (septet, 4H), 6.34 (s, 2H), 7.08 (m, 4H), 7.24 (m, 2H) ppm.  $[(\text{AgHMDS})_4]$ : 0.20 (s, 6H) ppm.

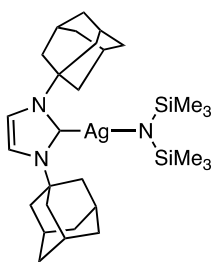

### Synthesis and characterisation of [Ag(IAd)HMDS], **4**

1,3-Bis(1-adamantyl)imidazol-2-ylidene **2** (1.01 g, 3 mmol) and AgCl (0.43 g, 3 mmol) were suspended in 15 mL of dry-THF. The creamy grey suspension was left to stir overnight, cooled to 0°C (ice/salt bath) to form **3** *in situ*. Next LiHMDS (1M in THF, 3.1 mL, 3.1 mmol) was added dropwise and left to stir overnight warming to room temperature. The reaction was dried in *vacuo* and the resulting cream solid resuspended in 20 mL of dry toluene. After stirring overnight, the reaction was filtered and the filtrate dried in *vacuo* to afford an off colourless crystalline solid (1.70g, 94%). X-ray quality crystals were grown from a concentrated toluene solution stored at -30°C. Elemental analysis calculated for C<sub>29</sub>H<sub>51</sub>AgN<sub>3</sub>Si<sub>2</sub>: C, 57.50; H, 8.49; N, 6.94; found: C, 57.50; H, 8.49; N, 6.94; C, 57.65; H, 8.83; N, 7.02.

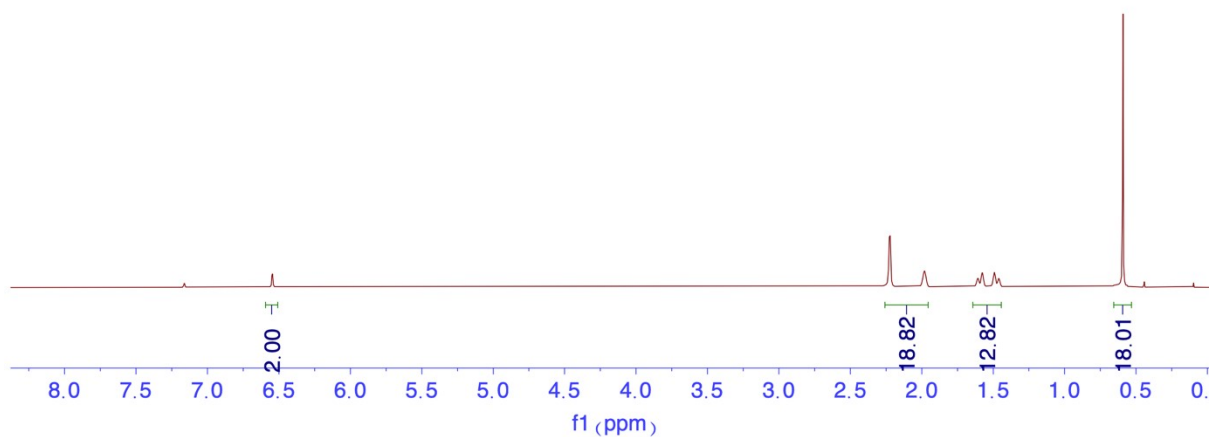

**Figure S8:** <sup>1</sup>H NMR (400 MHz, C<sub>6</sub>D<sub>6</sub>) 0.60 (s, 18H), 1.47-1.59 (m, 12H), 1.90-2.22 (m, 12H), 6.54 (m, 2H) ppm

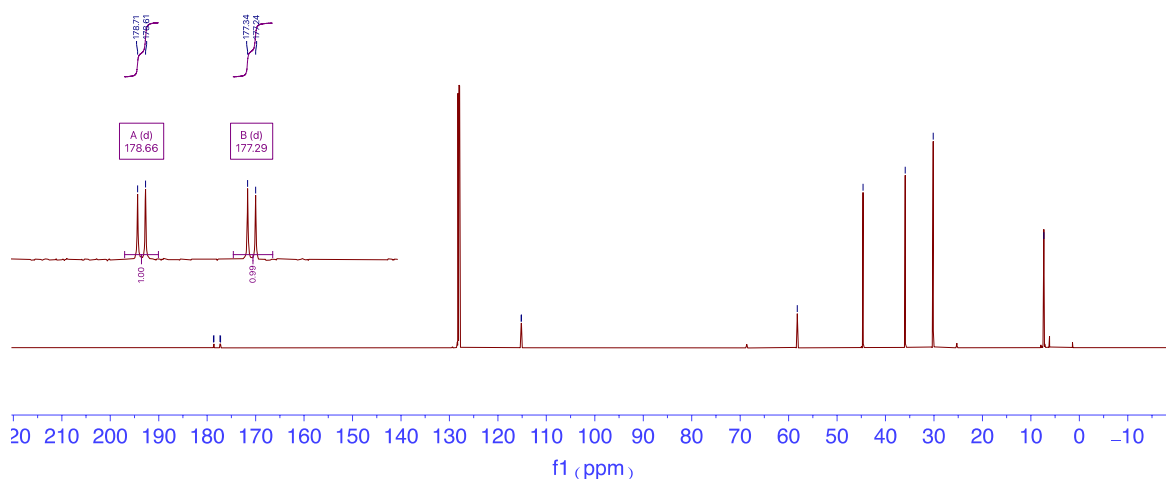

**Figure S9:** <sup>13</sup>C NMR (101 MHz, C<sub>6</sub>D<sub>6</sub>, 298 K): δ/ppm= 6.9, 29.7, 35.5, 44.2, 57.8, 114.7, 177.5-176.0 (d, <sup>1</sup>J<sup>107/109</sup>Ag-<sup>13</sup>C), 177.4-176.1 (d, <sup>1</sup>J<sup>107/109</sup>Ag-<sup>13</sup>C) ppm.

# Light experiments

In a typical procedure a 20 mol% 1M solution of pre-catalyst **3-5** was prepared and added to a clear J. Youngs NMR tube and dissolved in 0.5 mL of  $C_6D_6$  containing 10 mol% internal reference standard hexamethylcyclotrisiloxane and monitored by  $^1H$  NMR and  $^{12}C$  NMR under standard laboratory conditions

[Ag(IDipp)HMDS] **3**:

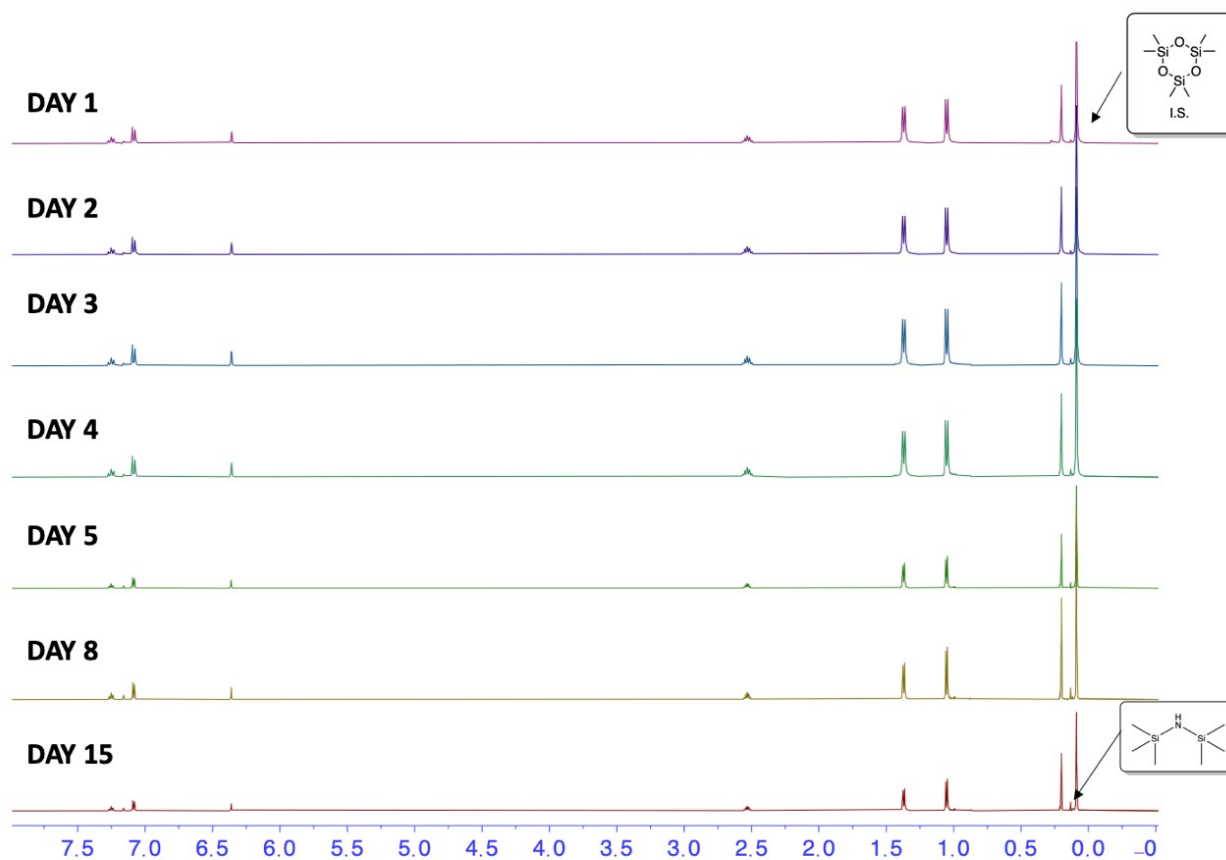

Figure S10.  $^1H$  NMR overlay at 300K of 20 mol% [Ag(IDipp)HMDS] **3** in  $C_6D_6$

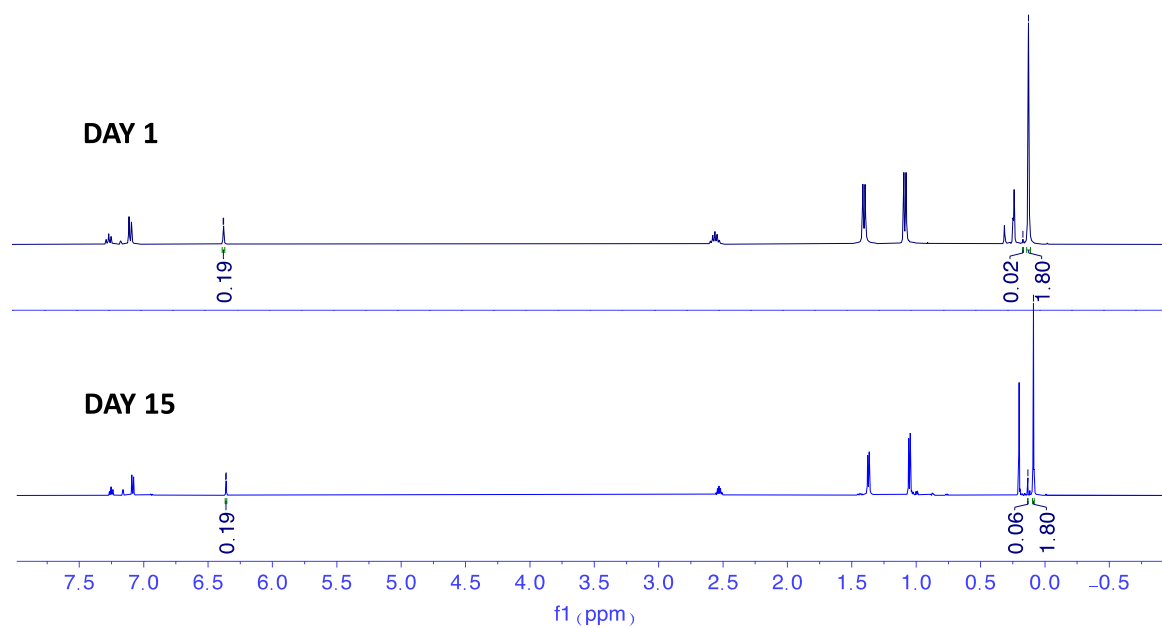

**Figure S11.** <sup>1</sup>H NMR overlay at 300K of 20 mol% [Ag(IDipp)HMDS] **3** in C<sub>6</sub>D<sub>6</sub> on day 1 versus day 15 with integrations

**[Ag(IAd)HMDS] 4:**

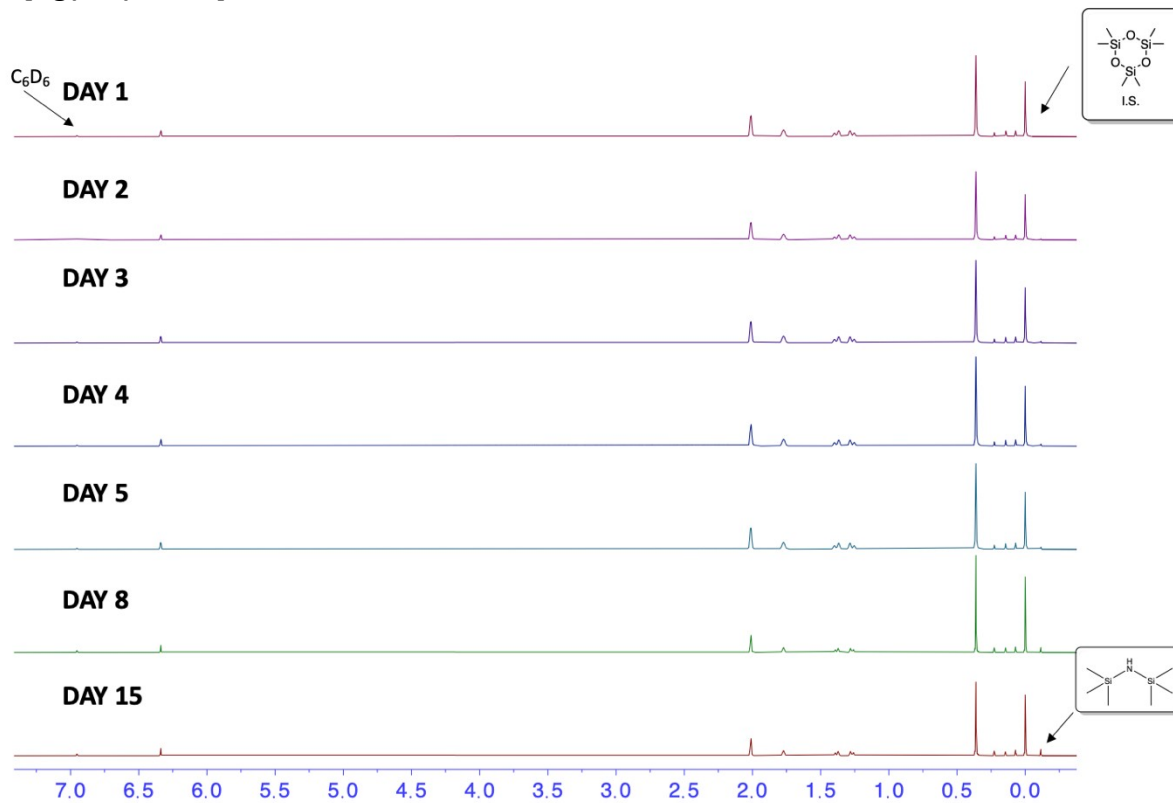

**Figure S12.** <sup>1</sup>H NMR overlay at 300K of 20 mol% [Ag(IAd)HMDS] 4 in C<sub>6</sub>D<sub>6</sub>

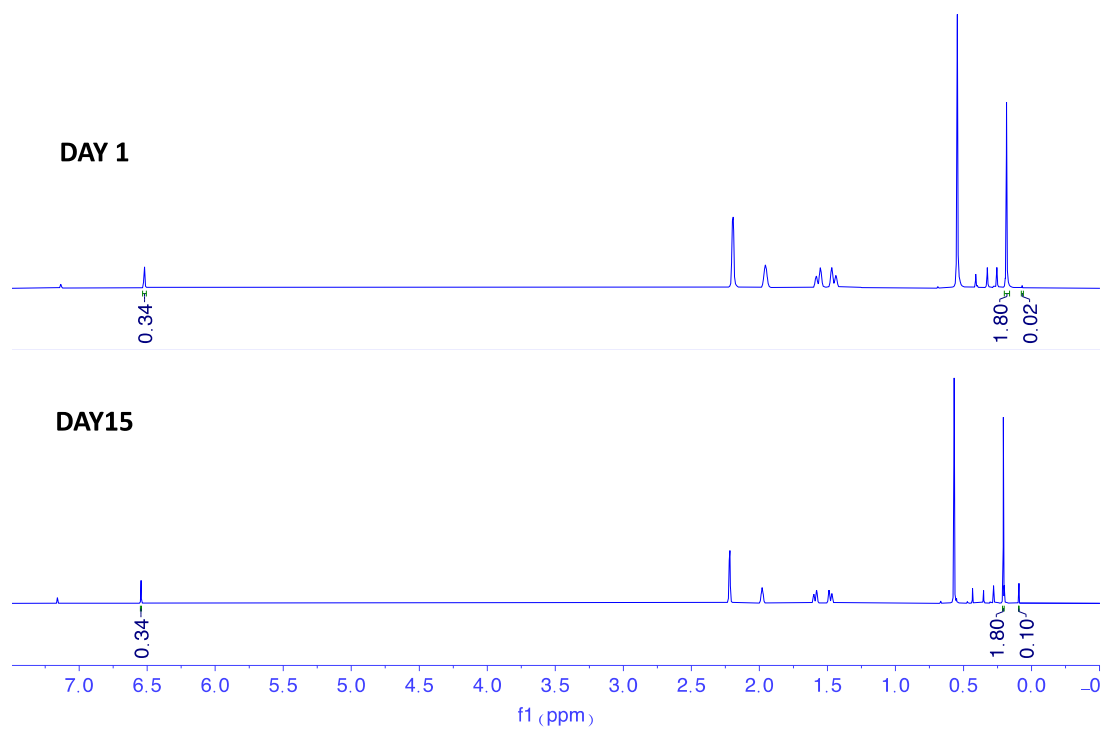

**Figure S13.** <sup>1</sup>H NMR overlay at 300K of 20 mol% [Ag(IAd)HMDS] 4 in C<sub>6</sub>D<sub>6</sub> on day 1 versus day 15 with integrations

**[Ag(PCy<sub>3</sub>)HMDS] 5:**

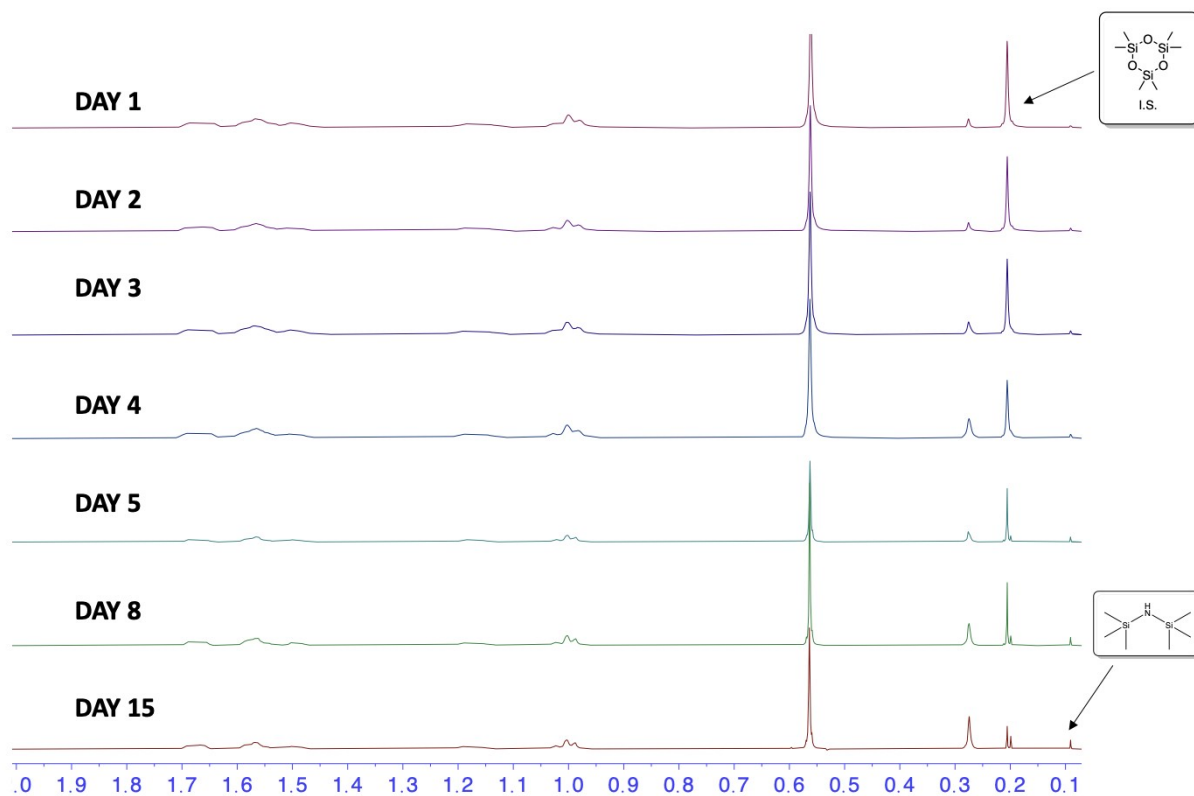

**Figure S14.** <sup>1</sup>H NMR overlay at 300K of 20 mol% [Ag(PCy<sub>3</sub>)HMDS] 5 in C<sub>6</sub>D<sub>6</sub>

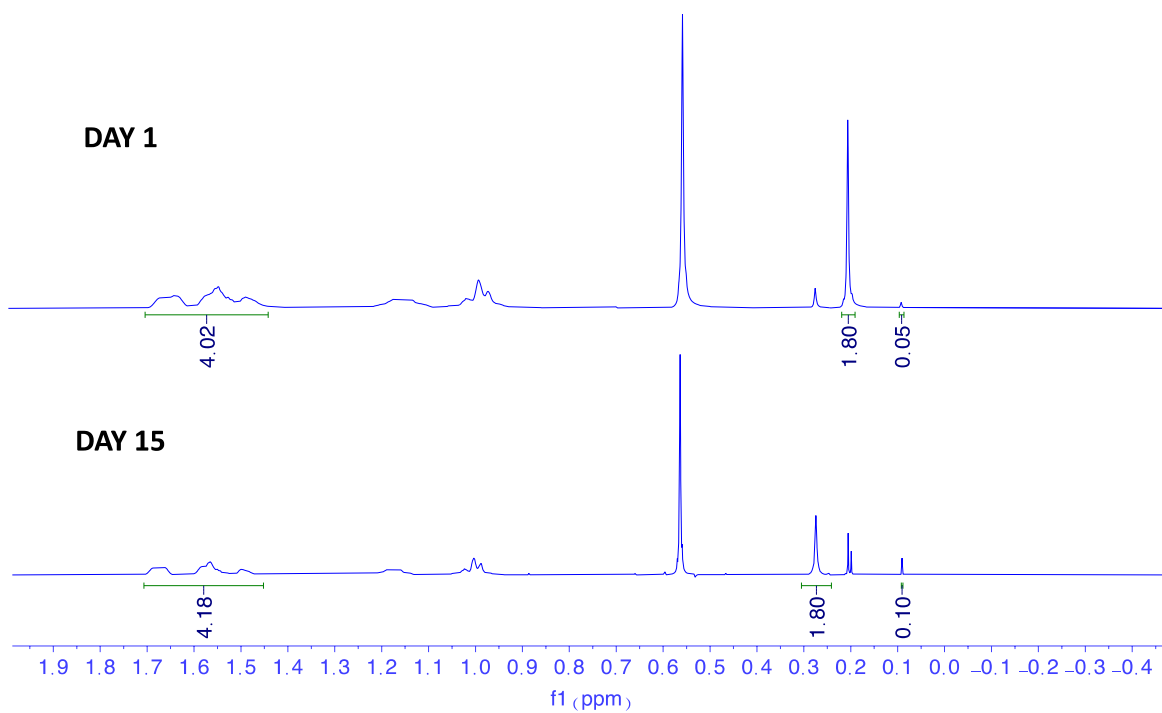

**Figure S15.** <sup>1</sup>H NMR overlay at 300K of 20 mol% [Ag(PCy<sub>3</sub>)HMDS] 5 in C<sub>6</sub>D<sub>6</sub> on day 1 versus day 15 with integrations

# X-ray crystallography data

**Table S1** Crystallographic data and refinement details for compounds **4** and **5**.

| Identification                    | [(Dipp)AgHMDS] <b>3</b>                                          | [(IAd)AgHMDS] <b>4</b>                                           |
|-----------------------------------|------------------------------------------------------------------|------------------------------------------------------------------|
| Empirical formula                 | C <sub>33</sub> H <sub>54</sub> AgN <sub>3</sub> Si <sub>2</sub> | C <sub>29</sub> H <sub>50</sub> AgN <sub>3</sub> Si <sub>2</sub> |
| Formula weight                    | 656.84                                                           | 604.77                                                           |
| Temperature                       | 123.0(3)                                                         | 123.0(3)                                                         |
| Wavelength                        | 0.71073                                                          | 0.71073                                                          |
| Crystal system                    | monoclinic                                                       | monoclinic                                                       |
| Space group                       | P2 <sub>1</sub> /n                                               | C2/c                                                             |
| a (Å)                             | 12.9154(4)                                                       | 20.2489(8)                                                       |
| b (Å)                             | 13.4372(4)                                                       | 12.2700(5)                                                       |
| c (Å)                             | 21.5913(7)                                                       | 12.8905(6)                                                       |
| α (°)                             | 90                                                               | 90                                                               |
| β (°)                             | 104.206(3)                                                       | 105.751(4)                                                       |
| γ (°)                             | 90                                                               | 90                                                               |
| Cell volume (Å <sup>3</sup> )     | 3632.5(2)                                                        | 3082.4(2)                                                        |
| Z, calculated density             | 16                                                               | 4                                                                |
| Absorption coefficient            | 1.048 mm <sup>-1</sup>                                           | 0.753 mm <sup>-1</sup>                                           |
| F(000)                            | 1517.0                                                           | 1280.0                                                           |
| Crystal size                      | 0.021 x 0.104 x 0.271 mm                                         | 0.526 x 0.164 x 0.109 mm                                         |
| Theta range for data collection   | 6.676 to 61.41°                                                  | 6.642 to 56.55°                                                  |
| Limiting indices                  | -15 ≤ h ≤ 17,<br>-14 ≤ k ≤ 18,<br>-26 ≤ l ≤ 26                   | -26 ≤ h ≤ 26,<br>-15 ≤ k ≤ 16,<br>-16 ≤ l ≤ 17                   |
| Reflections collected / unique    | 38963/ 9021 [R <sub>int</sub> = 0.0535]                          | 19847/3815 [R <sub>int</sub> = 0.0678]                           |
| Completeness to theta = 25.244    | 99.69%                                                           | 99.73%                                                           |
| Absorption correction             | spherical harmonics                                              | spherical harmonics                                              |
| Max. and min. transmission        | 1.00000 and 0.53434                                              | 1.000 and 0.438                                                  |
| Refinement method                 | Full-matrix least-squares on F <sup>2</sup>                      | Full-matrix least-squares on F <sup>2</sup>                      |
| Data / restraints / parameters    | 9021/0/157                                                       | 3815/0/163                                                       |
| Goodness-of-fit on F <sup>2</sup> | 1.637                                                            | 1.068                                                            |
| Final R indices [I > 2σ(I)]       | R <sub>1</sub> = 0.0811, wR <sub>2</sub> = 0.2417                | R <sub>1</sub> = 0.0396, wR <sub>2</sub> = 0.1087                |
| R indices (all data)              | R <sub>1</sub> = 0.1185 wR <sub>2</sub> = 0.2547                 | R <sub>1</sub> = 0.0425, wR <sub>2</sub> = 0.1107                |
| Extinction coefficient            | n/a                                                              | n/a                                                              |
| Largest diff. peak and hole       | 2.30/-1.42                                                       | 1.43/-1.36                                                       |

# Catalytic hydroboration using **3**

Table S2: Carbonyl hydroboration using HBpin, catalysed by [Ag(IDipp)HMDS]

| Table S2. Hydroboration of carbonyls catalysed by <b>3</b> |         |             |       |         |             |
|------------------------------------------------------------|---------|-------------|-------|---------|-------------|
|                                                            |         |             |       |         |             |
| Entry                                                      | Product | <b>3</b>    | Entry | Product | <b>3</b>    |
| 1a                                                         |         | 0.5h<br>95% | 8a    |         | 24h<br>61%  |
| 2a                                                         |         | 0.5h<br>98% | 9a    |         | 1.5h<br>97% |
| 3a                                                         |         | 0.2h<br>99% | 10a   |         | 0.7h<br>99% |
| 4a                                                         |         | 0.2h<br>98% | 11a   |         | 6.7h<br>90% |
| 5a                                                         |         | 0.2h<br>93% | 12a   |         | 2h<br>75%   |
| 6a                                                         |         | 1.5h<br>98% | 13a   |         | 0.7h<br>90% |
| 7a                                                         |         | 0.5h<br>98% | 14a   |         | 24h<br>60%  |

% values indicate % conversion of starting material [a] Reaction conditions: substrate (1 mmol), HBpin (1.5 mmol), 5 mol% [Ag(Dipp)HMDS] (**3**) with 10 mol% internal standard hexamethylcyclotrisiloxane in C<sub>6</sub>D<sub>6</sub> at room temperature.



# 1a, Benzaldehyde

t= 0.5h  
c= 95%

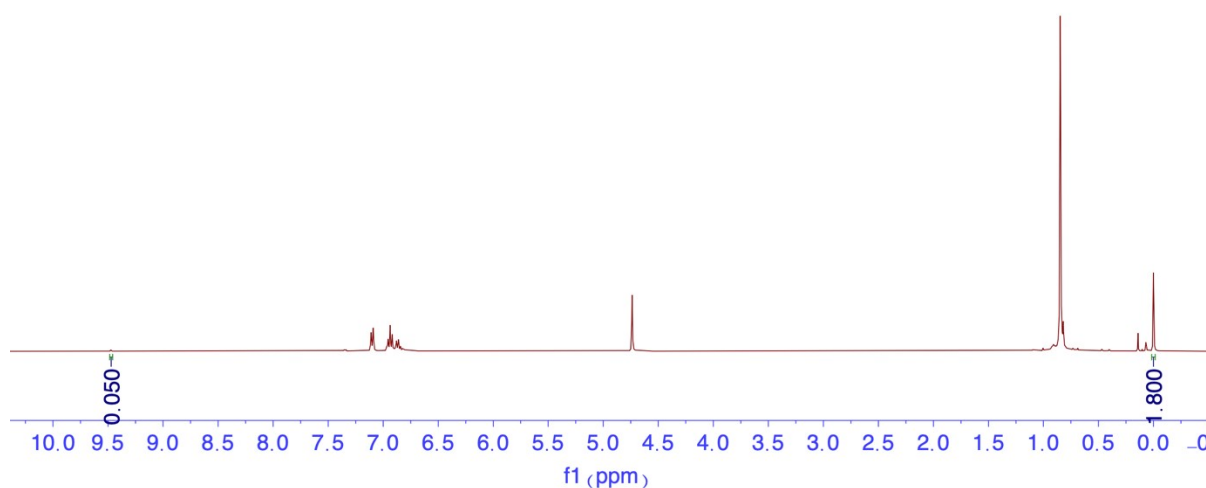

Before addition of **3** and HBpin

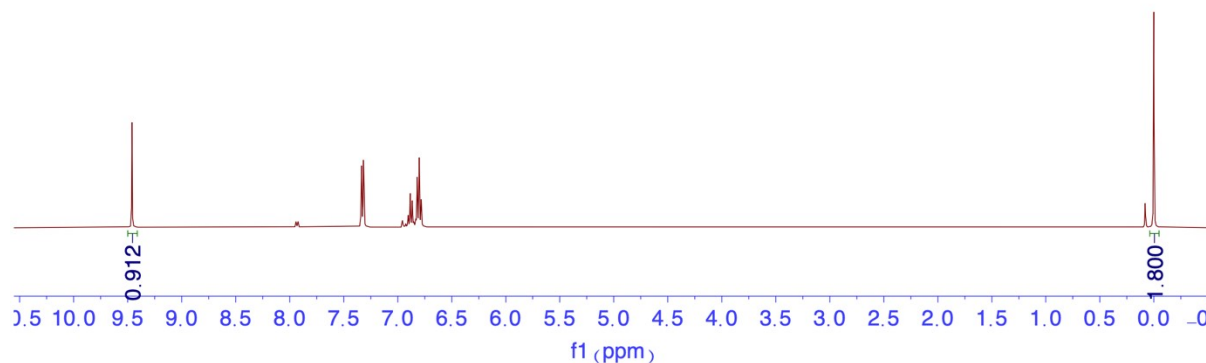

**Figure S16 .** <sup>1</sup>H NMR overlay of catalytic hydroboration of benzaldehyde with HBpin using [Ag(IDipp)HMDS] **3** (5 mol%) in C<sub>6</sub>D<sub>6</sub> at 300K

<sup>1</sup>H NMR (400.1 MHz, C<sub>6</sub>D<sub>6</sub>, 300K) δ 7.30 (2H, d), 7.14 (2H, t), 7.06 (1H, m), 4.92 (2H, s) and 1.05 (12H, s) ppm.

<sup>11</sup>B (128.38 MHz, C<sub>6</sub>D<sub>6</sub>, 300K) δ 22.5 ppm (O-Bpin) ppm.

<sup>13</sup>C NMR (100.62 MHz, C<sub>6</sub>D<sub>6</sub>, 300K) δ 139.2 (quat-C), 128.5, (Ar-C), 127.5 (Ar-C), 127.0 (Ar-C), 82.8 (C of Bpin), 66.8 (C-H) and 24.6 (CH<sub>3</sub> of Bpin) ppm.

## 2a, 4-Br-Benzaldehyde

t= 0.5h  
c=98%

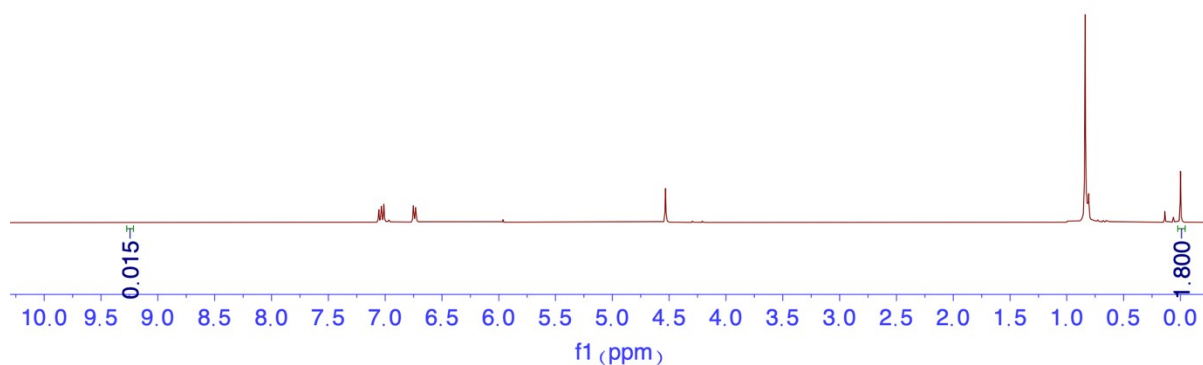

Before addition of **3** and HBpin

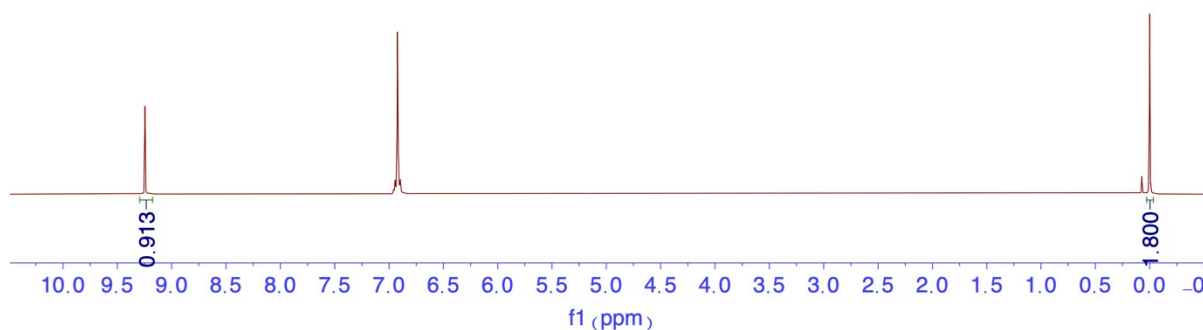

**Figure S17.** <sup>1</sup>H NMR overlay of catalytic hydroboration of 4-Br-Benzaldehyde with HBpin using **[Ag(IDipp)HMDS] 3** (5 mol%) in C<sub>6</sub>D<sub>6</sub> at 300K

<sup>1</sup>H NMR (400.1 MHz, C<sub>6</sub>D<sub>6</sub>, 300K) δ 7.02 (2H, t), 8.74 (2H, d), 7.06 (1H, m), 4.52 (2H, s) and 0.83 (12H, s, CH<sub>3</sub> of Bpin) ppm.

<sup>11</sup>B (128.38 MHz, C<sub>6</sub>D<sub>6</sub>, 300K) δ 22.5 (O-Bpin) ppm.

<sup>13</sup>C NMR (100.62 MHz, C<sub>6</sub>D<sub>6</sub>, 300K) δ 139.1 (quat-C), 131.8 (Ar-C), 121.4 (Ar-C), 82.8 (C of Bpin), 66.0 (O-CH<sub>2</sub>), 24.6 (CH<sub>3</sub> of Bpin) ppm.

## 3a, 4-CN-Benzaldehyde

t= 0.2h

c= 99%

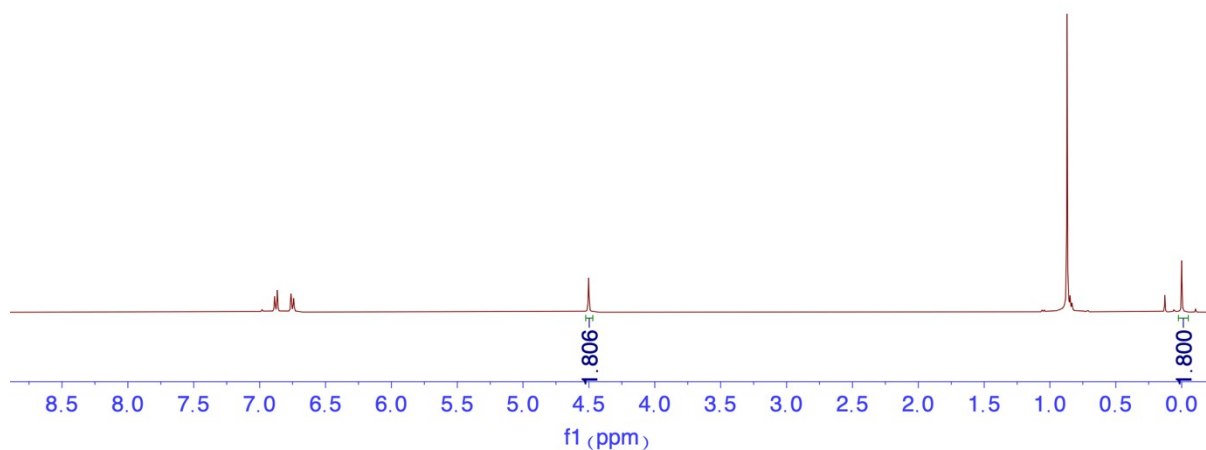

Before addition of **3** and HBpin

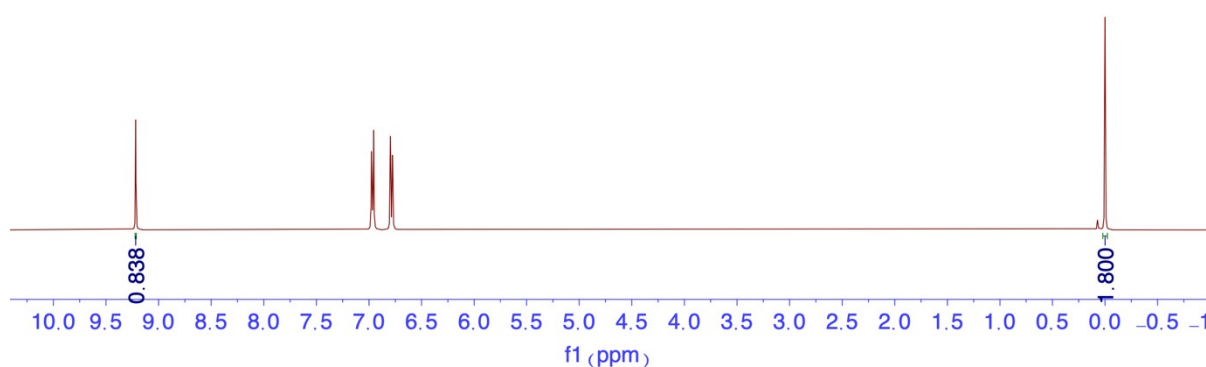

**Figure S18.**  $^1\text{H}$  NMR overlay of catalytic hydroboration of 4-CN-Benzaldehyde with HBpin using **[Ag(IDipp)HMDS] 3** (5 mol%) in  $\text{C}_6\text{D}_6$  at 300K

$^1\text{H}$  NMR (400.1 MHz,  $\text{C}_6\text{D}_6$ , 300K)  $\delta$  7.05 (2H, d), 6.93 (2H, d), 4.68 (2H, s), 1.04 (12H, s,  $\text{CH}_3$ -of Bpin) ppm.

$^{11}\text{B}$  (128.38 MHz,  $\text{C}_6\text{D}_6$ , 300K)  $\delta$  22.5 (O-Bpin) ppm.

$^{13}\text{C}$  NMR (100.62 MHz,  $\text{C}_6\text{D}_6$ , 300K)  $\delta$  144.6, 132.1, 126.8, 118.8, 111.6, 83.2, 66.2, 24.7 ( $\text{CH}_3$ -of Bpin) ppm.

# 4a, 2-CF<sub>3</sub>-Benzaldehyde

t=0.2h

c=98%

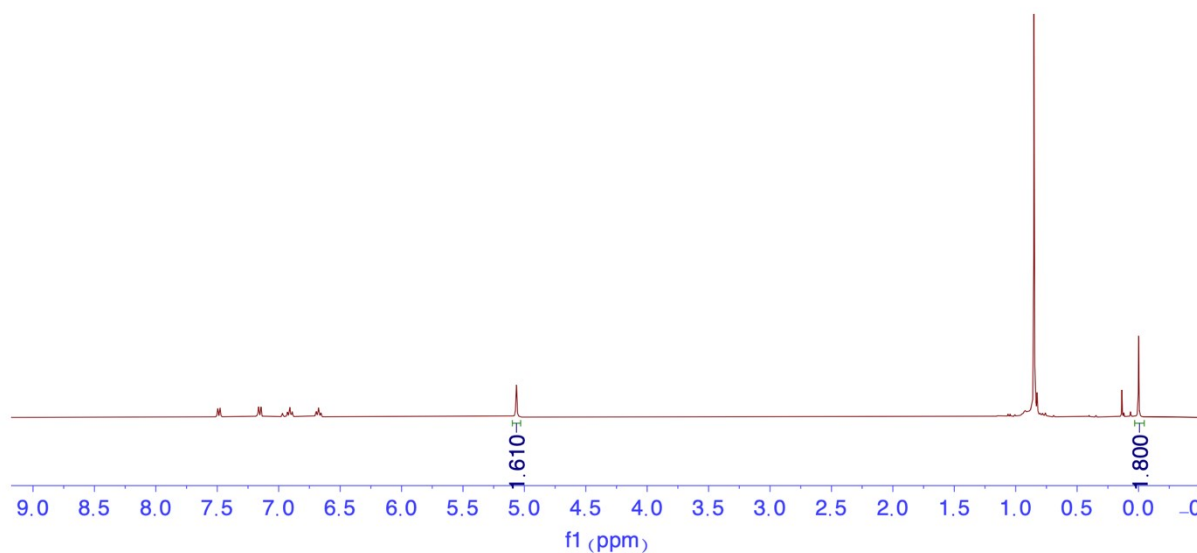

Before addition of **3** and HBpin

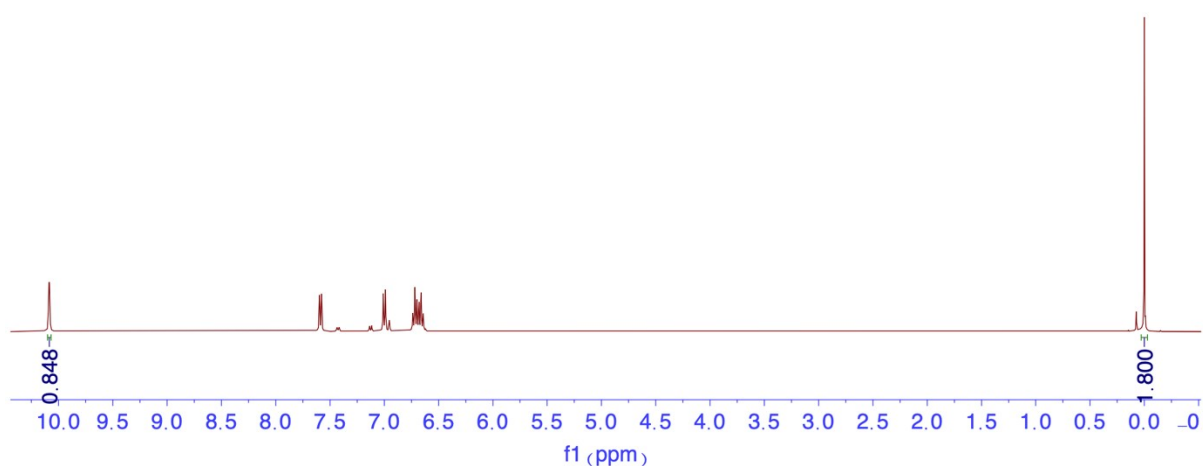

**Figure S19.** <sup>1</sup>H NMR overlay of catalytic hydroboration of 2-CF<sub>3</sub>-Benzaldehyde with HBpin using [Ag(IDipp)HMDS] **3** (5 mol%) in C<sub>6</sub>D<sub>6</sub> at 300K

<sup>1</sup>H NMR (400.1 MHz, C<sub>6</sub>D<sub>6</sub>, 300K) δ 7.48 (1H, d), 7.16 (1H, d), 6.90 (1H, t), 6.67 (1H, t), 5.06 (2H, s), 0.85 (12H, s) ppm.

<sup>11</sup>B (128.38 MHz, C<sub>6</sub>D<sub>6</sub>, 300K) δ 22.7 (O-Bpin) ppm.

<sup>13</sup>C NMR (100.62 MHz, C<sub>6</sub>D<sub>6</sub>, 300K) δ 138.4, 131.9, 127.1, 126.6, 126.4, 125.7, 123.7, 82.8, 62.7, 24.1 ppm.

## 5a, 3-OMe-Benzaldehyde

t= 0.2h

c= 93%

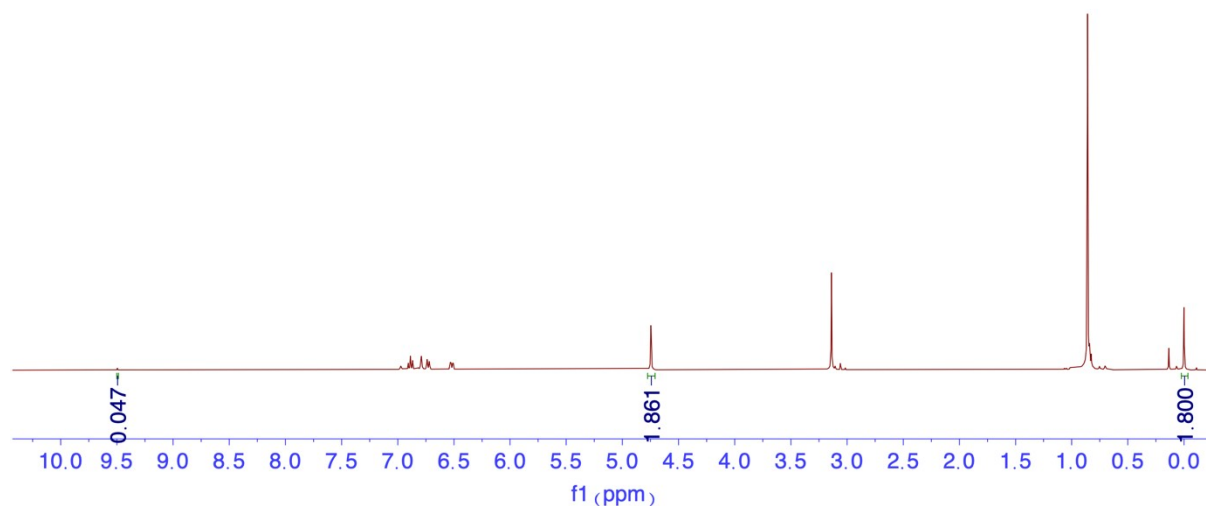

Before addition of **3** and HBpin

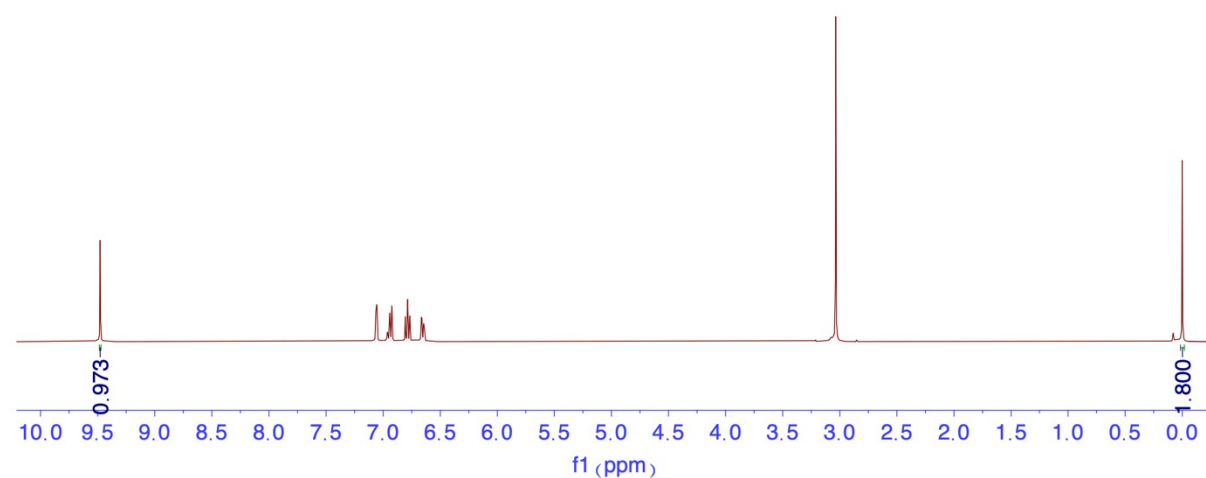

**Figure S20.** <sup>1</sup>H NMR overlay of catalytic hydroboration of 3-OMe-Benzaldehyde with HBpin using [Ag(IDipp)HMDS] **3** (5 mol%) in C<sub>6</sub>D<sub>6</sub> at 300K

<sup>1</sup>H NMR (400.1 MHz, C<sub>6</sub>D<sub>6</sub>, 300K) δ 6.88 (1H, t), 6.79 (1H, m), 6.72 (1H, d), 6.51 (1H, dd), 4.72 (2H, s), 3.13 (3H, s), 0.85 (12H, s) ppm.

<sup>11</sup>B (128.38 MHz, C<sub>6</sub>D<sub>6</sub>, 300K) δ 22.5 (O-Bpin) ppm.

<sup>13</sup>C NMR (100.62 MHz, C<sub>6</sub>D<sub>6</sub>, 300K) δ 160.3, 141.5, 129.5, 119.0, 113.5, 112.0, 82.6, 66.8, 54.6, 24.4 ppm.

## 6a, Mesitaldehyde

t= 1.5h

c= 98%

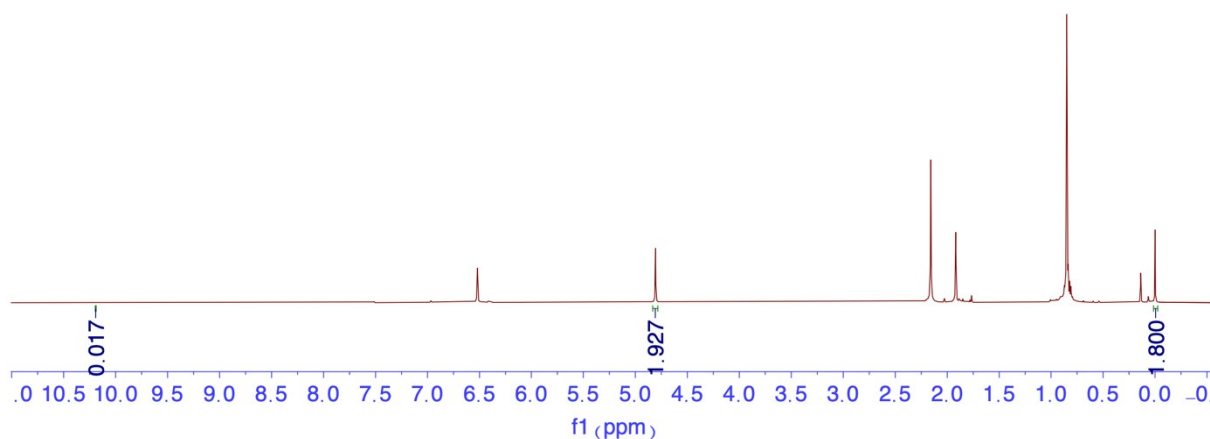

Before addition of **3** and HBpin

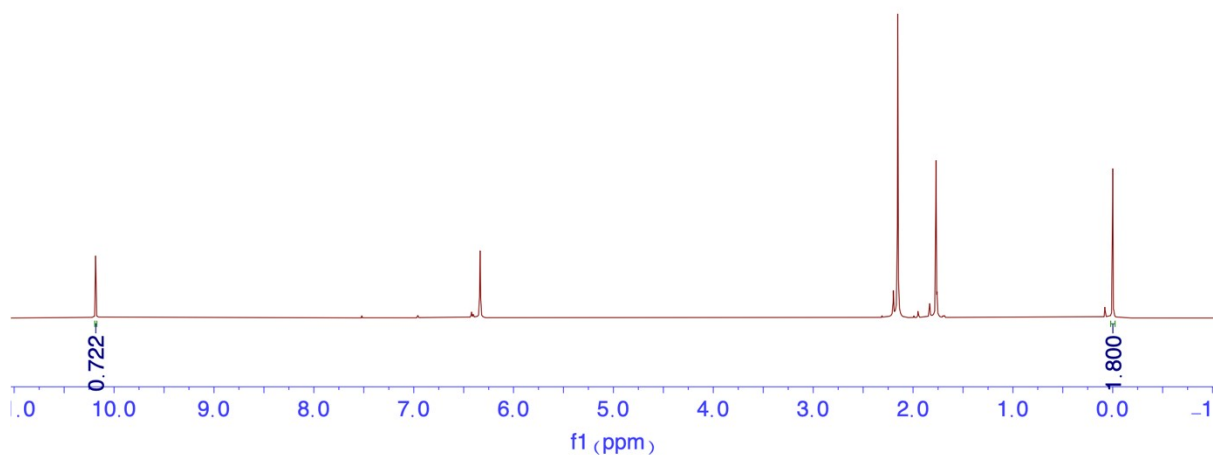

**Figure S21.**  $^1\text{H}$  NMR overlay of catalytic hydroboration of mesitaldehyde with HBpin using [Ag(IDipp)HMDS] **3** (5 mol%) in  $\text{C}_6\text{D}_6$  at 300K

$^1\text{H}$  NMR (400.1 MHz,  $\text{C}_6\text{D}_6$ , 300K)  $\delta$  6.70 (2H, s), 4.99 (2H, s), 2.34 (6H, s), 2.10 (3H, s), 1.03 (12H, s) ppm.

$^{11}\text{B}$  (128.38 MHz,  $\text{C}_6\text{D}_6$ , 300K)  $\delta$  22.7 (O-Bpin), 25.6 (HMDS-Bpin) ppm.

$^{13}\text{C}$  NMR (100.62 MHz,  $\text{C}_6\text{D}_6$ , 300K)  $\delta$  137.7, 132.9, 129.3, 82.3, 61.5, 24.4, 20.8, 19.3 ppm.

# 7a, *t*Butylaldehyde

t= 0.5h  
c=98%

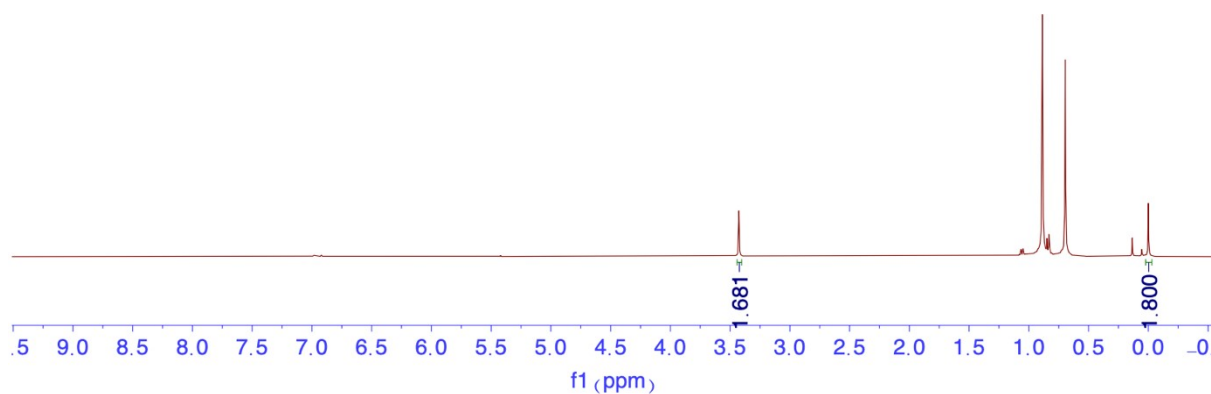

Before addition of **3** and HBpin

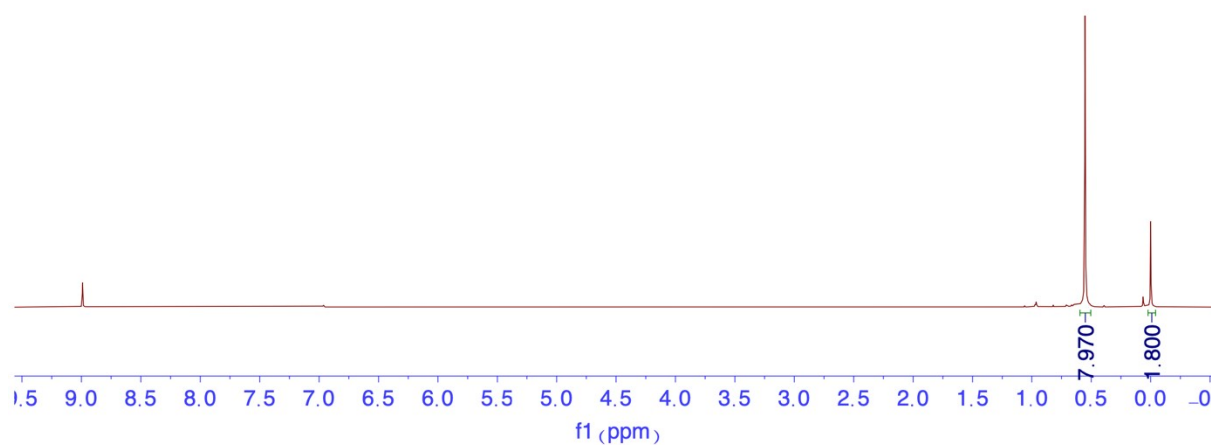

**Figure S22.**  $^1\text{H}$  NMR overlay of catalytic hydroboration of *t*Butylaldehyde with HBpin using [Ag(IDipp)HMDS] **3** (5 mol%) in  $\text{C}_6\text{D}_6$  at 300K

$^1\text{H}$  NMR (400.1 MHz,  $\text{C}_6\text{D}_6$ , 300K)  $\delta$  3.60 (2H, s), 1.07 (12H, s), 0.87 (9H, s) ppm.

$^{11}\text{B}$  (128.38 MHz,  $\text{C}_6\text{D}_6$ , 300K)  $\delta$  22.6 (O-Bpin) ppm

$^{13}\text{C}$  NMR (100.62 MHz,  $\text{C}_6\text{D}_6$ , 300K)  $\delta$  82.3, 75.0, 32.5, 26.2, 24.5 ppm.

## 8a, Acetophenone

t= 24h  
c= 61%

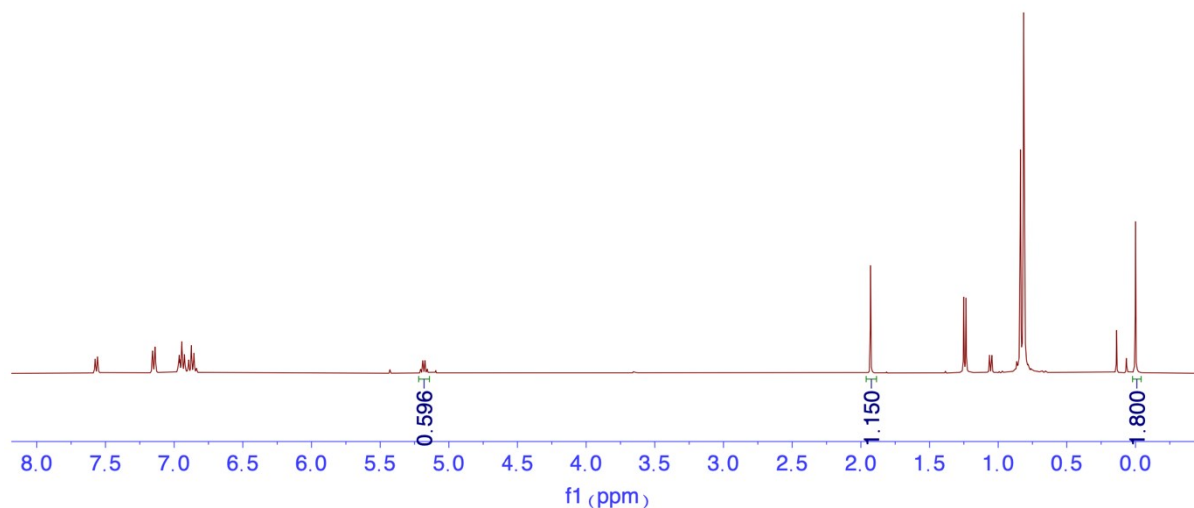

Before addition of **3** and HBpin

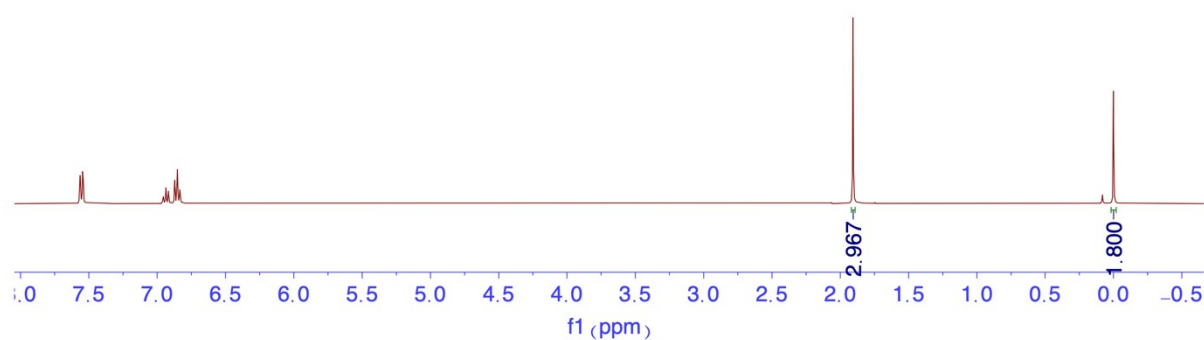

**Figure S23.** <sup>1</sup>H NMR overlay of catalytic hydroboration of acetophenone with HBpin using [Ag(IDipp)HMDS] **3** (5 mol%) in C<sub>6</sub>D<sub>6</sub> at 300K

<sup>1</sup>H NMR (400.1 MHz, C<sub>6</sub>D<sub>6</sub>, 300K) δ 7.56 (1H, d), 7.14 (1H, d), 6.98-6.91 (2H, m), 6.89-6.83 (1H, m), 5.18 (1H, s), 1.24 (3H, s) 0.81 (12H, s) ppm.

<sup>11</sup>B (128.38 MHz, C<sub>6</sub>D<sub>6</sub>, 300K) δ 22.5 (O-Bpin) ppm.

<sup>13</sup>C NMR (100.62 MHz, C<sub>6</sub>D<sub>6</sub>, 300K) δ 145.3, 128.5, 127.3, 125.7, 82.5, 72.8, 24.9 and 24.6 ppm.



# 9a, Benzophenone

t= 1.5h  
c= 97%

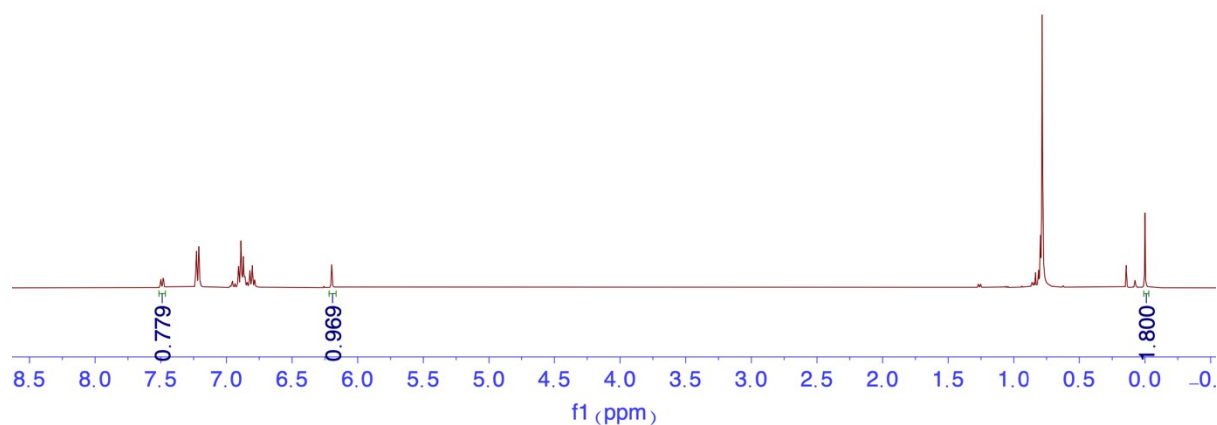

Before addition of **3** and HBpin

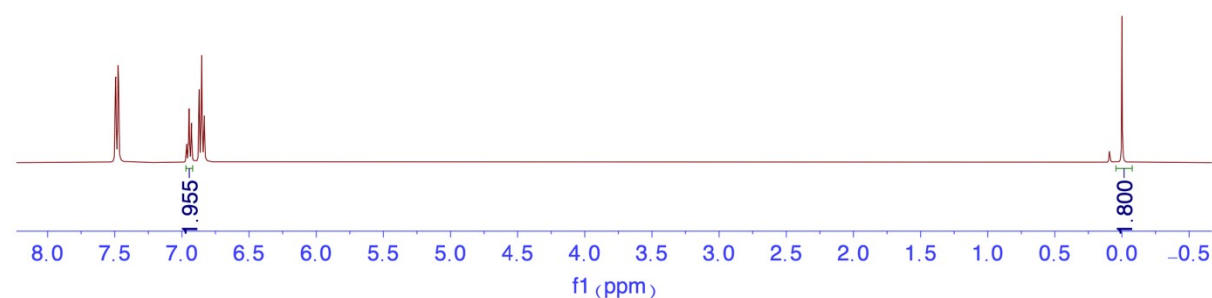

**Figure S24.** <sup>1</sup>H NMR overlay of catalytic hydroboration of benzophenone with HBpin using [Ag(IDipp)HMDS] **3** (5 mol%) in C<sub>6</sub>D<sub>6</sub> at 300K

<sup>1</sup>H NMR (400.1 MHz, C<sub>6</sub>D<sub>6</sub>, 300K) δ 7.42 (4H, d), 7.15 (1H, t), 7.09 (4H, t), 7.01 (2H, tt) and 0.98 (12H, s, CH<sub>3</sub> of Bpin) ppm.

<sup>11</sup>B (128.38 MHz, C<sub>6</sub>D<sub>6</sub>, 300K) δ 22.8 (O-Bpin) ppm.

<sup>13</sup>C NMR (100.62 MHz, C<sub>6</sub>D<sub>6</sub>, 300K) δ 143.8, 128.5, 127.5, 126.9, 82.8, 78.4, 24.3 ppm.

# 10a, 2,2,2-Trifluoroacetophenone

t= 0.7h  
c=99%

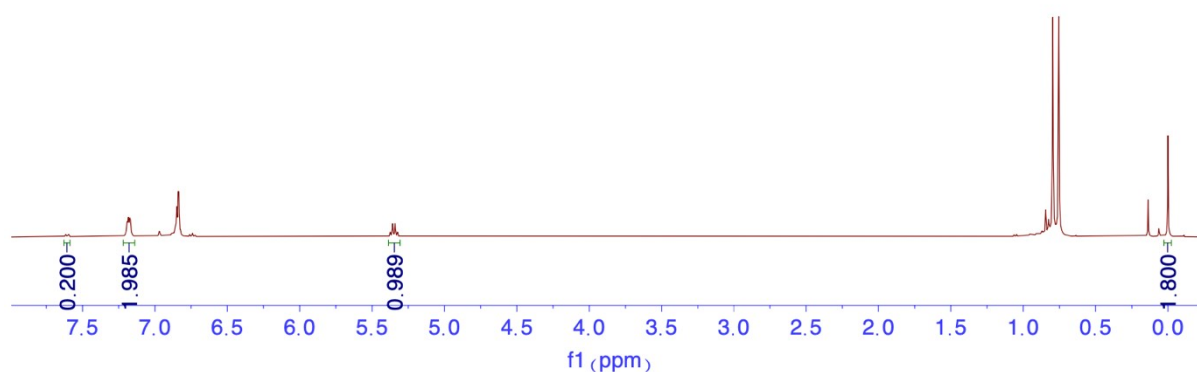

Before addition of **3** and HBpin

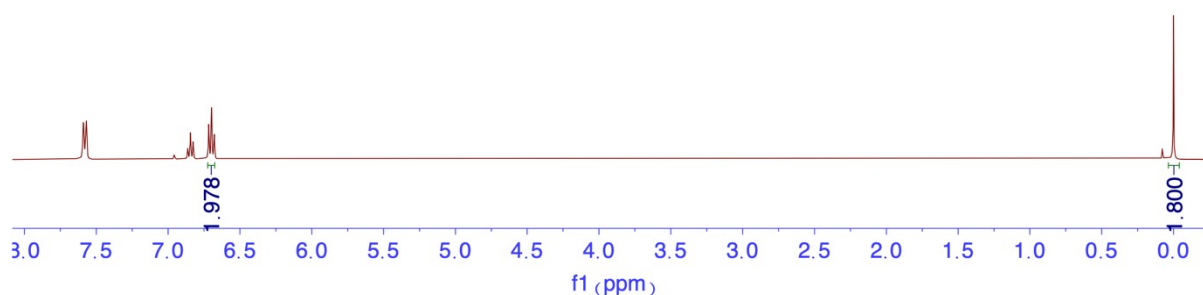

**Figure S25.**  $^1\text{H}$  NMR overlay of catalytic hydroboration of 2,2,2-Trifluoroacetophenone with HBpin using **[Ag(IDipp)HMDS] 3** (5 mol%) in  $\text{C}_6\text{D}_6$  at 300K

$^1\text{H}$  NMR (400.1 MHz,  $\text{C}_6\text{D}_6$ , 300K)  $\delta$  7.37 (2H, m), 7.05-6.98 (3H, m), 5.52 (1H, q), 0.96 (12H, d) ppm.

$^{11}\text{B}$  (128.38 MHz,  $\text{C}_6\text{D}_6$ , 300K)  $\delta$  25.7 (HMDS-Bpin), 22.8 ppm (O-Bpin) ppm.

$^{13}\text{C}$  NMR (100.62 MHz,  $\text{C}_6\text{D}_6$ , 300K)  $\delta$  133.9, 129.5, 128.6, 127.9, 83.7, 74.6, 24.4 ppm.

# 11a, 4-Iodoacetophenone

t= 6.7h

c= 90%

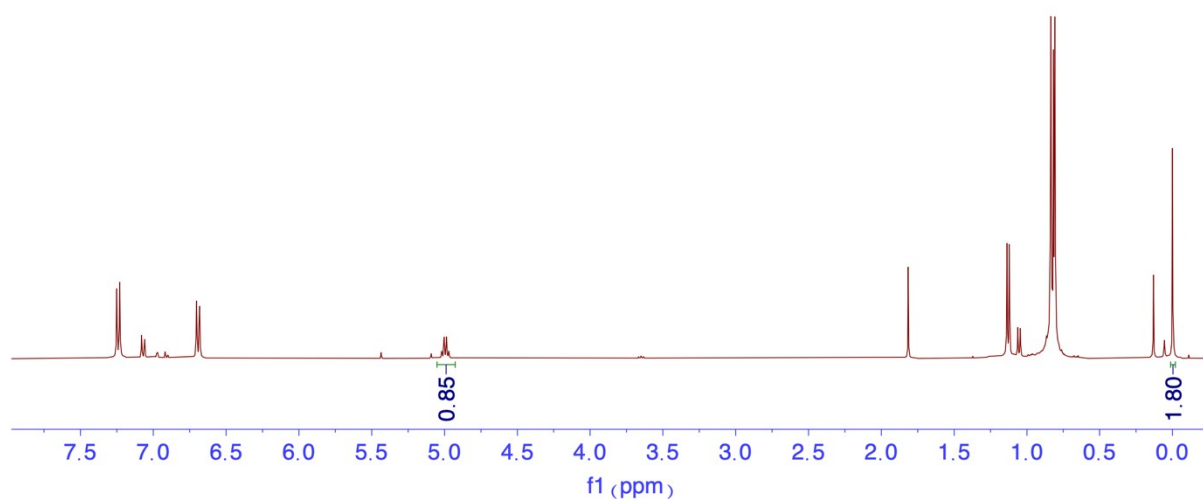

Before addition of **3** and HBpin

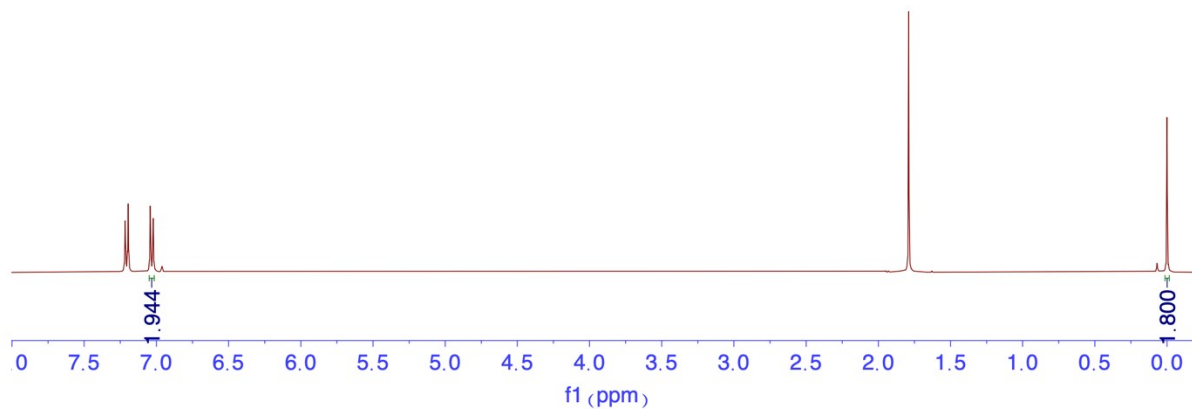

**Figure S26.** <sup>1</sup>H NMR overlay of catalytic hydroboration of 4-Iodoacetophenone with HBpin using [Ag(IDipp)HMDS] **3** (5 mol%) in C<sub>6</sub>D<sub>6</sub> at 300K

<sup>1</sup>H NMR (400.1 MHz, C<sub>6</sub>D<sub>6</sub>, 300K) δ 7.23 (2H, d), 6.69 (2H, d), 4.99 (1H, q- OCH), 1.13 (3H, d), 0.81 (12H, d, CH<sub>3</sub> OF Bpin) ppm.

<sup>11</sup>B (128.38 MHz, C<sub>6</sub>D<sub>6</sub>, 300K) δ 22.8 ppm (O-Bpin),

<sup>13</sup>C NMR (100.62 MHz, C<sub>6</sub>D<sub>6</sub>, 300K) δ 144.8, 137.6, 127.7, 92.7, 82.5, 72.3, 25.5, 24.6 ppm.

# 12a, 4-NO<sub>2</sub>-Acetophenone

t= 2h  
c= 75%

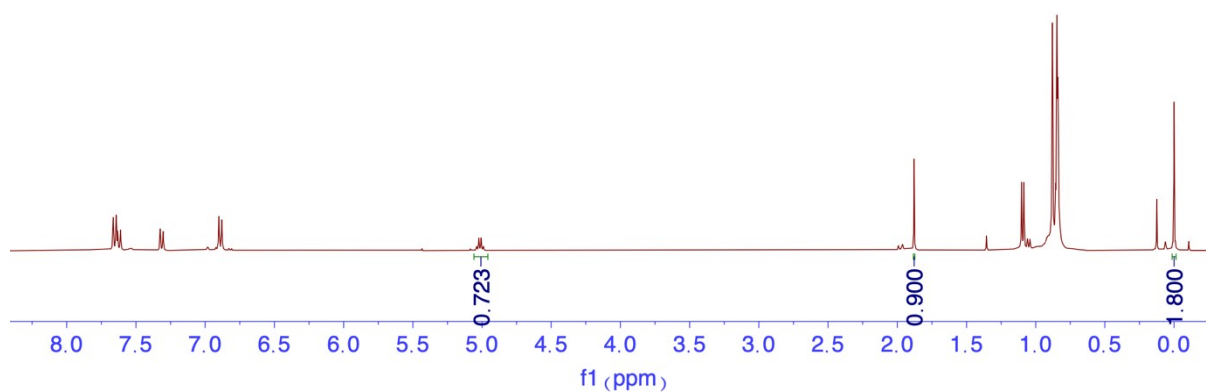

Before addition of **3** and HBpin

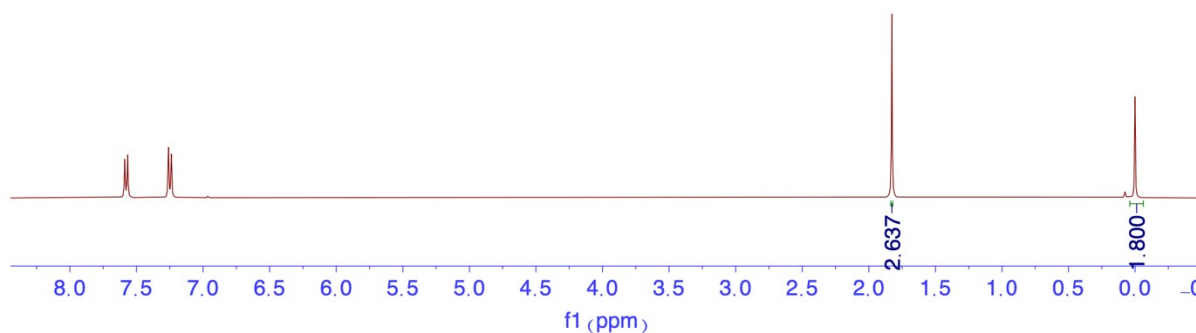

**Figure S27.** <sup>1</sup>H NMR overlay of catalytic hydroboration of 4-NO<sub>2</sub>-Acetophenone with HBpin using [Ag(IDipp)HMDS] **3** (5 mol%) in C<sub>6</sub>D<sub>6</sub> at 300K

<sup>1</sup>H NMR (400.1 MHz, C<sub>6</sub>D<sub>6</sub>, 300K) δ 7.64 (2H, d), 6.88 (2H, d), 4.99 (1H, s, OCH), 1.27 (3H, s), 1.09 (3H, s) and 1.04 (12H, s, CH<sub>3</sub> of Bpin) ppm.

<sup>11</sup>B (128.38 MHz, C<sub>6</sub>D<sub>6</sub>, 300K) δ 22.5 (O-Bpin) ppm.

# 13a, 9-Fluorenone

t= 0.7h

c= 90%

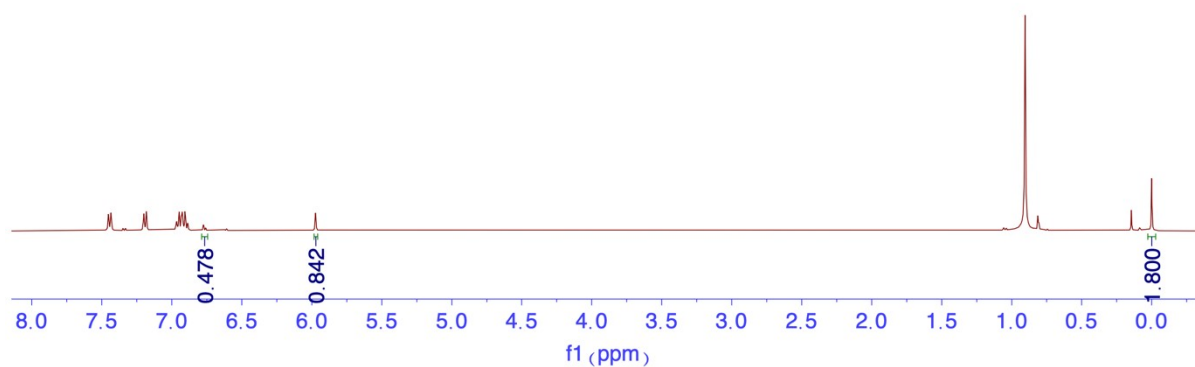

Before addition of **3** and HBpin

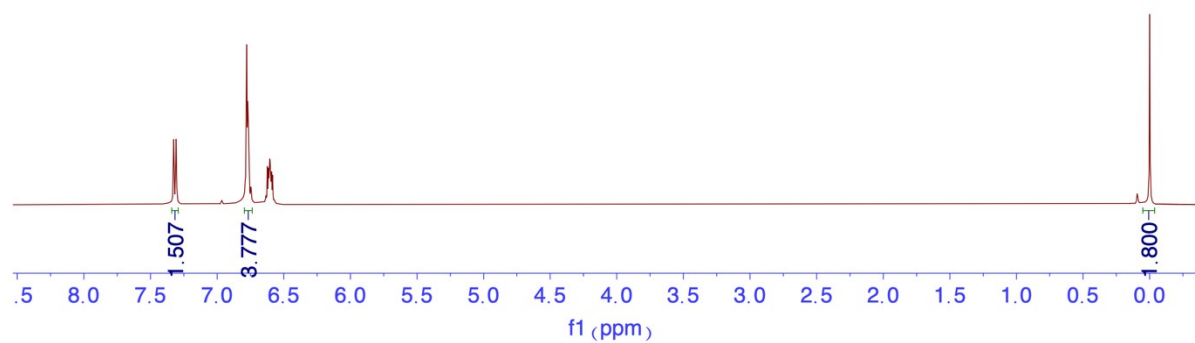

**Figure S28.**  $^1\text{H}$  NMR overlay of catalytic hydroboration of 9-Fluorenone with HBpin using [Ag(IDipp)HMDS] **3** (5 mol%) in  $\text{C}_6\text{D}_6$  at 300K

$^1\text{H}$  NMR (400.1 MHz,  $\text{C}_6\text{D}_6$ , 300K)  $\delta$  7.44 (2H, d), 7.18 (2H, d), 6.92 (4H, m), 5.97 (1H, s OCH), 0.90 (12H, s,  $\text{CH}_3$  of Bpin) ppm.

$^{11}\text{B}$  (128.38 MHz,  $\text{C}_6\text{D}_6$ , 300K)  $\delta$  23.5 (O-Bpin) ppm.

$^{13}\text{C}$  NMR (100.62 MHz,  $\text{C}_6\text{D}_6$ , 300K)  $\delta$  145.1, 140.8, 129.1, 127.8, 125.5, 120.2, 83.2, 76.7, 24.8 ( $\text{CH}_3$  of Bpin) ppm.

# 14a, Cyclopentanone

t=24h  
c=60%

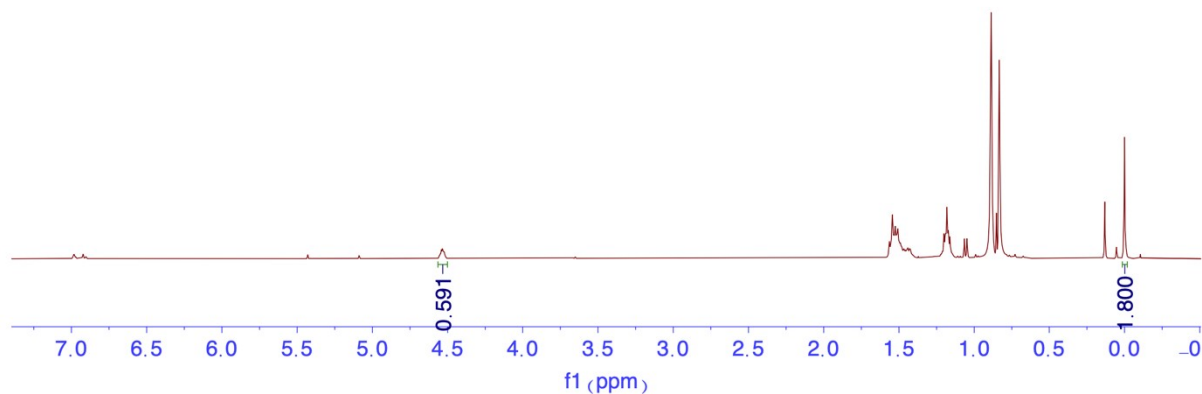

Before addition of **3** and HBpin

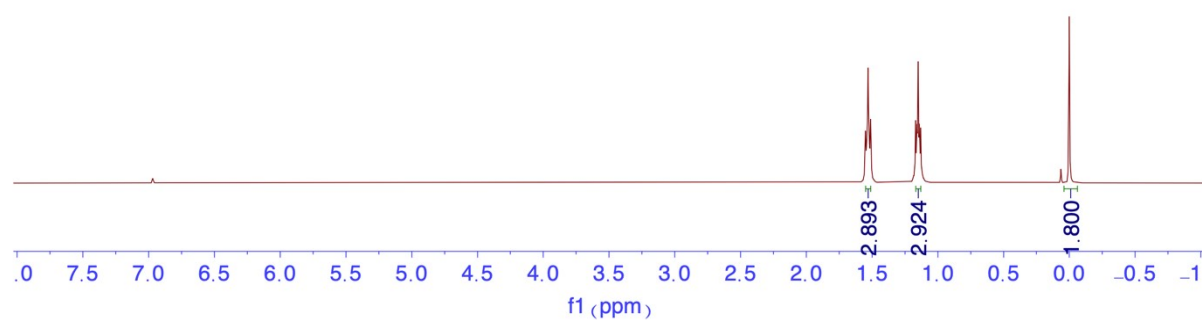

**Figure S29.**  $^1\text{H}$  NMR overlay of catalytic hydroboration of cyclopentanone with HBpin using [Ag(IDipp)HMDS] **3** (5 mol%) in  $\text{C}_6\text{D}_6$  at 300K

$^1\text{H}$  NMR (400.1 MHz,  $\text{C}_6\text{D}_6$ , 300K)  $\delta$  4.54 (1H, m), 1.59-1.38 (6H, m), 1.20-1.15 (2H, m), 0.86 (12H, s,  $\text{CH}_3$  of Bpin)

$^{11}\text{B}$  (128.38 MHz,  $\text{C}_6\text{D}_6$ , 300K)  $\delta$  22.5 ppm (O-Bpin)

# Catalytic hydrosilylation using **3**

Table S3: Carbonyl hydrosilylation using Ph<sub>2</sub>SiH<sub>2</sub>, catalysed by [Ag(Dipp)HMDS]

| Table S3. Hydrosilylation of carbonyls catalysed by <b>3</b> |         |                               |            |         |                            |
|--------------------------------------------------------------|---------|-------------------------------|------------|---------|----------------------------|
|                                                              |         |                               |            |         |                            |
| Entry                                                        | Product | <b>3</b>                      | Entry      | Product | <b>3</b>                   |
| <b>1b</b>                                                    |         | 0.5h<br>95%                   | <b>8b</b>  |         | 24h<br><20%                |
| <b>2b</b>                                                    |         | 0.5h<br>99% <sup>[b,c]</sup>  | <b>9b</b>  |         | 24h<br>96%                 |
| <b>3b</b>                                                    |         | 1h<br>99% <sup>[b,c]</sup>    | <b>10b</b> |         | 1h<br>99% <sup>[b,c]</sup> |
| <b>4b</b>                                                    |         | 0.25h<br>99% <sup>[b,c]</sup> | <b>11b</b> |         | 24h<br><5%                 |
| <b>5b</b>                                                    |         | 0.25h<br>99%                  | <b>12b</b> |         | 2h<br>84% <sup>[b,c]</sup> |
| <b>6b</b>                                                    |         | 0.7h<br>99%                   | <b>13b</b> |         | 0.7h<br>93%                |
| <b>7b</b>                                                    |         | 3h<br>99%                     | <b>14b</b> |         | 24h<br><5%                 |

% values indicate % conversion of starting material [a] Reaction conditions: substrate (1 mmol), Ph<sub>2</sub>SiH<sub>2</sub> (1.5 mmol), 5 mol% [Ag(Dipp)HMDS] (**3**) with 10 mol% internal standard hexamethylcyclotrisiloxane in C<sub>6</sub>D<sub>6</sub> at room temperature. [b] conversion of substrate. [c] yield of corresponding alcohol product after reaction quench in C<sub>6</sub>D<sub>6</sub>.

# 1b, Benzaldehyde

t= 0.5h  
c= 95%

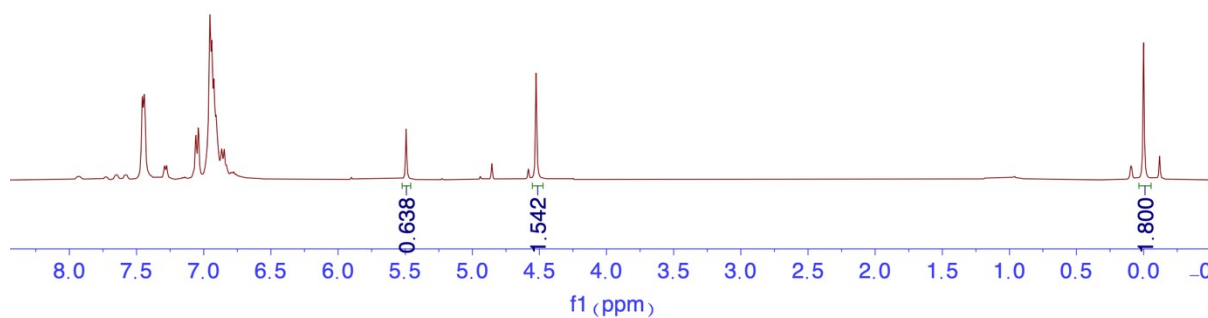

Before addition of **3** and Ph<sub>2</sub>SiH<sub>2</sub>

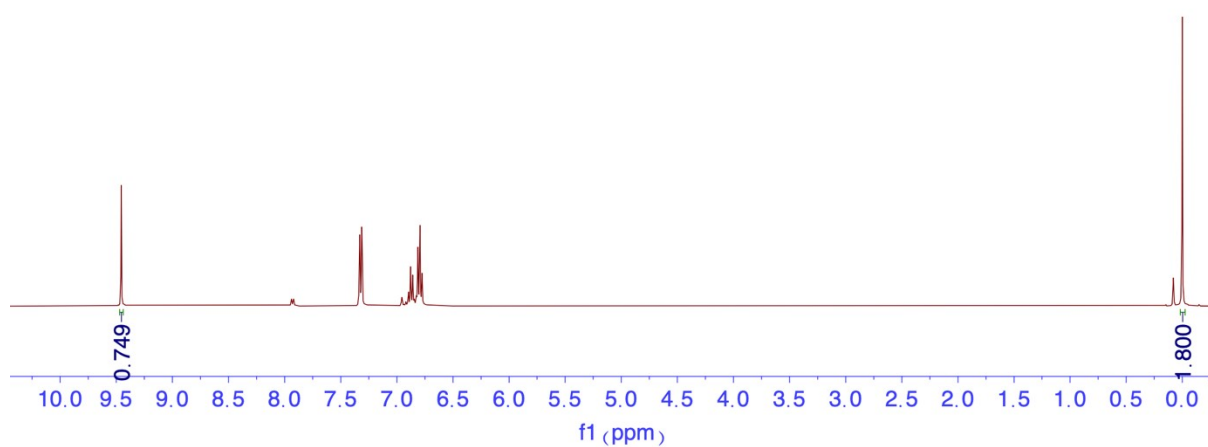

**Figure S30.** <sup>1</sup>H NMR overlay of catalytic hydrosilylation of benzaldehyde with Ph<sub>2</sub>SiH<sub>2</sub> using [Ag(IDipp)HMDS] **3** (5 mol%) in C<sub>6</sub>D<sub>6</sub> at 300K

<sup>1</sup>H NMR (400.1 MHz, C<sub>6</sub>D<sub>6</sub>, 300K) δ 7.59 – 7.50 (4H, m), 7.15 (2H, m), 7.09 – 6.92 (9H, m), 5.59 (1H, s) and 4.62 (2H, s) ppm.

<sup>13</sup>C NMR (100.62 MHz, C<sub>6</sub>D<sub>6</sub>, 300K) δ 140.6, 135.1, 134.2, 130.7, 128.6, 128.5, 127.5, 126.9 and 66.9 ppm.



## 2b, 4-Br-Benzaldehyde

t= 0.5h

c= 99%<sup>[b]</sup> 97%<sup>[c]</sup>

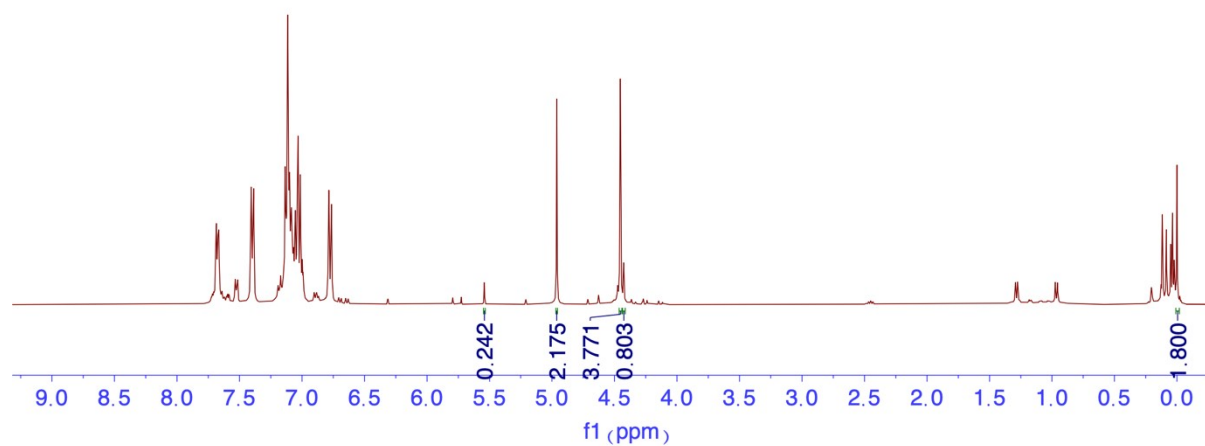

Before addition of **3** and Ph<sub>2</sub>SiH<sub>2</sub>

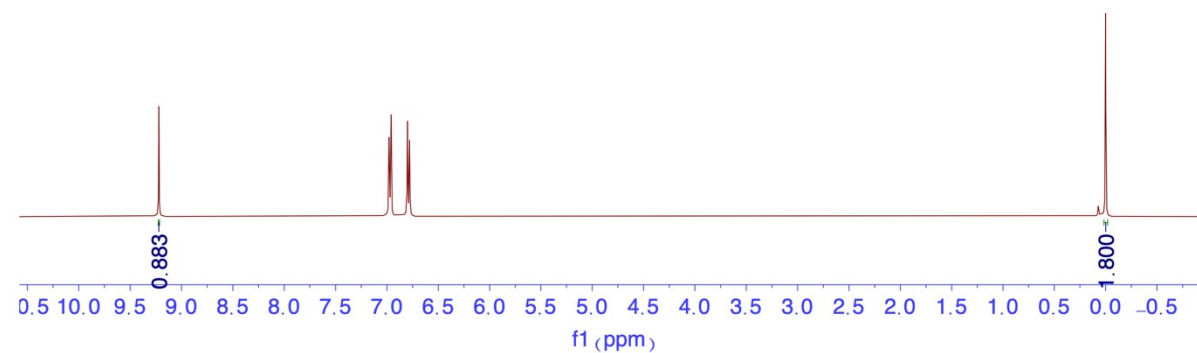

**Figure S31.** <sup>1</sup>H NMR overlay of catalytic hydrosilylation of 4-Br-Benzaldehyde with Ph<sub>2</sub>SiH<sub>2</sub> using [Ag(IDipp)HMDS] **3** (5 mol%) in C<sub>6</sub>D<sub>6</sub> at 300K

Mixture of products - reaction quenched with TBAF.

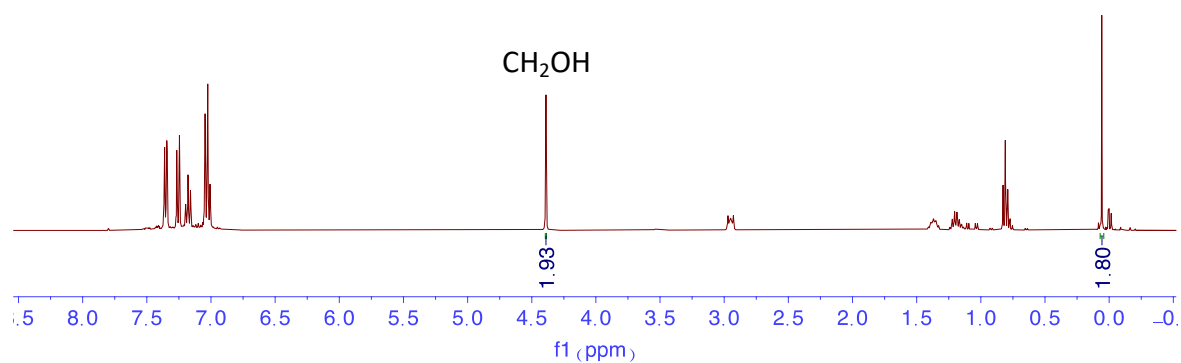

**Figure S32.**  $^1\text{H}$  NMR of organic product following a quench of the catalytic hydrosilylation reaction of 4-Br-benzaldehyde with  $\text{Ph}_2\text{SiH}_2$  using **3** (5 mol%) in  $\text{CDCl}_3$  at 300K.

## 3b, 4-CN-Benzaldehyde

t= 1h

c= 99%<sup>[b]</sup> 60%<sup>[c]</sup>

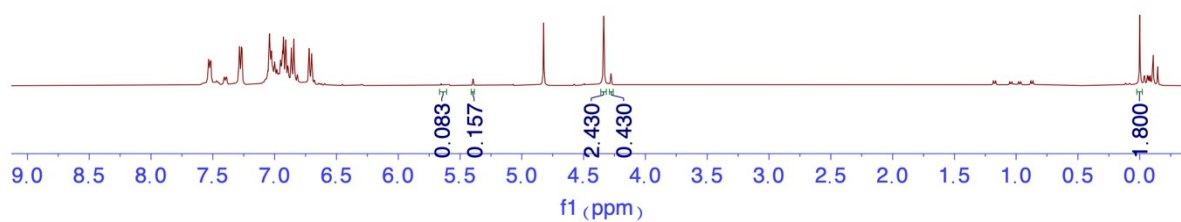

Before addition of **3** and Ph<sub>2</sub>SiH<sub>2</sub>

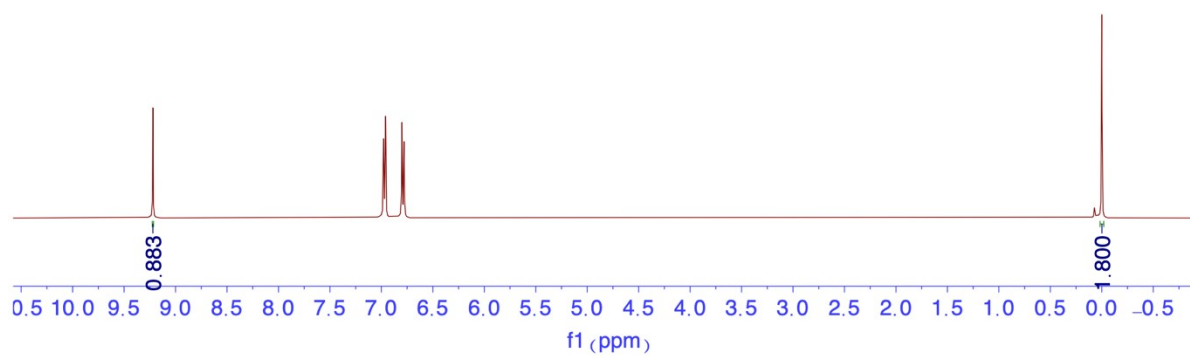

**Figure S33.** <sup>1</sup>H NMR overlay of catalytic hydrosilylation of 4-CN-Benzaldehyde with Ph<sub>2</sub>SiH<sub>2</sub> using [Ag(IDipp)HMDS] **3** (5 mol%) in C<sub>6</sub>D<sub>6</sub> at 300K

Mixture of products - reaction quenched with TBAF.

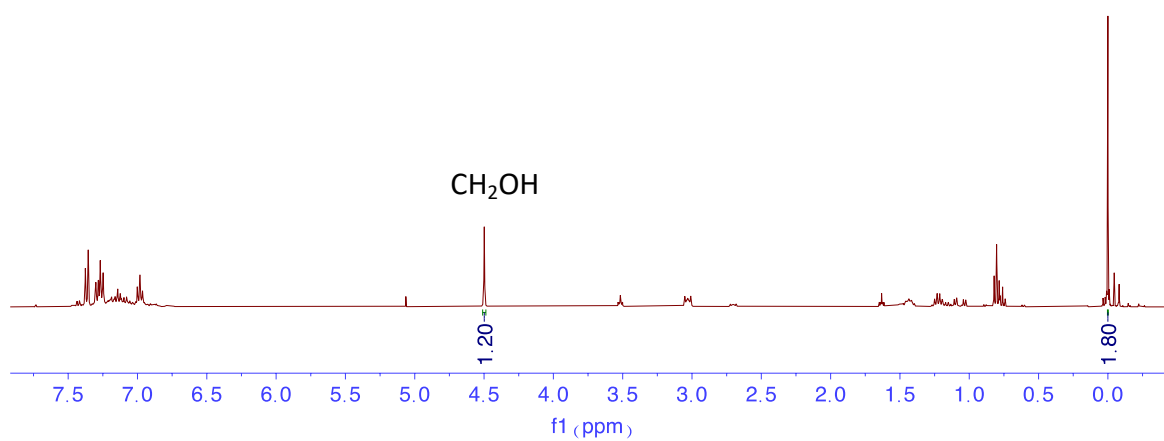

**Figure S34.**  $^1\text{H}$  NMR of organic product following a quench of the catalytic hydrosilylation reaction of 4-CN-benzaldehyde with  $\text{Ph}_2\text{SiH}_2$  using **3** (5 mol%) in  $\text{CDCl}_3$  at 300K.

## 4b, 2-CF<sub>3</sub>-Benzaldehyde

t= 0.25h

c=99%<sup>[b]</sup> 94%<sup>[c]</sup>

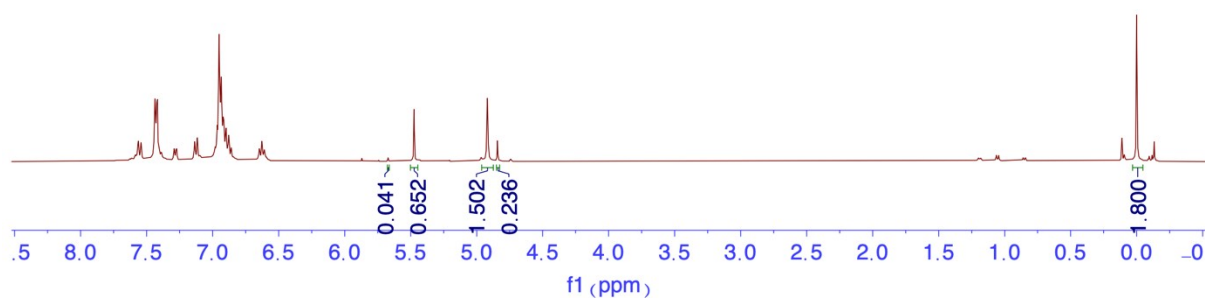

Before addition of **3** and Ph<sub>2</sub>SiH<sub>2</sub>

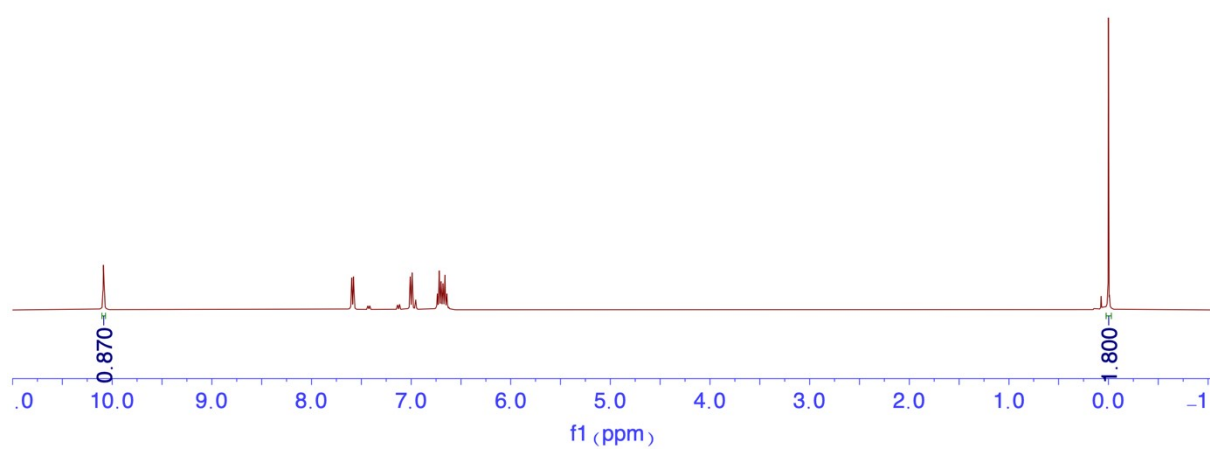

**Figure S35.** <sup>1</sup>H NMR overlay of catalytic hydrosilylation of 2-CF<sub>3</sub>-Benzaldehyde with Ph<sub>2</sub>SiH<sub>2</sub> using [Ag(IDipp)HMDS] **3** (5 mol%) in C<sub>6</sub>D<sub>6</sub> at 300K

Mixture of products - reaction quenched with TBAF.

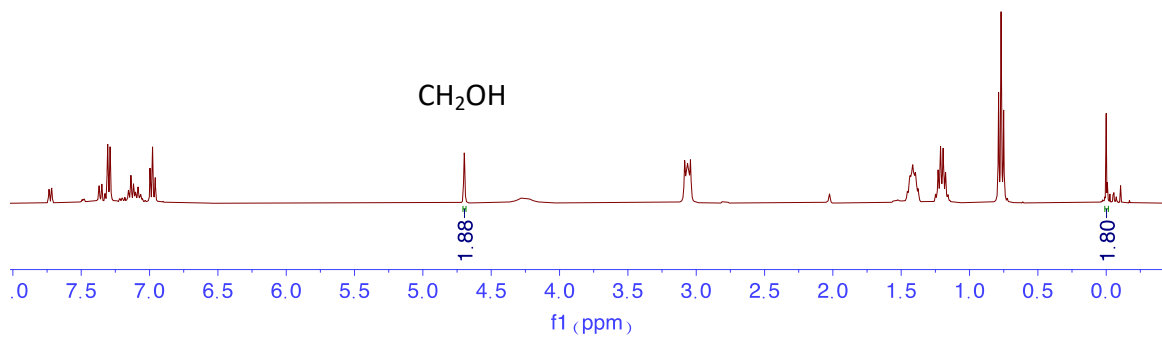

**Figure S36.** <sup>1</sup>H NMR of organic product following a quench of the catalytic hydrosilylation reaction of 2-CF<sub>3</sub>-benzaldehyde with Ph<sub>2</sub>SiH<sub>2</sub> using **3** (5 mol%) in CDCl<sub>3</sub> at 300K.

## 5b, 3-OMe-Benzaldehyde

t= 0.25h

c= 99%

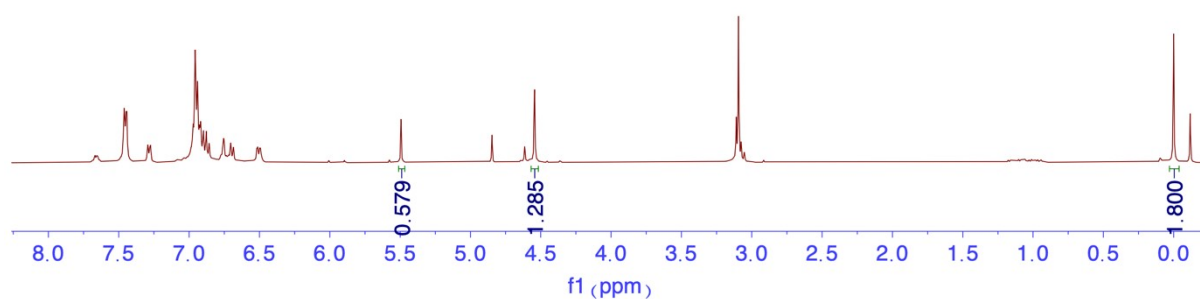

Before addition of **3** and Ph<sub>2</sub>SiH<sub>2</sub>

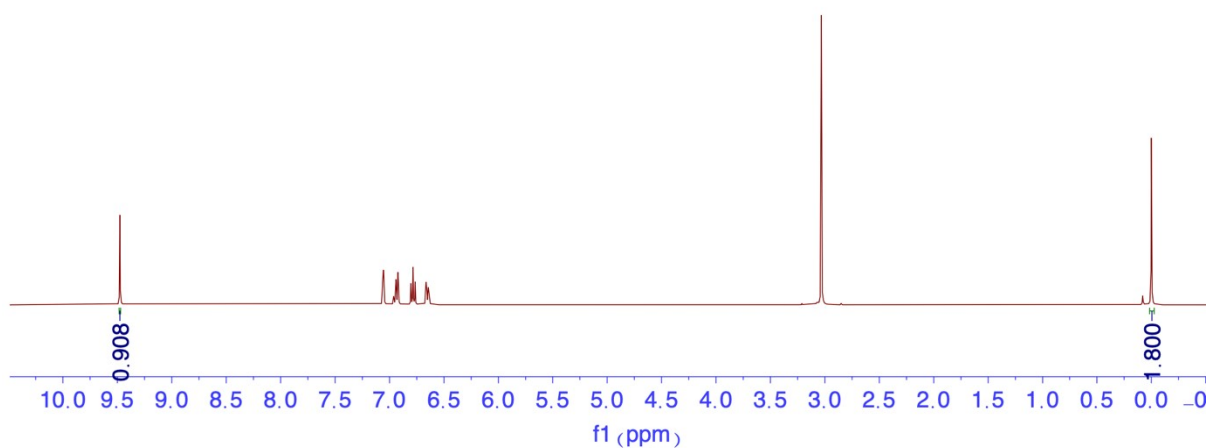

**Figure S37.** <sup>1</sup>H NMR overlay of catalytic hydrosilylation of 3-OMe-Benzaldehyde with Ph<sub>2</sub>SiH<sub>2</sub> using [Ag(IDipp)HMDS] **3** (5 mol%) in C<sub>6</sub>D<sub>6</sub> at 300K

<sup>1</sup>H NMR (400.1 MHz, C<sub>6</sub>D<sub>6</sub>, 300K) δ 7.49-7.25 (4H, m), 7.02-6.89 (7H, m), 6.75 (1H, br s), 5.46 (1H, s, Si-H), 4.52 (2H, s, CH<sub>2</sub>), 3.09 (3H, s, OCH<sub>3</sub>),

<sup>13</sup>C NMR (100.62 MHz, C<sub>6</sub>D<sub>6</sub>, 300K) δ 160.2, 142.3, 135.1, 134.2, 130.7, 129.6, 128.4, 119.1, 112.3, 66.7, 54.5

## 6b, Mesitaldehyde

t= 0.7h  
c=99%

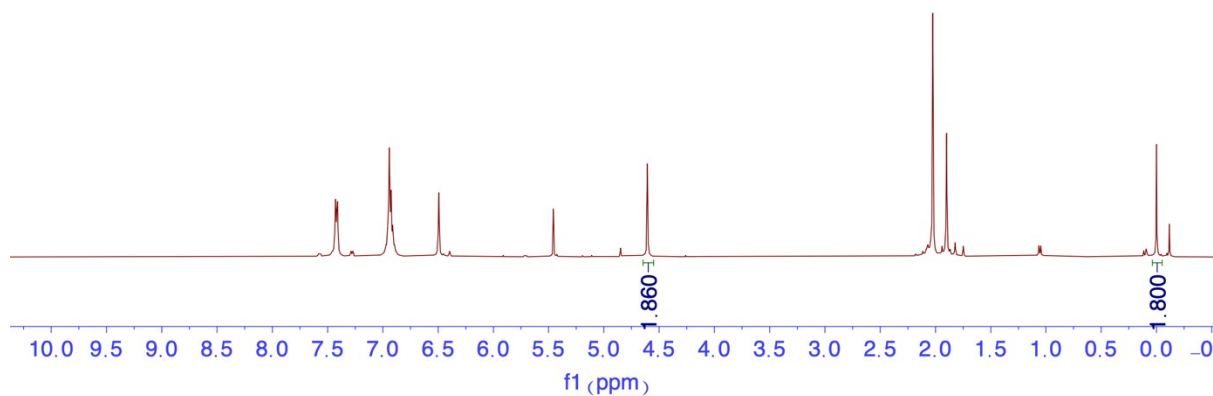

Before addition of **3** and Ph<sub>2</sub>SiH<sub>2</sub>

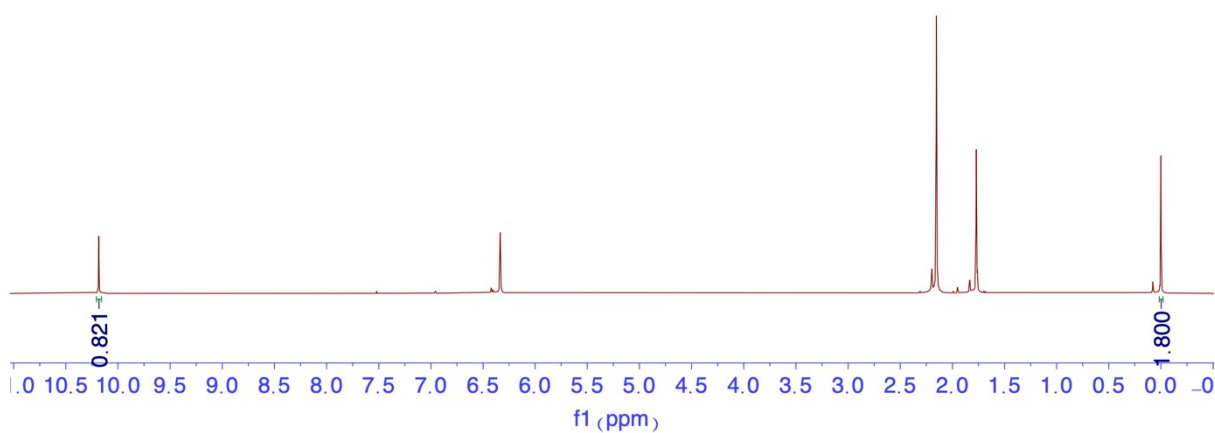

**Figure S38.** <sup>1</sup>H NMR overlay of catalytic hydrosilylation of mesitaldehyde with Ph<sub>2</sub>SiH<sub>2</sub> using [Ag(IDipp)HMDS] **3** (5 mol%) in C<sub>6</sub>D<sub>6</sub> at 300K

<sup>1</sup>H NMR (400.1 MHz, C<sub>6</sub>D<sub>6</sub>, 300K) δ d 7.45 – 7.39 (4H, m), 6.98 – 6.88 (6H, m), 6.49(2H, s), 5.45 (1H, s, Si-H), 2.02 (6H, s) and 1.90 (3H,s) ppm.

<sup>13</sup>C NMR (100.62 MHz, C<sub>6</sub>D<sub>6</sub>, 300K) δ 137.6, 137.3,135.0, 134.6, 133.4, 130.5, 129.3, 128.2, 61.4, 21.2 and 19.4 ppm.



# 7b, *t*Butylaldehyde

t= 3h  
c= 99%

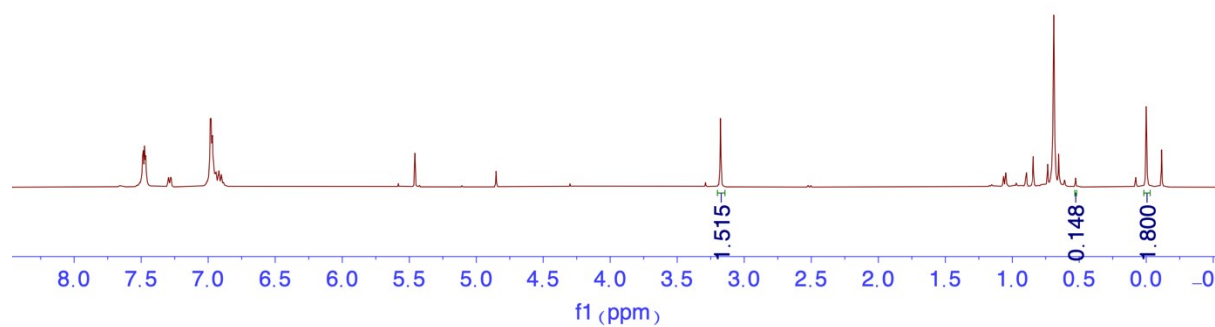

Before addition of **3** and Ph<sub>2</sub>SiH<sub>2</sub>

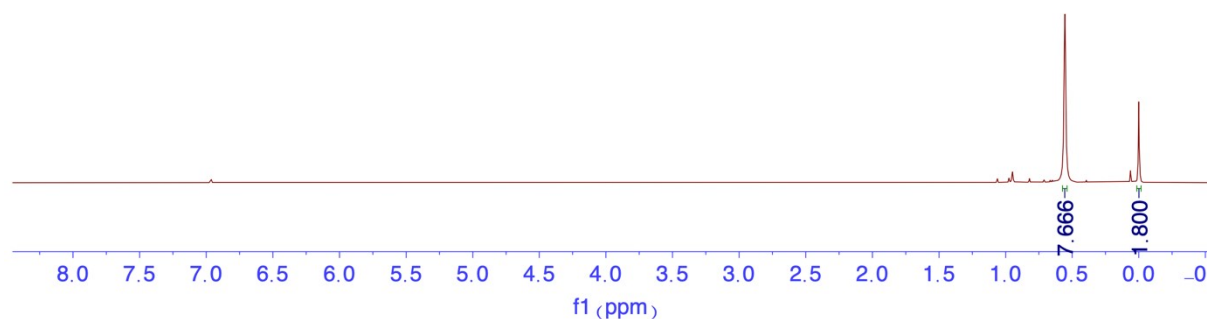

**Figure S39.** <sup>1</sup>H NMR overlay of catalytic hydrosilylation of *t*Butylaldehyde with Ph<sub>2</sub>SiH<sub>2</sub> using [Ag(IDipp)HMDS] **3** (5 mol%) in C<sub>6</sub>D<sub>6</sub> at 300K

<sup>1</sup>H NMR (400.1 MHz, C<sub>6</sub>D<sub>6</sub>, 300K) δ 7.48-7.25 (4H, m), 7.02-6.88 (6H, m), 5.44 (1H, s, SiH), 3.16 (1H,s), 0.68 (9H, s)

## 8b, Acetophenone

t= 24h,  
c=<20%

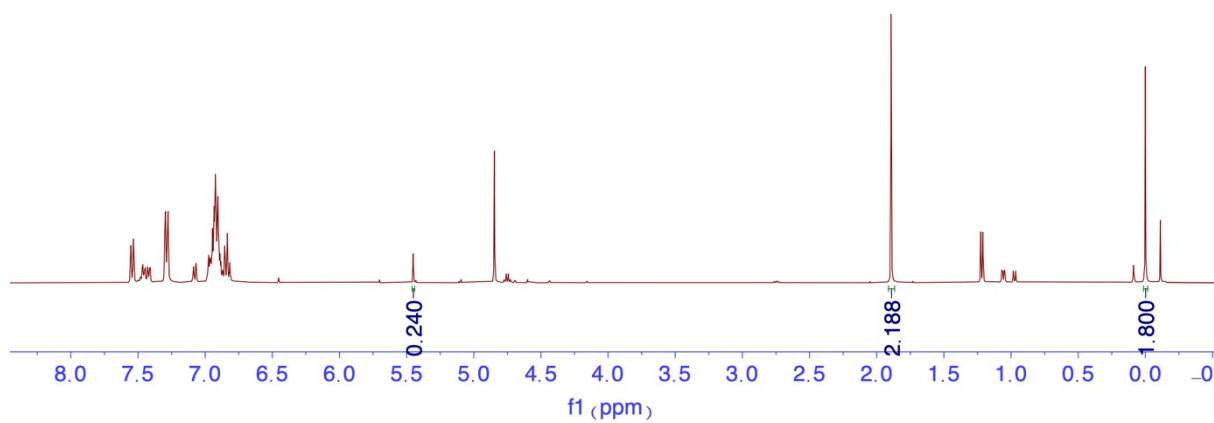

Before addition of **3** and Ph<sub>2</sub>SiH<sub>2</sub>

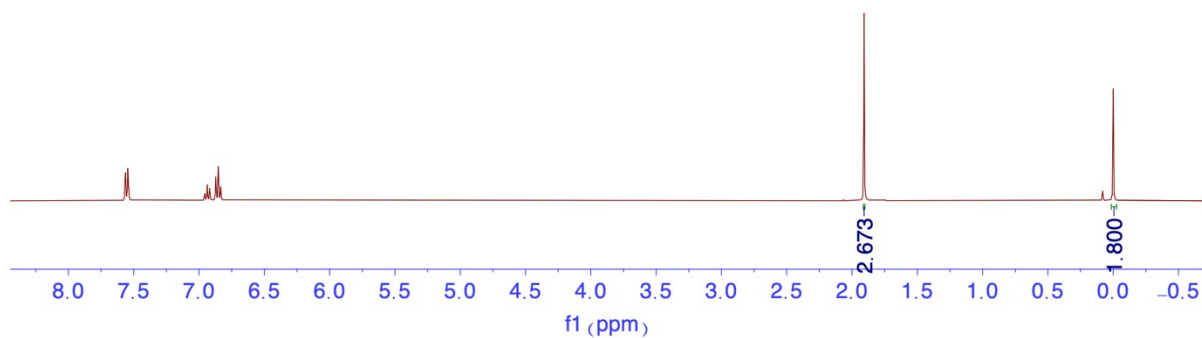

**Figure S40.** <sup>1</sup>H NMR overlay of catalytic hydrosilylation of acetophenone with Ph<sub>2</sub>SiH<sub>2</sub> using [Ag(IDipp)HMDS] **3** (5 mol%) in C<sub>6</sub>D<sub>6</sub> at 300K

## 9b, Benzophenone

t= 24h  
c=96%

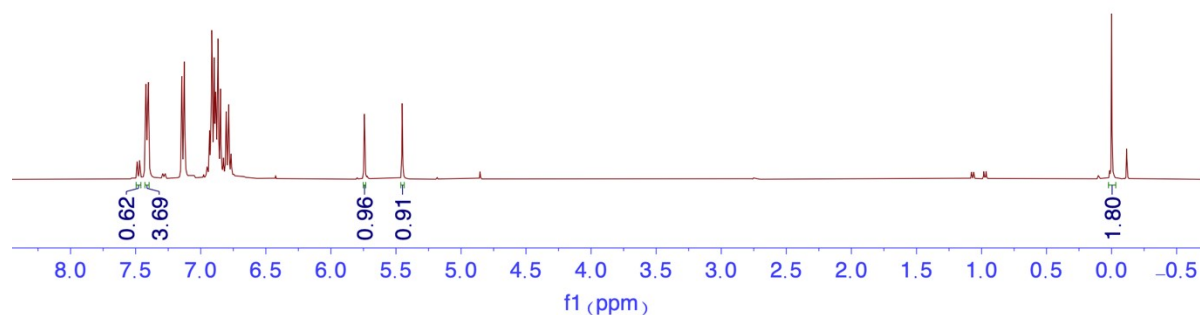

Before addition of **3** and Ph<sub>2</sub>SiH<sub>2</sub>

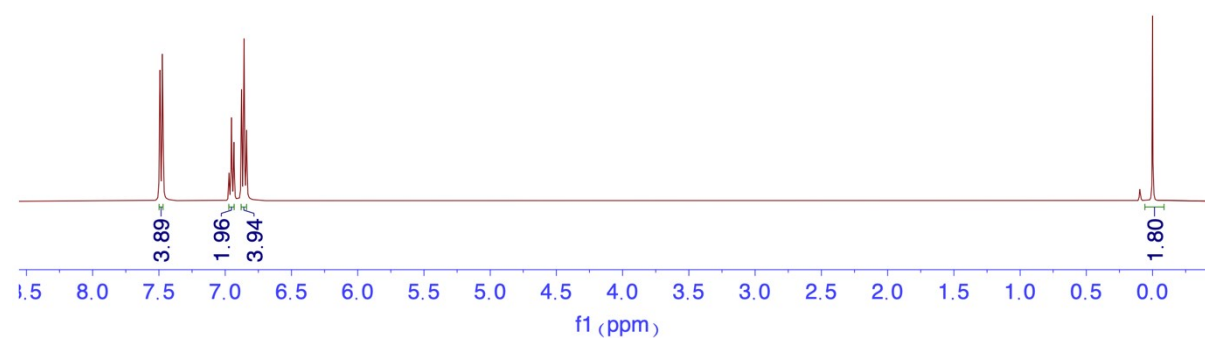

**Figure S41.** <sup>1</sup>H NMR overlay of catalytic hydrosilylation of benzophenone with Ph<sub>2</sub>SiH<sub>2</sub> using [Ag(IDipp)HMDS] **3** (5 mol%) in C<sub>6</sub>D<sub>6</sub> at 300K

<sup>1</sup>H NMR (400.1 MHz, C<sub>6</sub>D<sub>6</sub>, 300K) δ 7.41 (4H, d), 7.13 (4H, m), 6.79 (2H, tt), 5.74 (1H, s, SiH), 5.45 (1H, s) ppm.

# 10b, 2,2,2-Trifluoroacetophenone

t= 1h

c= 99%<sup>[b]</sup>, 55%<sup>[c]</sup>

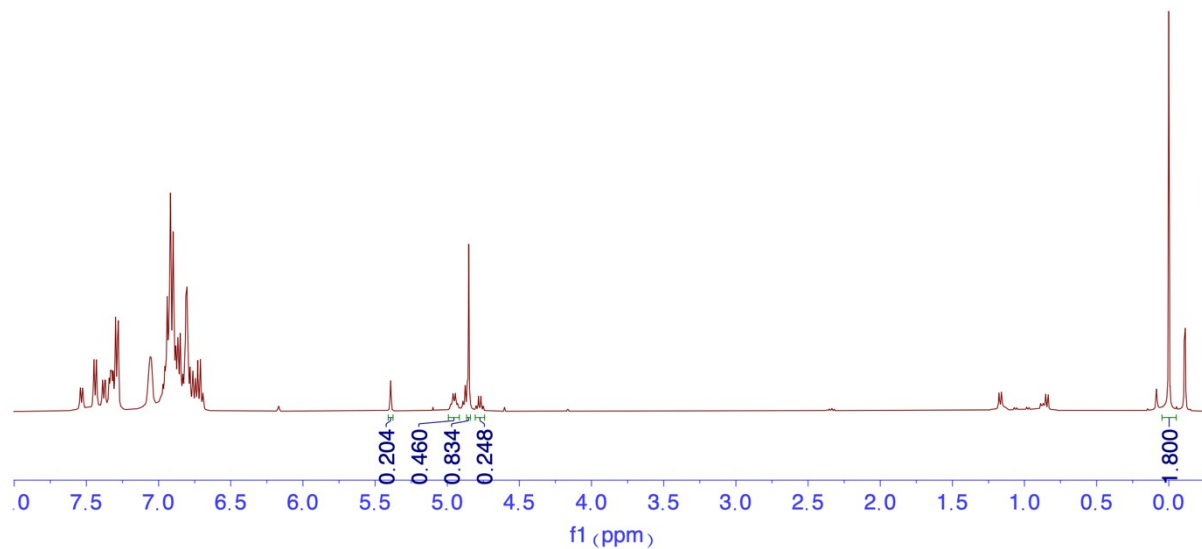

Before addition of **3** and Ph<sub>2</sub>SiH<sub>2</sub>

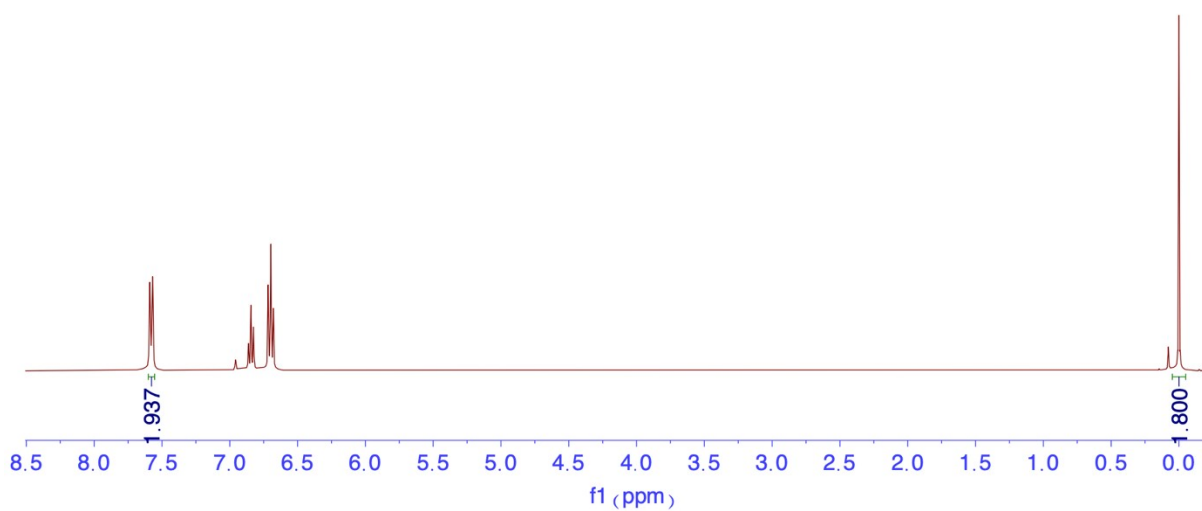

**Figure S42.** <sup>1</sup>H NMR overlay of catalytic hydrosilylation of 2,2,2-Trifluoroacetophenone with Ph<sub>2</sub>SiH<sub>2</sub> using [Ag(IDipp)HMDS] **3** (5 mol%) in C<sub>6</sub>D<sub>6</sub> at 300K

Mixture of products - reaction quenched with TBAF.

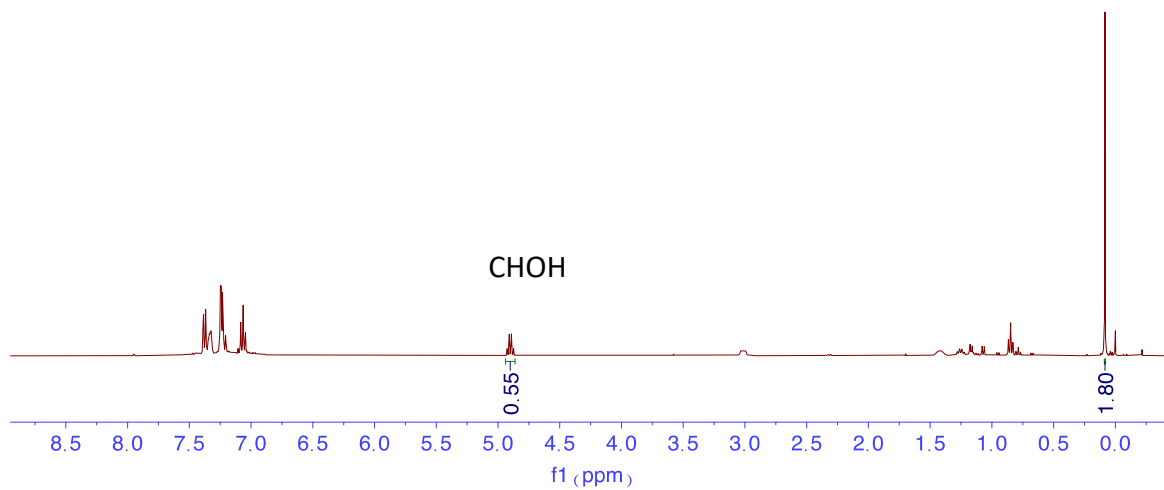

**Figure S43.** <sup>1</sup>H NMR of organic product following a quench of the catalytic hydrosilylation reaction of 2,2,2-trifluoroacetophenone with Ph<sub>2</sub>SiH<sub>2</sub> using **3** (5 mol%) in CDCl<sub>3</sub> at 300K.

# 11b, 4-Iodoacetophenone

t= ≈24h

c=<5%

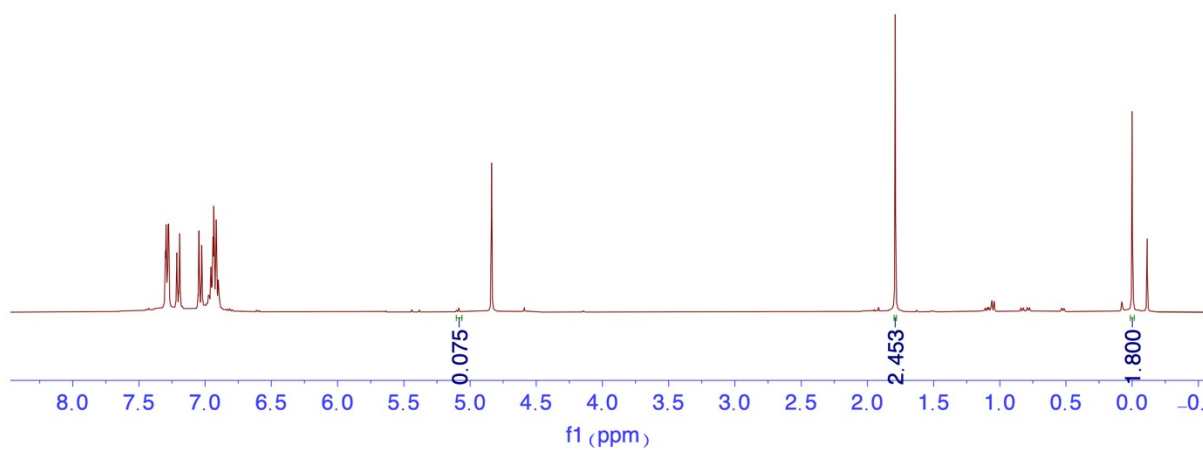

Before addition of **3** and Ph<sub>2</sub>SiH<sub>2</sub>

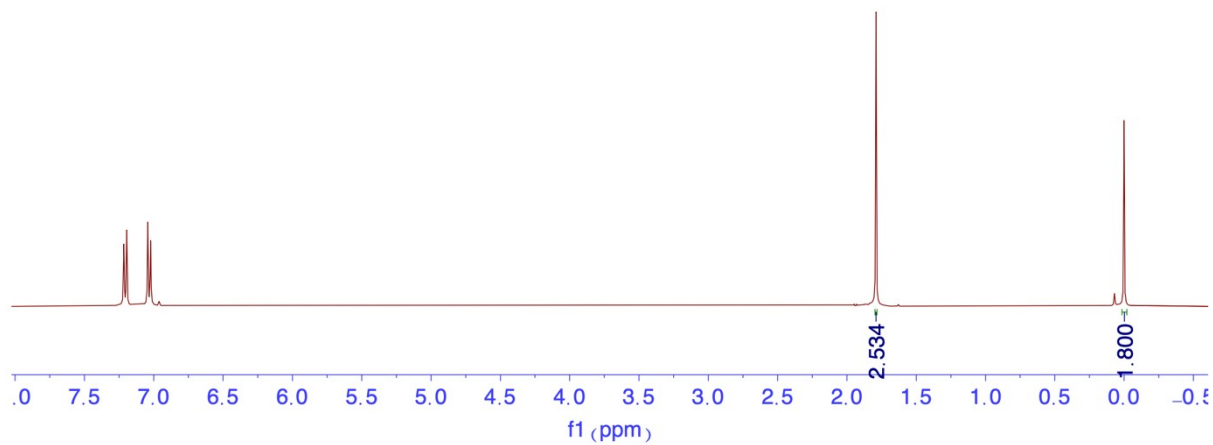

**Figure S44.** <sup>1</sup>H NMR overlay of catalytic hydrosilylation of 4-Iodoacetophenone with Ph<sub>2</sub>SiH<sub>2</sub> using [Ag(IDipp)HMDS] **3** (5 mol%) in C<sub>6</sub>D<sub>6</sub> at 300K

## 12b, 4-NO<sub>2</sub>-Acetophenone

t= 2h

c= 84%<sup>[b]</sup> 68%<sup>[c]</sup>

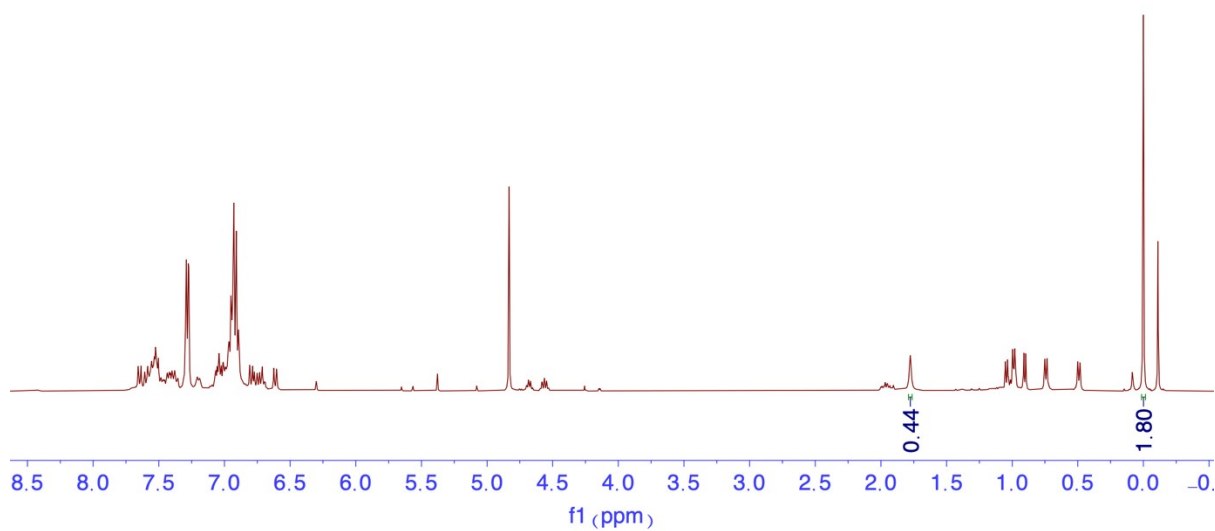

Before addition of **3** and Ph<sub>2</sub>SiH<sub>2</sub>

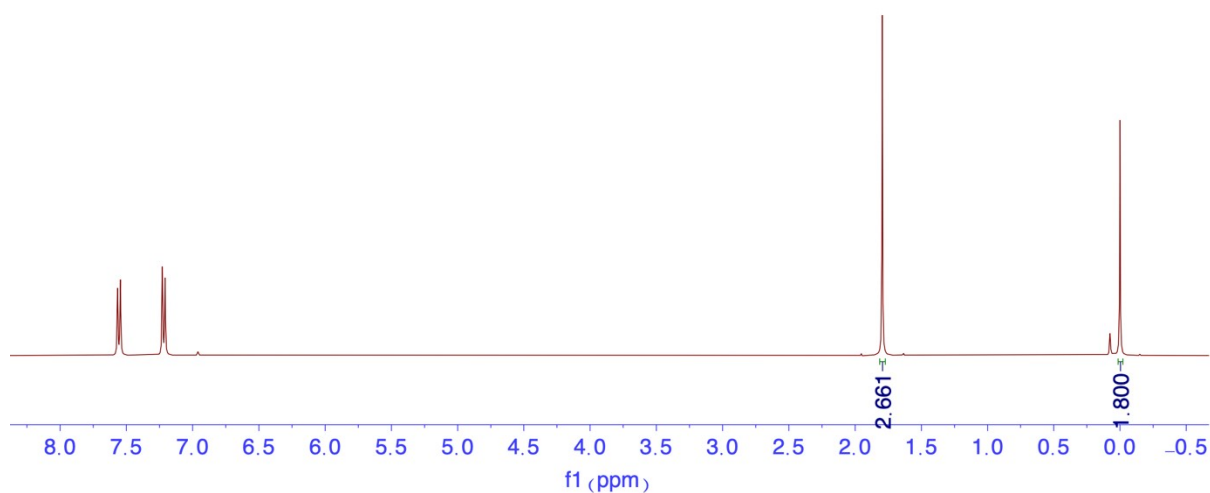

**Figure S45.** <sup>1</sup>H NMR overlay of catalytic hydrosilylation of 4-NO<sub>2</sub>-Acetophenone with Ph<sub>2</sub>SiH<sub>2</sub> using [Ag(IDipp)HMDS] **3** (5 mol%) in C<sub>6</sub>D<sub>6</sub> at 300K

Mixture of products - reaction quenched with TBAF

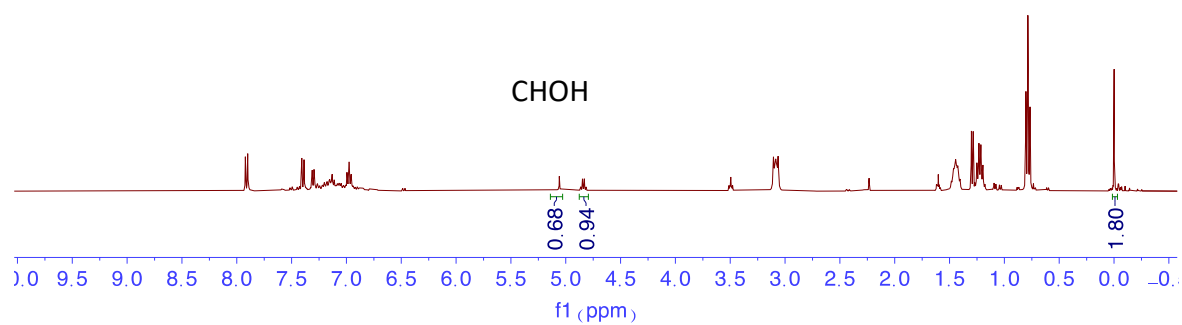

**Figure S46.**  $^1\text{H}$  NMR of organic product following a quench of the catalytic hydrosilylation reaction of 4- $\text{NO}_2$ -acetophenone with  $\text{Ph}_2\text{SiH}_2$  using **3** (5 mol%) in  $\text{CDCl}_3$  at 300K.



## 13b, 9-Fluorenone

t= 0.7h  
c= 93%

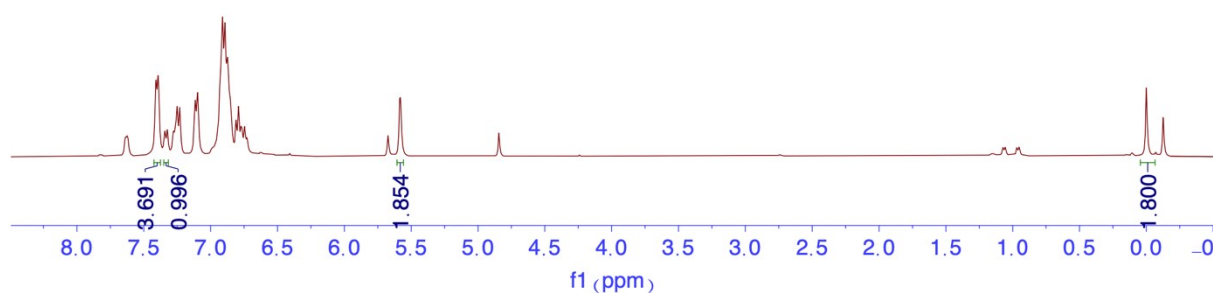

Before addition of **3** and Ph<sub>2</sub>SiH<sub>2</sub>

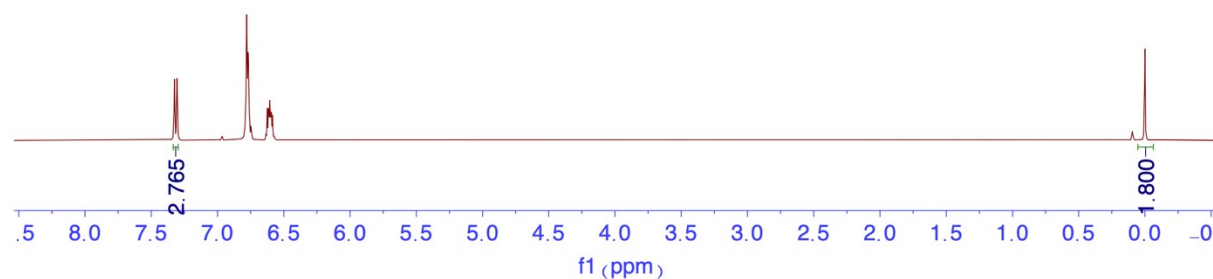

**Figure S47.** <sup>1</sup>H NMR overlay of catalytic hydrosilylation of 9-Fluorenone with Ph<sub>2</sub>SiH<sub>2</sub> using [Ag(IDipp)HMDS] **3** (5 mol%) in C<sub>6</sub>D<sub>6</sub> at 300K

<sup>1</sup>H NMR (400.1 MHz, C<sub>6</sub>D<sub>6</sub>, 300K) δ 7.36 (4H, d, Ar-H), 7.24 (4H, d, Ar-H), 7.10 (2H, d, Ar-H), 6.98-6.70 (8H, m, Ar-H), 5.68-5.55 (2H, Si-H and O-CH)

<sup>13</sup>C NMR (100.62 MHz, C<sub>6</sub>D<sub>6</sub>, 300K) δ 140.7, 135.2, 134.6, 130.6, 129.0, 128.9, 125.9, 76.9 (CH<sub>2</sub>) ppm

## 14b, Cyclopentanone

t= 24h  
c= <5%

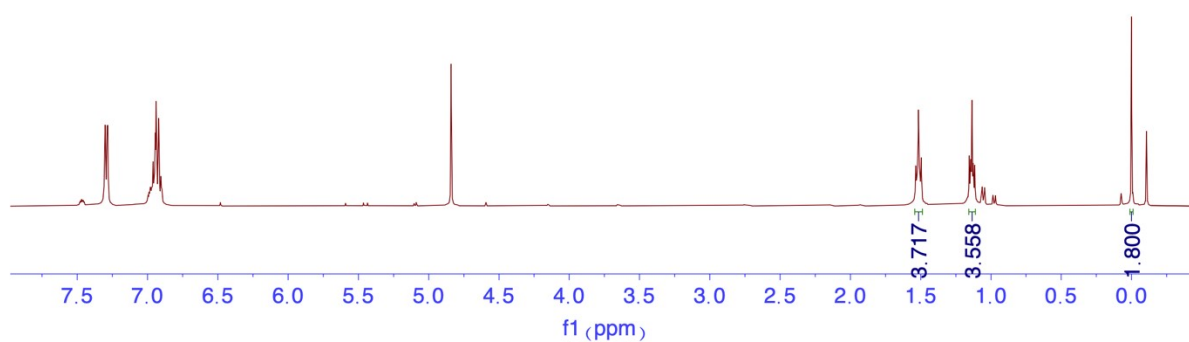

Before addition of **3** and Ph<sub>2</sub>SiH<sub>2</sub>

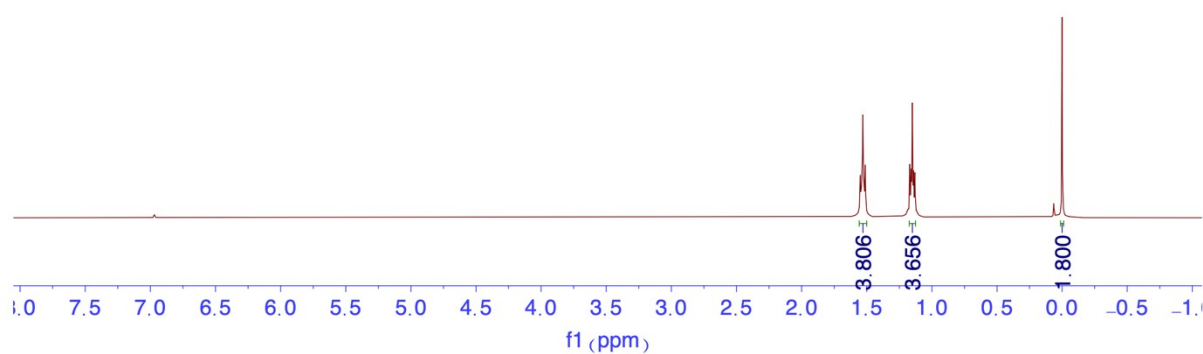

**Figure S48.** <sup>1</sup>H NMR overlay of catalytic hydrosilylation of cyclopentanone with Ph<sub>2</sub>SiH<sub>2</sub> using [Ag(IDipp)HMDS] **3** (5 mol%) in C<sub>6</sub>D<sub>6</sub> at 300K

# Catalytic hydroboration using **4**

Table S4: Carbonyl hydroboration using HBpin, catalysed by [Ag(IAd)HMDS]

| Table S4. Hydroboration of carbonyls catalysed by <b>4</b> |         |              |       |         |             |
|------------------------------------------------------------|---------|--------------|-------|---------|-------------|
|                                                            |         |              |       |         |             |
| Entry                                                      | Product | <b>4</b>     | Entry | Product | <b>4</b>    |
| 1a                                                         |         | 1h<br>95%    | 8a    |         | 24h<br>50%  |
| 2a                                                         |         | 0.25h<br>99% | 9a    |         | 5h<br>50%   |
| 3a                                                         |         | 0.25h<br>99% | 10a   |         | 0.2h<br>90% |
| 4a                                                         |         | 4h<br>51%    | 11a   |         | 24h<br>80%  |
| 5a                                                         |         | 6.5h<br>87%  | 12a   |         | 0.7h<br>99% |
| 6a                                                         |         | 24h<br>90%   | 13a   |         | 3.5h<br>70% |
| 7a                                                         |         | 2.5h<br>98%  | 14a   |         | 9h<br>60%   |

% values indicate % conversion of starting material [a] Reaction conditions: substrate (1 mmol), HBpin (1.5 mmol), 5 mol% [Ag(IAd)HMDS] (**4**) with 10 mol% internal standard hexamethylcyclotrisiloxane in C<sub>6</sub>D<sub>6</sub> at room temperature.

# 1a, Benzaldehyde

t= 1h  
c= 95%

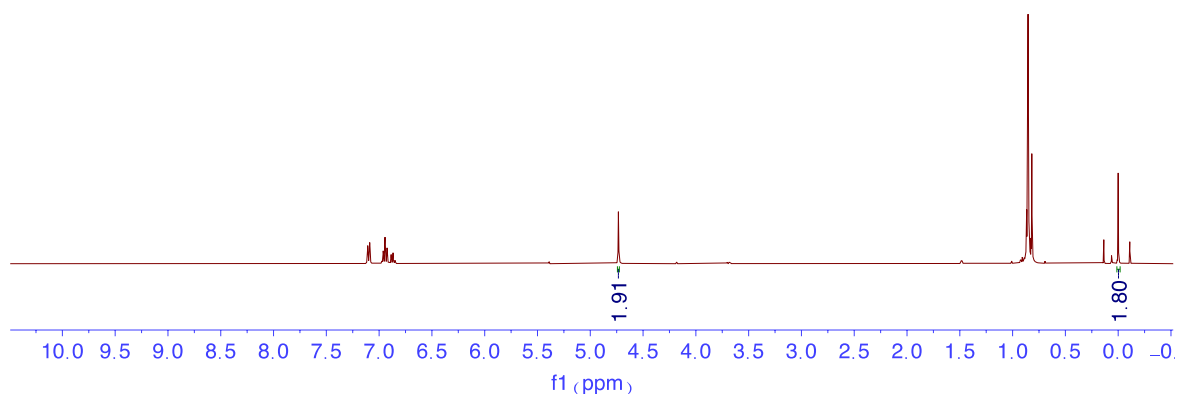

Before addition of **4** and HBpin

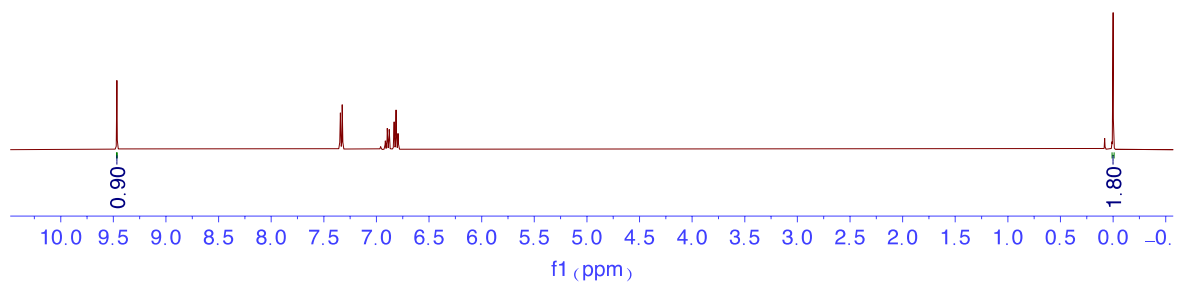

**Figure S49.**  $^1\text{H}$  NMR overlay of catalytic hydroboration of benzaldehyde with HBpin using **[Ag(IAd)HMDS] 4** (5 mol%) in  $\text{C}_6\text{D}_6$  at 300K

$^1\text{H}$  NMR (400.1 MHz,  $\text{C}_6\text{D}_6$ , 300K)  $\delta$  7.31 (2H, d), 7.16 (2H, t), 7.08 (1H, m), 4.94 (2H, s) and 1.07 (12H, s) ppm.

$^{11}\text{B}$  (128.38 MHz,  $\text{C}_6\text{D}_6$ , 300K)  $\delta$  22.9 ppm (O-Bpin) ppm.

$^{13}\text{C}$  NMR (100.62 MHz,  $\text{C}_6\text{D}_6$ , 300K)  $\delta$  139.0 (quat-C), 127.6, (Ar-C), 126.6 (Ar-C), 126.1 (Ar-C), 82.0 (C of Bpin), 65.9 (C-H) and 23.9 ( $\text{CH}_3$  of Bpin) ppm.

## 2a, 4-Br-Benzaldehyde

t= 0.25h

c= 99%

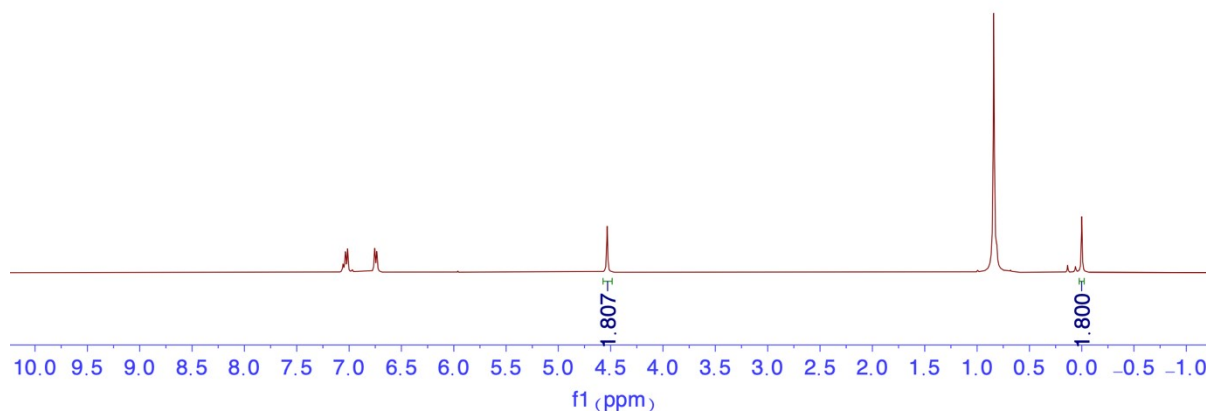

Before addition of **4** and HBpin

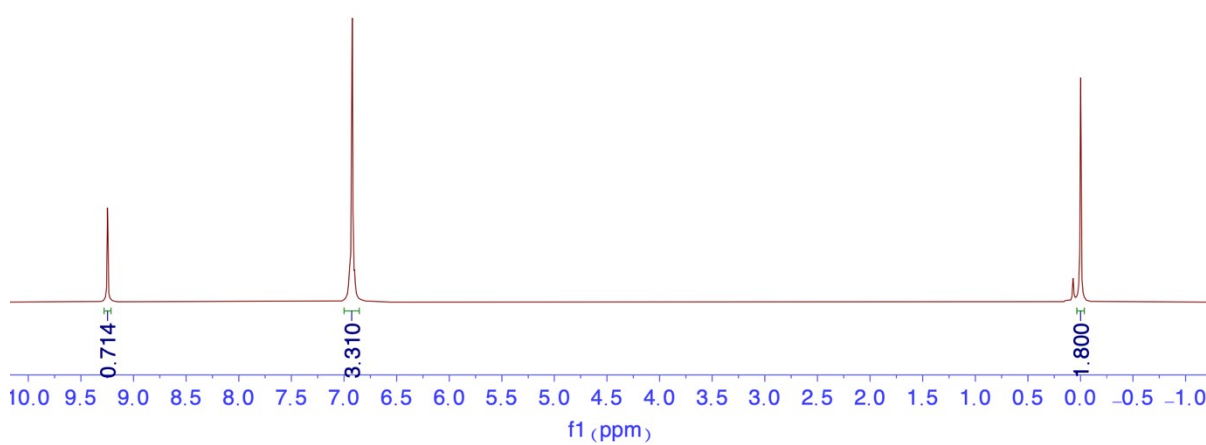

**Figure S50.**  $^1\text{H}$  NMR overlay of catalytic hydroboration of 4-Br-Benzaldehyde with HBpin using **[Ag(IAd)HMDS] 4** (5 mol%) in  $\text{C}_6\text{D}_6$  at 300K

$^1\text{H}$  NMR (400.1 MHz,  $\text{C}_6\text{D}_6$ , 300K)  $\delta$  7.05 (2H, t), 6.74 (2H, d), 7.06 (1H, m), 4.51 (2H, s) and 0.84 (12H, s,  $\text{CH}_3$  of Bpin) ppm.

$^{11}\text{B}$  (128.38 MHz,  $\text{C}_6\text{D}_6$ , 300K)  $\delta$  22.6 ppm (O-Bpin)

## 3a, 4-CN-Benzaldehyde

t= 0.25h  
c=99%

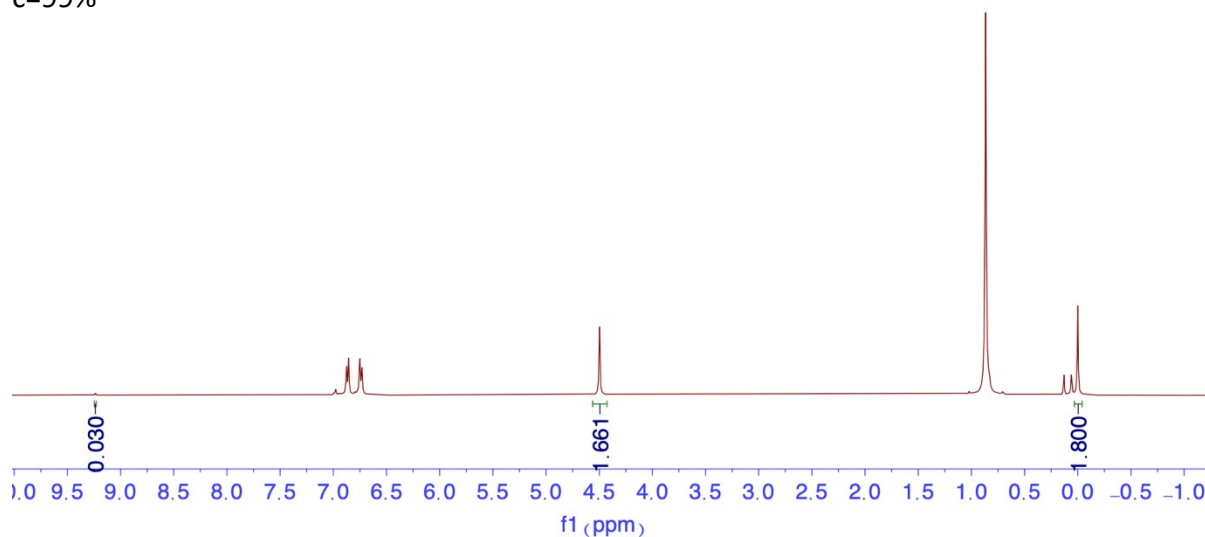

Before addition of **4** and HBpin

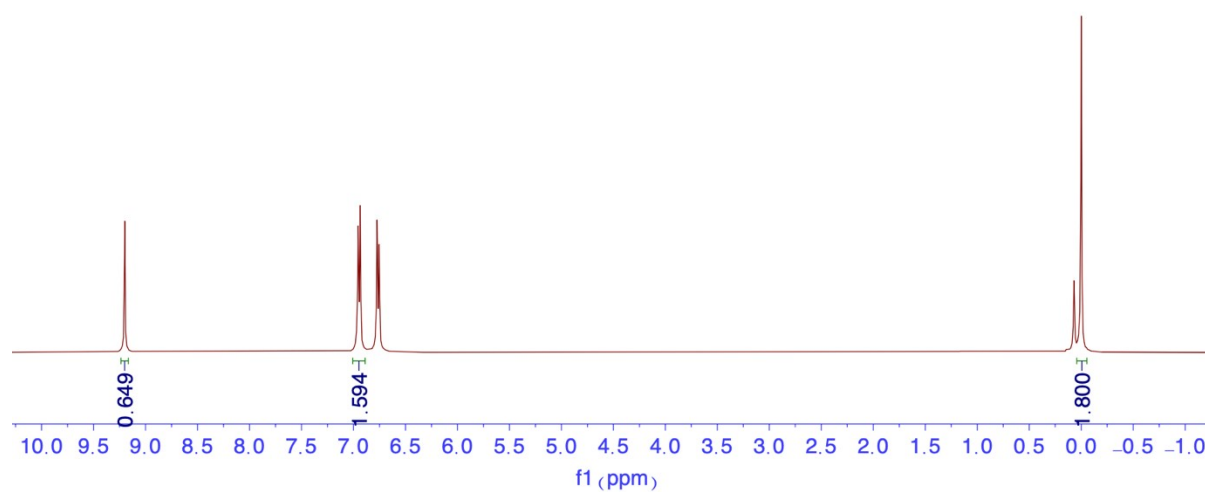

**Figure S51.** <sup>1</sup>H NMR overlay of catalytic hydroboration of 4-CN-Benzaldehyde with HBpin using [Ag(IAd)HMDS] **4** (5 mol%) in C<sub>6</sub>D<sub>6</sub> at 300K

<sup>1</sup>H NMR (400.1 MHz, C<sub>6</sub>D<sub>6</sub>, 300K) δ 6.85 (2H, d), 6.75 (2H, d), 4.50 (2H, s), 0.85 (12H, s, CH<sub>3</sub>-of Bpin) ppm.

<sup>11</sup>B (128.38 MHz, C<sub>6</sub>D<sub>6</sub>, 300K) δ 22.6 ppm (O-Bpin)

## 4a, 2-CF<sub>3</sub>-Benzaldehyde

t= 4h  
c= 51%

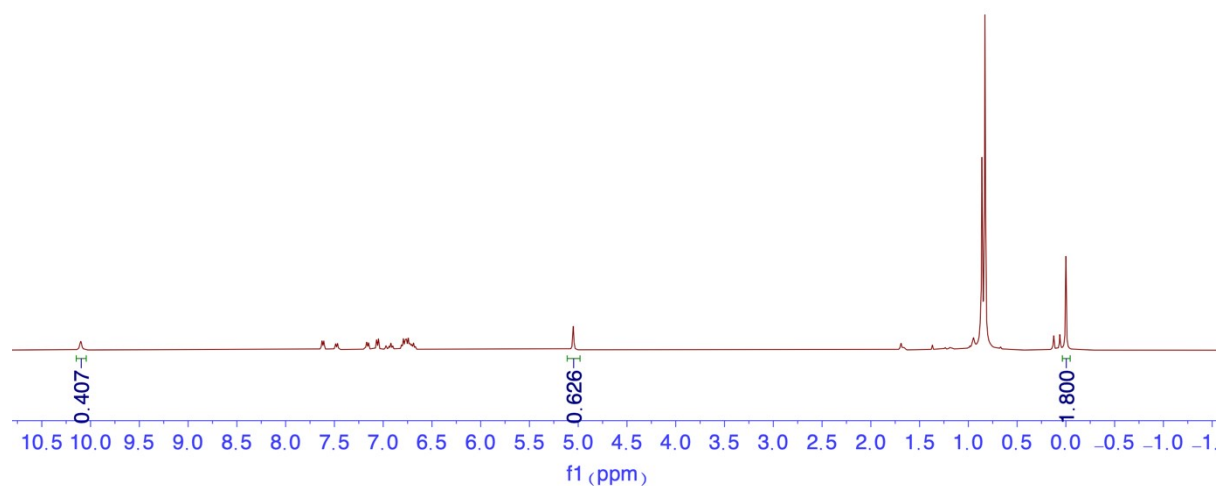

Before addition of **4** and HBpin

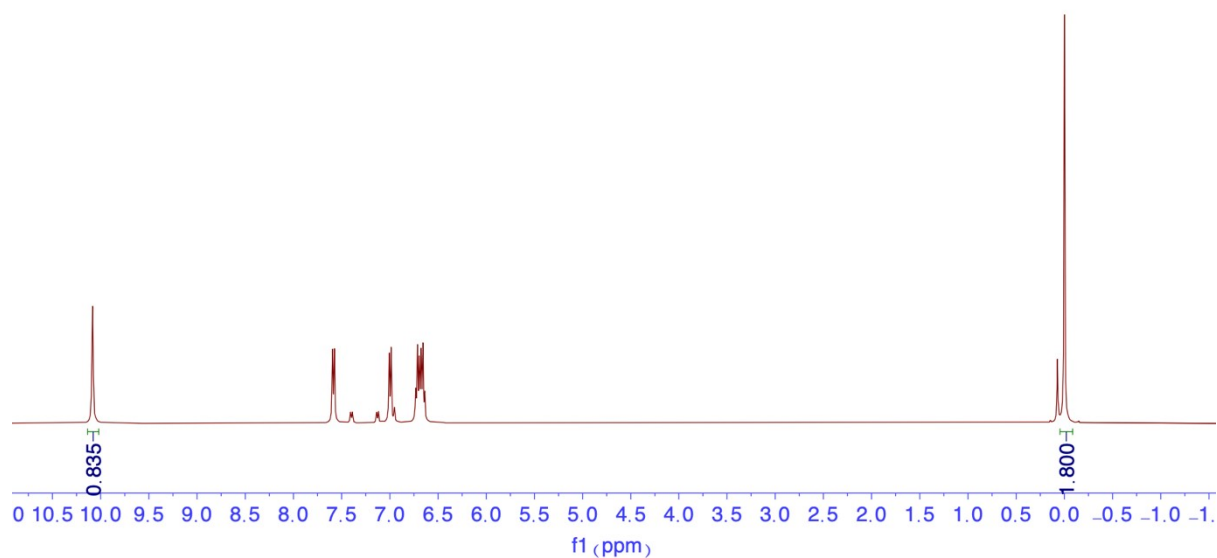

**Figure S52.** <sup>1</sup>H NMR overlay of catalytic hydroboration of 2-CF<sub>3</sub>-Benzaldehyde with HBpin using [Ag(IAd)HMDS] **4** (5 mol%) in C<sub>6</sub>D<sub>6</sub> at 300K

<sup>1</sup>H NMR (400.1 MHz, C<sub>6</sub>D<sub>6</sub>, 300K) δ 7.64-7.46 (1H, m), 7.20-7.02 (1H, m), 6.93 (1H, t), 6.75 (1H, t), 5.05 (2H, s), 0.82 (12H, s) ppm.

<sup>11</sup>B (128.38 MHz, C<sub>6</sub>D<sub>6</sub>, 300K) δ 22.6 (O-Bpin) ppm

## 5a, 3-OMe-Benzaldehyde

t= 6.5h

c= 87%

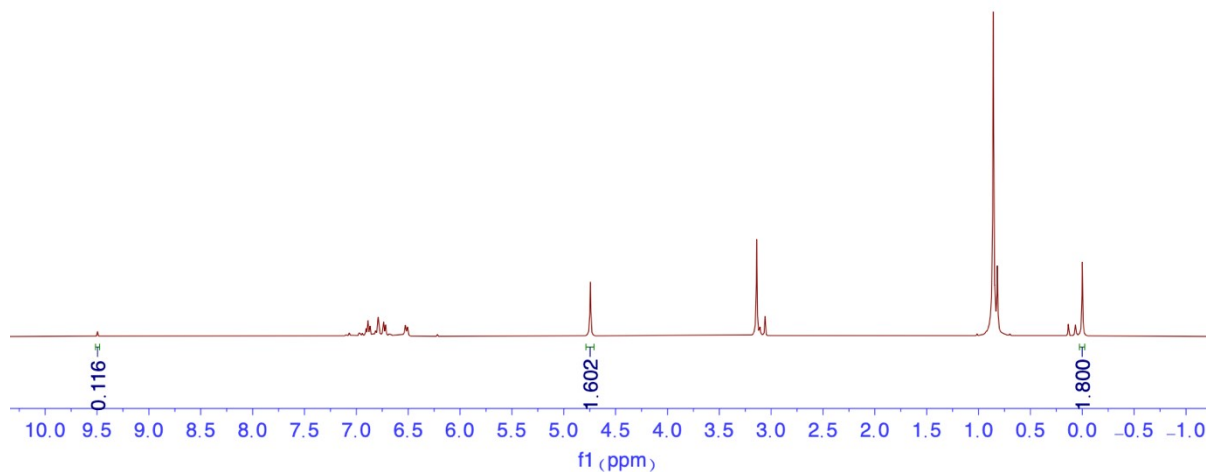

Before addition of **4** and HBpin

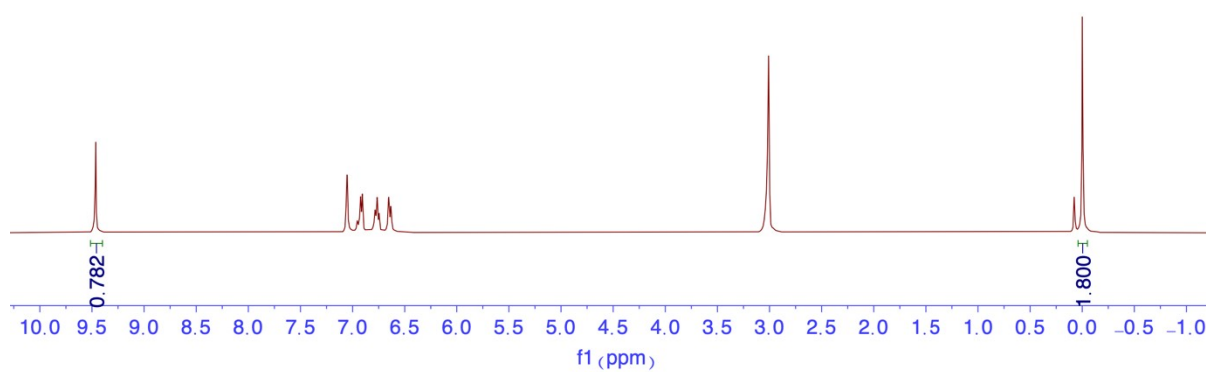

**Figure S53.** <sup>1</sup>H NMR overlay of catalytic hydroboration of 3-OMe-Benzaldehyde with HBpin using [Ag(IAd)HMDS] **4** (5 mol%) in C<sub>6</sub>D<sub>6</sub> at 300K

<sup>1</sup>H NMR (400.1 MHz, C<sub>6</sub>D<sub>6</sub>, 300K) δ 6.89 (1H, t), 6.78 (1H, m), 6.72 (1H, d), 6.51 (1H, dd), 4.52 (2H, s), 3.05 (3H, s), 0.85 (12H, s) ppm.

<sup>11</sup>B (128.38 MHz, C<sub>6</sub>D<sub>6</sub>, 300K) δ 22.5 ppm (O-Bpin)



## 6a, Mesitaldehyde

t= 24h  
c= 90%

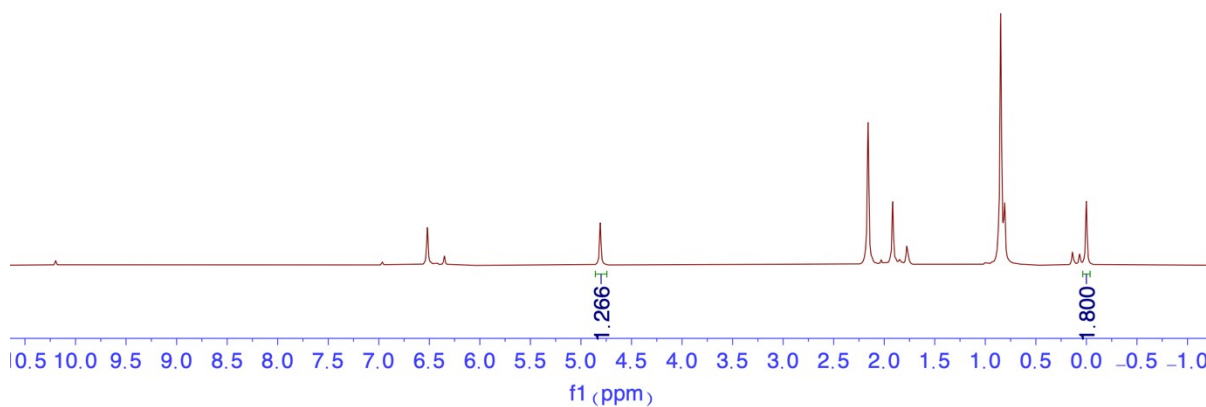

Before addition of **4** and HBpin

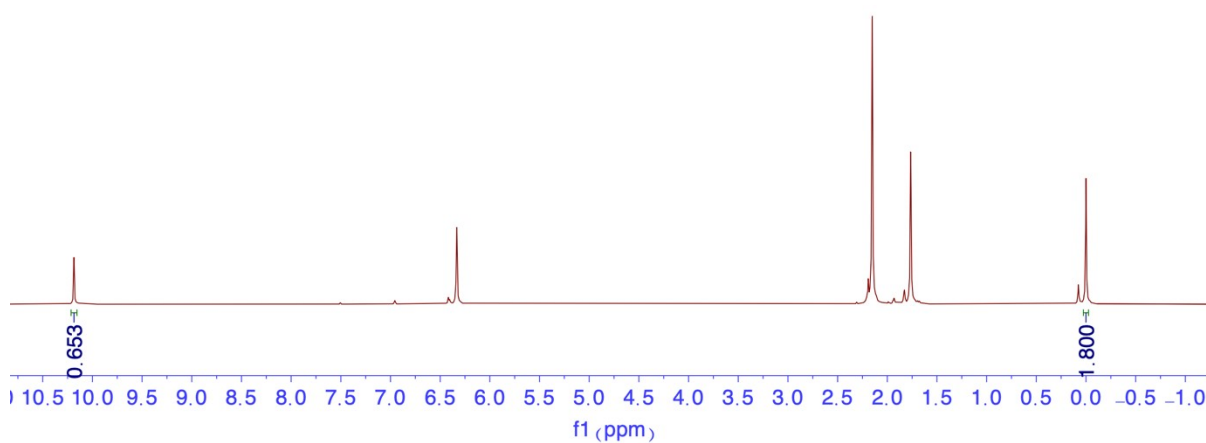

**Figure S54.**  $^1\text{H}$  NMR overlay of catalytic hydroboration of mesitaldehyde with HBpin using [Ag(IAd)HMDS] **4** (5 mol%) in  $\text{C}_6\text{D}_6$  at 300K

$^1\text{H}$  NMR (400.1 MHz,  $\text{C}_6\text{D}_6$ , 300K)  $\delta$  6.52 (2H, s), 4.81 (2H, s), 2.15 (6H, s), 1.91 (3H, s), 0.87 (12H, s) ppm.

$^{11}\text{B}$  (128.38 MHz,  $\text{C}_6\text{D}_6$ , 300K)  $\delta$  22.6 (O-Bpin) ppm.

$^{13}\text{C}$  NMR (100.62 MHz,  $\text{C}_6\text{D}_6$ , 300K)  $\delta$  137.7, 132.7, 129.3, 82.5, 61.5, 24.5, 20.8, 19.4 ppm.

# 7a, *t*Butylaldehyde

t=2.5h  
c=98%

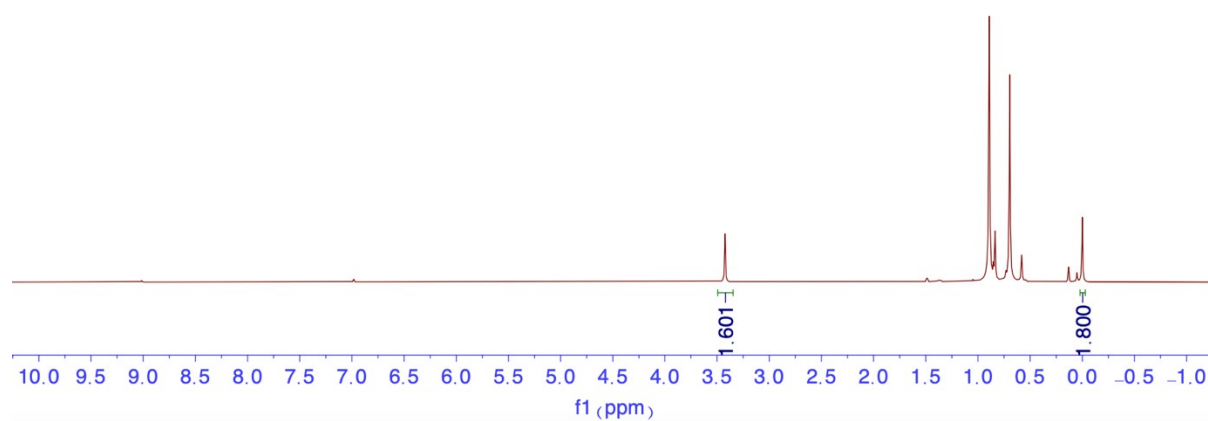

Before addition of **4** and HBpin

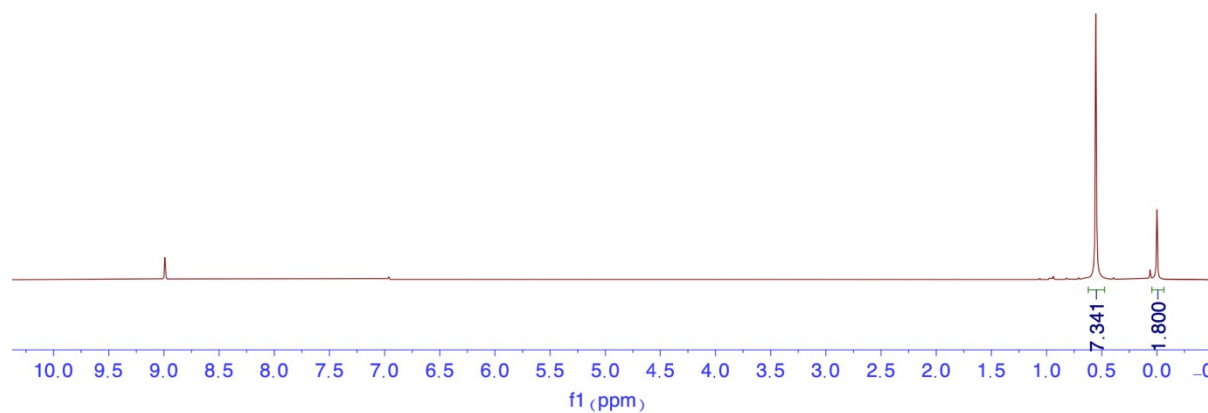

**Figure S55.** <sup>1</sup>H NMR overlay of catalytic hydroboration of *t*Butylaldehyde with HBpin using [Ag(IAd)HMDS] **4** (5 mol%) in C<sub>6</sub>D<sub>6</sub> at 300K

<sup>1</sup>H NMR (400.1 MHz, C<sub>6</sub>D<sub>6</sub>, 300K) δ 3.59 (2H, s), 1.04 (12H, s), 0.82 (9H, s) ppm

<sup>11</sup>B (128.38 MHz, C<sub>6</sub>D<sub>6</sub>, 300K) δ 22.6 ppm (O-Bpin) ppm

## 8a, Acetophenone

t= 24h  
c= 50%

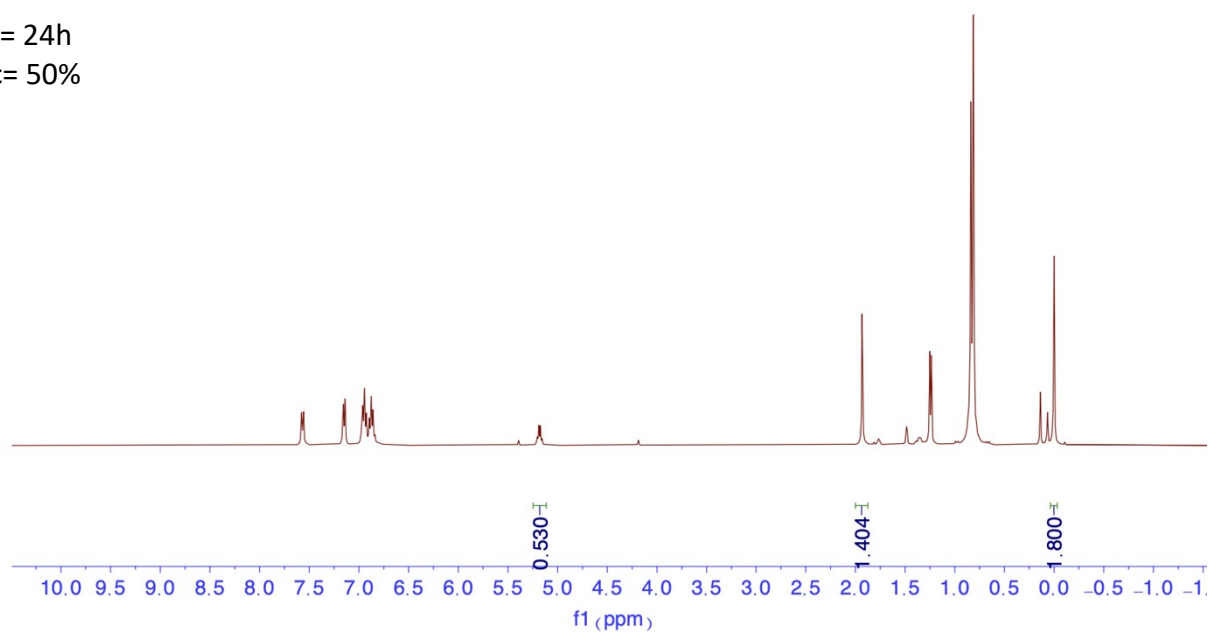

Before addition of **4** and HBpin

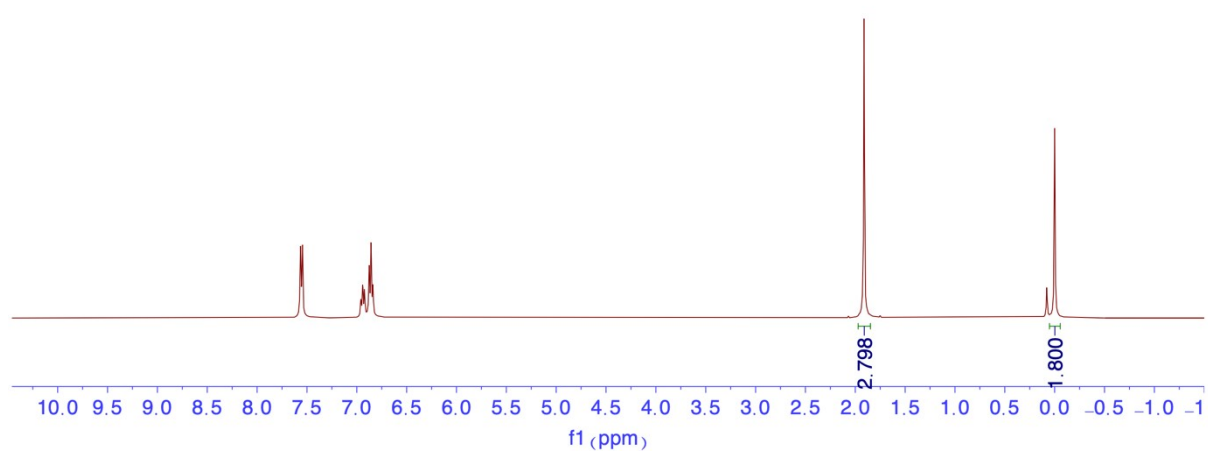

**Figure S56.**  $^1\text{H}$  NMR overlay of catalytic hydroboration of acetophenone with HBpin using [Ag(IAd)HMDS] **4** (5 mol%) in  $\text{C}_6\text{D}_6$  at 300K

$^1\text{H}$  NMR (400.1 MHz,  $\text{C}_6\text{D}_6$ , 300K)  $\delta$  7.56 (1H, d), 7.15 (1H, d), 6.98-6.81 (2H, m), 6.90-6.84 (1H, m), 5.18 (1H, q), 1.21 (3H, s) 0.81 (12H, s) ppm.

$^{11}\text{B}$  (128.38 MHz,  $\text{C}_6\text{D}_6$ , 300K)  $\delta$  22.5 (O-Bpin) ppm.

$^{13}\text{C}$  NMR (100.62 MHz,  $\text{C}_6\text{D}_6$ , 300K)  $\delta$  144.4, 128.5, 127.3, 125.6, 82.5, 72.7, 24.9 and 24.6 ppm.

# 9a, Benzophenone

t= 5h,  
c= 50%

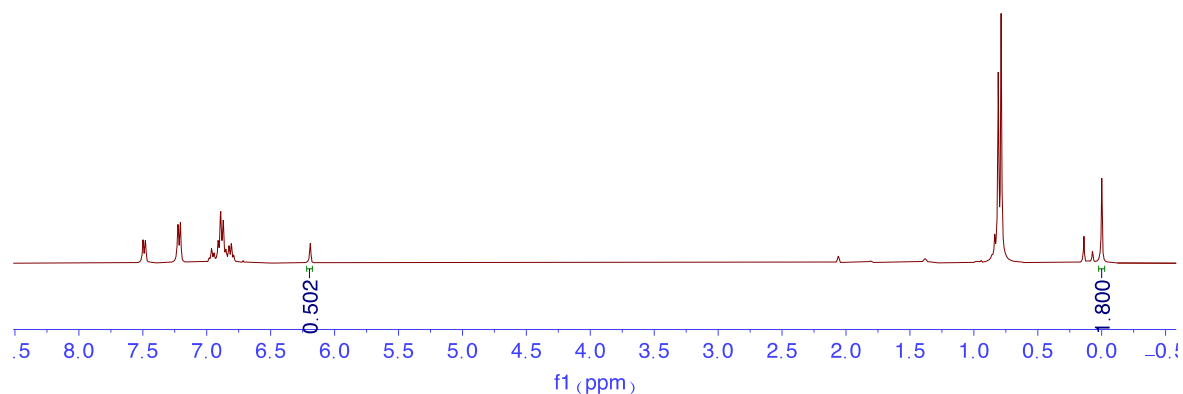

Before addition of **4** and HBpin

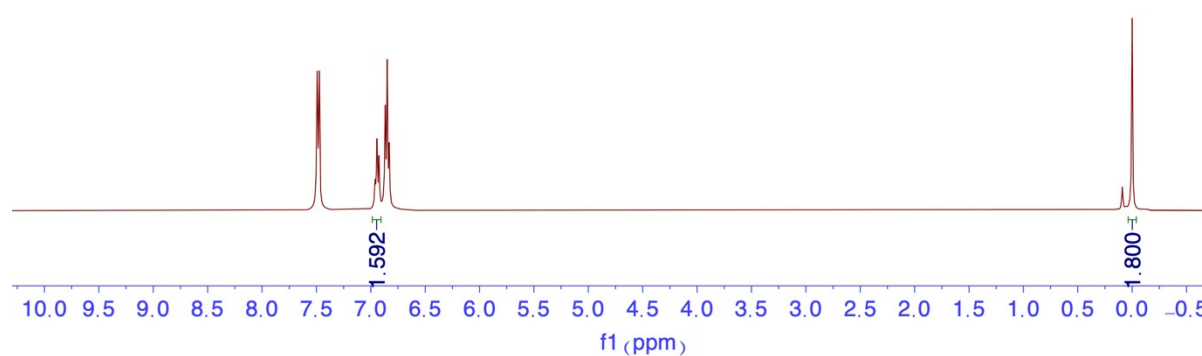

**Figure S57.**  $^1\text{H}$  NMR overlay of catalytic hydroboration of benzophenone with HBpin using [Ag(IAd)HMDS] **4** (5 mol%) in  $\text{C}_6\text{D}_6$  at 300K

$^1\text{H}$  NMR (400.1 MHz,  $\text{C}_6\text{D}_6$ , 300K)  $\delta$  7.49 (1H, d), 7.15 (2H, t), 7.95 (4H, t), 6.89 (4H,t) and 0.98 (12H, s,  $\text{CH}_3$  of Bpin) ppm.

$^{11}\text{B}$  (128.38 MHz,  $\text{C}_6\text{D}_6$ , 300K)  $\delta$  22.8 (O-Bpin) ppm.

# 10a, 2,2,2-Trifluoroacetophenone

t= 0.2h  
c= 90%

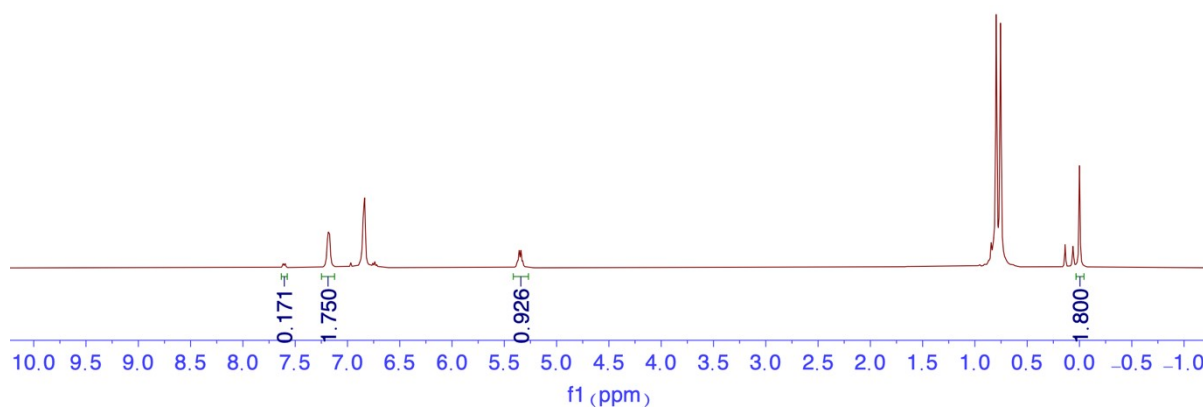

Before addition of **4** and HBpin

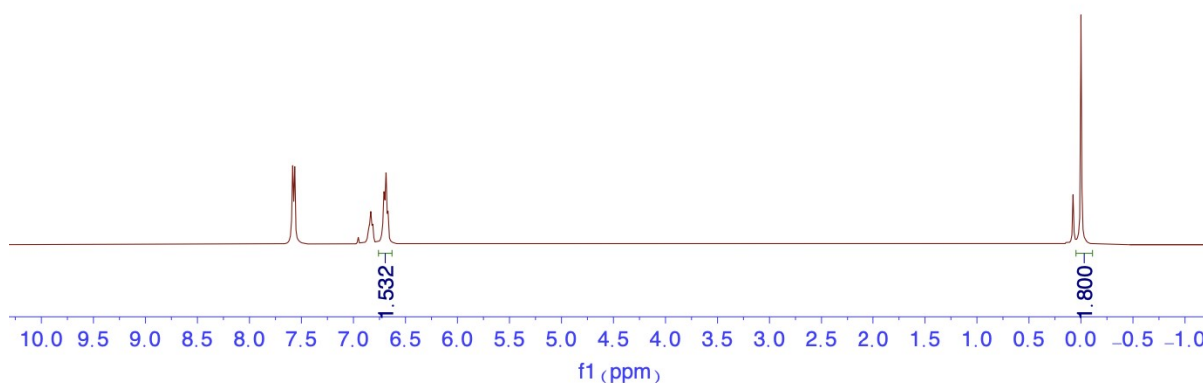

**Figure S58.**  $^1\text{H}$  NMR overlay of catalytic hydroboration of 2,2,2-Trifluoroacetophenone with HBpin using **[Ag(IAd)HMDS] 4** (5 mol%) in  $\text{C}_6\text{D}_6$  at 300K

$^1\text{H}$  NMR (400.1 MHz,  $\text{C}_6\text{D}_6$ , 300K)  $\delta$  7.16 (2H, m), 6.94-6.75 (3H, m), 5.34 (1H, q), 0.78 (12H, d) ppm.

$^{11}\text{B}$  (128.38 MHz,  $\text{C}_6\text{D}_6$ , 300K)  $\delta$  22.9 (HMDS-Bpin) ppm

# 11a, 4-Iodoacetophenone

t= 24h  
c= 80%

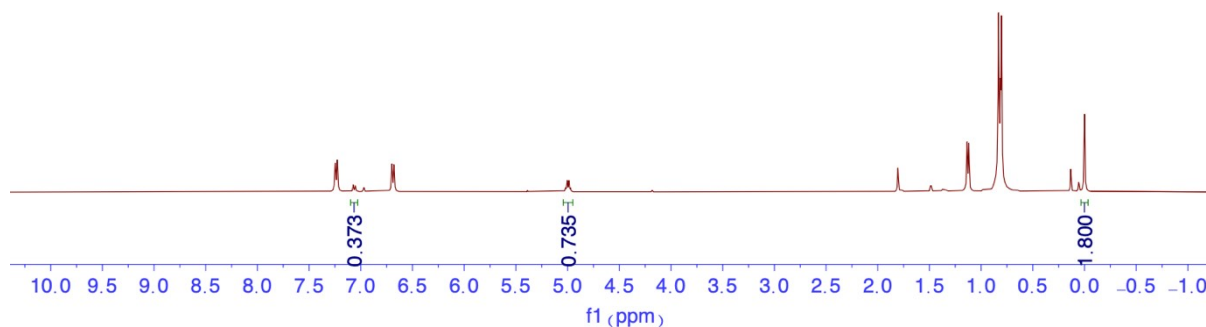

Before addition of **4** and HBpin

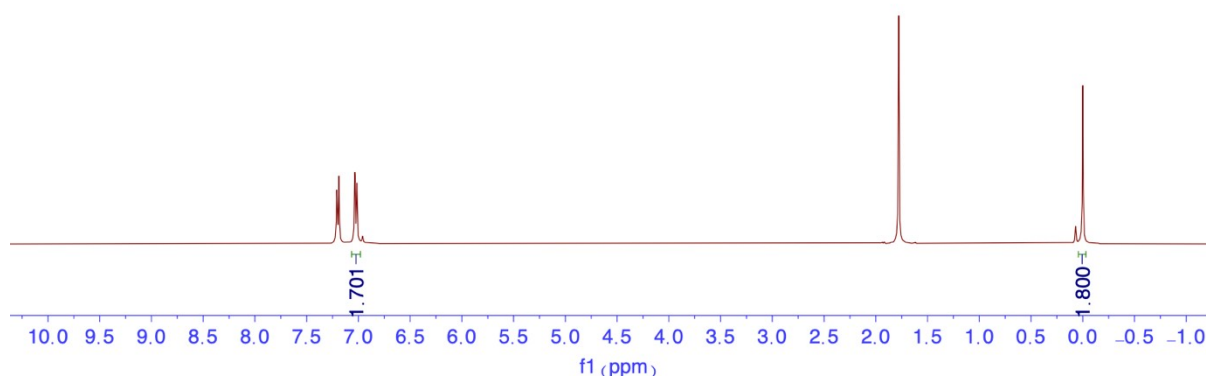

**Figure S59.**  $^1\text{H}$  NMR overlay of catalytic hydroboration of 4-Iodoacetophenone with HBpin using **[Ag(IAd)HMDS] 4** (5 mol%) in  $\text{C}_6\text{D}_6$  at 300K

$^1\text{H}$  NMR (400.1 MHz,  $\text{C}_6\text{D}_6$ , 300K)  $\delta$  7.23 (2H, d), 6.68 (2H, d), 4.99 (1H, q- OCH), 1.12 (3H, d), 0.81 (12H, d,  $\text{CH}_3$  of Bpin) ppm.

$^{11}\text{B}$  (128.38 MHz,  $\text{C}_6\text{D}_6$ , 300K)  $\delta$  22.2 ppm (O-Bpin) ppm.

$^{13}\text{C}$  NMR (100.62 MHz,  $\text{C}_6\text{D}_6$ , 300K)  $\delta$  143.9, 137.6, 127.6, 92.7, 82.5, 72.3, 25.5, 24.6 ppm.

# 12a, 4-NO<sub>2</sub>-Acetophenone

t= 0.7h  
c= 99%

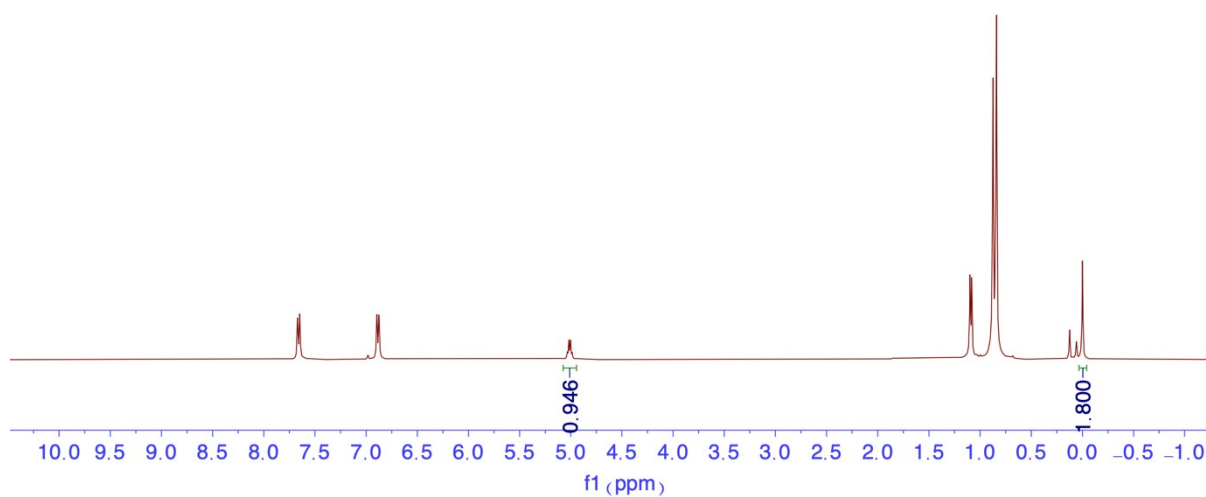

Before addition of **4** and HBpin

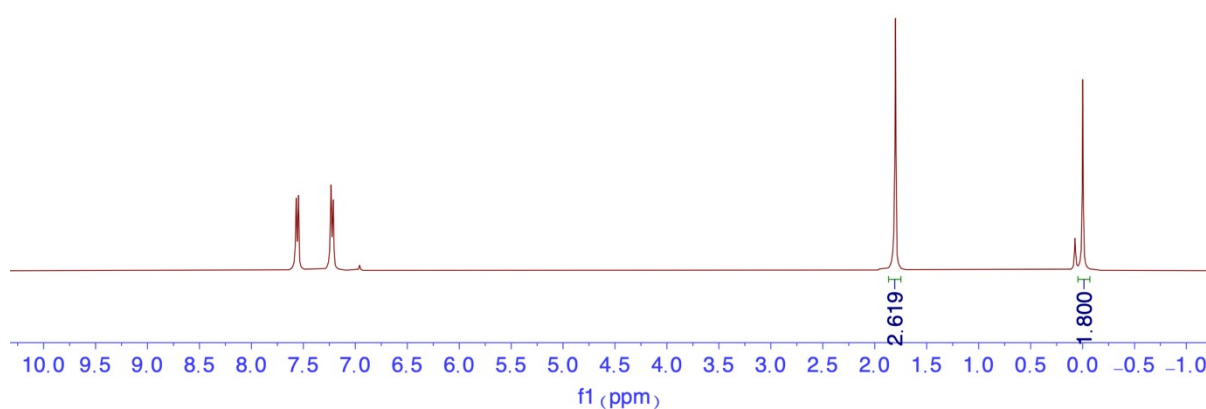

**Figure S60.** <sup>1</sup>H NMR overlay of catalytic hydroboration of 4-NO<sub>2</sub>-Acetophenone with HBpin using [Ag(IAd)HMDS] **4** (5 mol%) in C<sub>6</sub>D<sub>6</sub> at 300K

<sup>1</sup>H NMR (400.1 MHz, C<sub>6</sub>D<sub>6</sub>, 300K) δ 7.66 (2H, d), 6.88 (2H, d), 5.00 (1H, s, OCH), 1.07 (3H, s), and 0.85 (12H, s, CH<sub>3</sub> of Bpin) ppm.

<sup>11</sup>B (128.38 MHz, C<sub>6</sub>D<sub>6</sub>, 300K) δ 22.9 (O-Bpin) ppm.

# 13a, 9-Fluorenone

t= 3.5h  
c= 70%

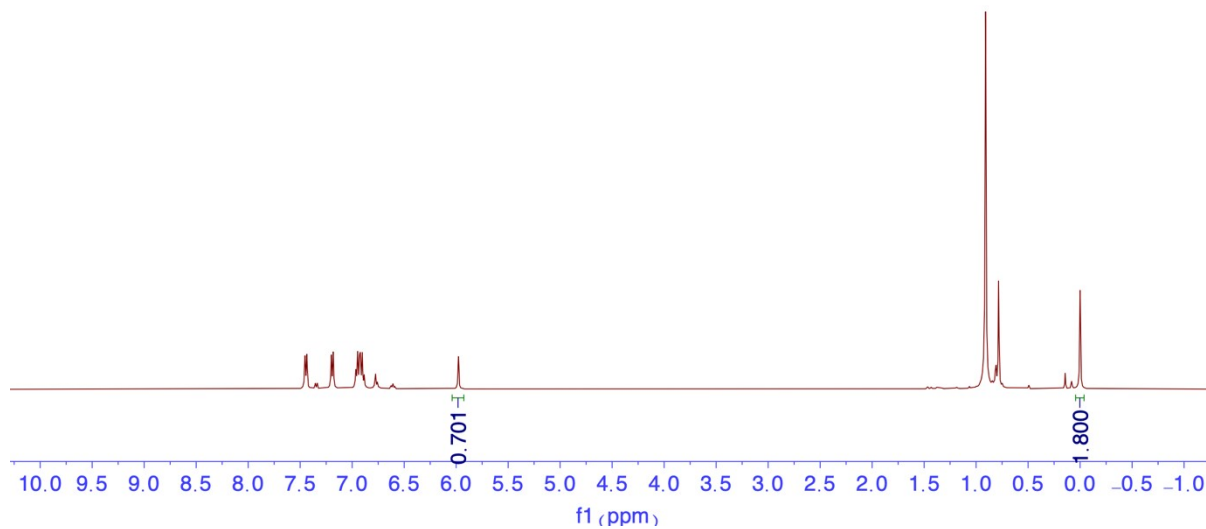

Before addition of **4** and HBpin

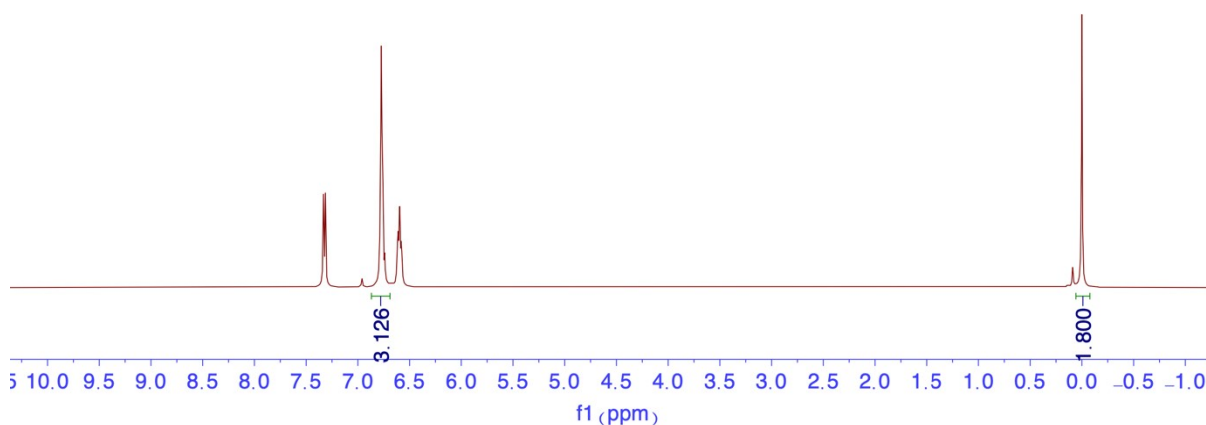

**Figure S61.** <sup>1</sup>H NMR overlay of catalytic hydroboration of 9-Fluorenone with HBpin using [Ag(IAd)HMDS] **4** (5 mol%) in C<sub>6</sub>D<sub>6</sub> at 300K

<sup>1</sup>H NMR (400.1 MHz, C<sub>6</sub>D<sub>6</sub>, 300K) δ 7.45 (2H, d), 7.19 (2H, d), 6.92 (4H, m), 5.97 (1H, s OCH), 0.90 (12H, s, CH<sub>3</sub> of Bpin) ppm.

<sup>11</sup>B (128.38 MHz, C<sub>6</sub>D<sub>6</sub>, 300K) δ 22.9 (O-Bpin) ppm.



# 14a, Cyclopentanone

t= 9h  
c= 60%

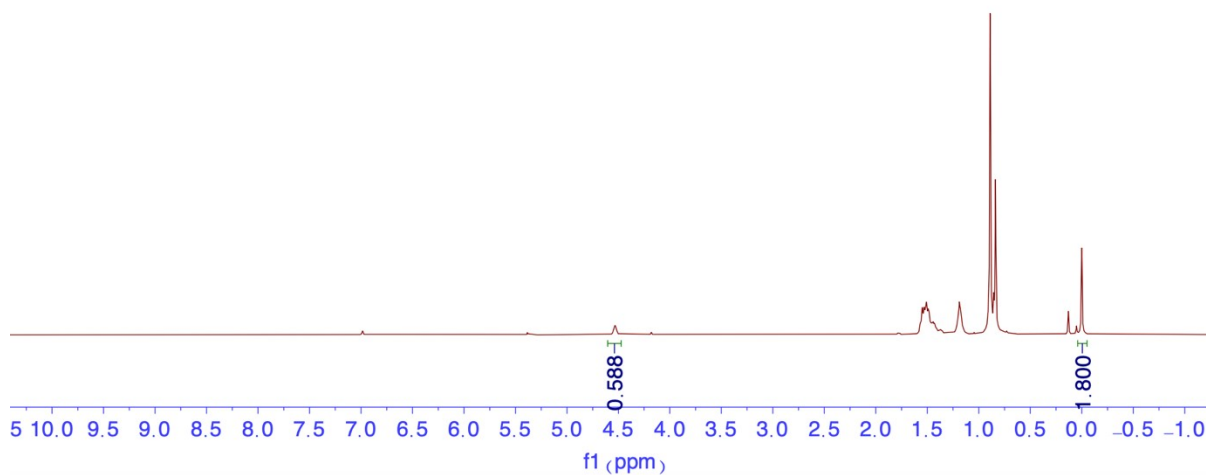

Before addition of **4** and HBpin

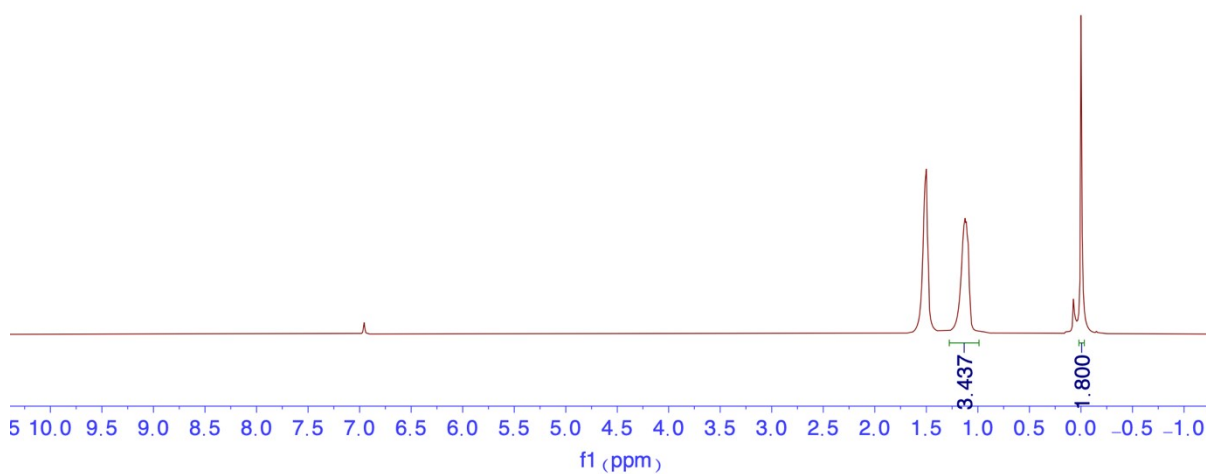

**Figure S62.** <sup>1</sup>H NMR overlay of catalytic hydroboration of cyclopentanone with HBpin using [Ag(IAd)HMDS] **4** (5 mol%) in C<sub>6</sub>D<sub>6</sub> at 300K

<sup>1</sup>H NMR (400.1 MHz, C<sub>6</sub>D<sub>6</sub>, 300K) δ 4.69 (1H, m), 1.74-1.51 (6H, m), 1.39-1.33 (2H, m), 0. (12H, s, CH<sub>3</sub> of Bpin)

<sup>11</sup>B (128.38 MHz, C<sub>6</sub>D<sub>6</sub>, 300K) δ 22.5 ppm (O-Bpin)

# Catalytic hydrosilylation using 4

Table S5: Carbonyl hydrosilylation using Ph<sub>2</sub>SiH<sub>2</sub>, catalysed by [Ag(IAd)HMDS]

| Table S5. Hydrosilylation of carbonyls catalysed by 4 |         |                               |       |         |                              |
|-------------------------------------------------------|---------|-------------------------------|-------|---------|------------------------------|
|                                                       |         |                               |       |         |                              |
| Entry                                                 | Product | 4                             | Entry | Product | 4                            |
| 1b                                                    |         | 1h<br>99%                     | 8b    |         | 24h<br><5%                   |
| 2b                                                    |         | 0.5h<br>99% <sup>[b,c]</sup>  | 9b    |         | 24h<br><5%                   |
| 3b                                                    |         | 0.25h<br>99% <sup>[b,c]</sup> | 10b   |         | 0.5h<br>99% <sup>[b,c]</sup> |
| 4b                                                    |         | 0.5h<br>99% <sup>[b,c]</sup>  | 11b   |         | 18h<br><5%                   |
| 5b                                                    |         | 3.5h<br>74%                   | 12b   |         | 1.5h<br>99% <sup>[b,c]</sup> |
| 6b                                                    |         | 24h<br>99% <sup>[b,c]</sup>   | 13b   |         | 0.5h<br>80%                  |
| 7b                                                    |         | 8.5h<br>40%                   | 14b   |         | 24h<br><5%                   |

% values indicate % conversion of starting material [a] Reaction conditions: substrate (1 mmol), Ph<sub>2</sub>SiH<sub>2</sub> or HBpin (1.5 mmol), 5 mol% [Ag(IAd)HMDS] (4) with 10 mol% internal standard hexamethylcyclotrisiloxane in C<sub>6</sub>D<sub>6</sub> at room temperature. [b] conversion of substrate. [c] yield of corresponding alcohol product after reaction quench in C<sub>6</sub>D<sub>6</sub>.

# 1b, Benzaldehyde

t= 1h  
c= 99%

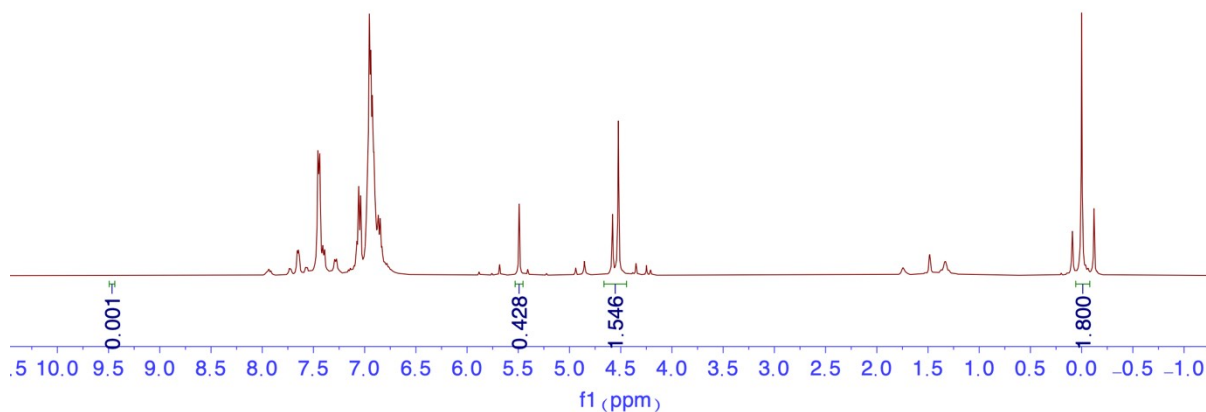

Before addition of **4** and Ph<sub>2</sub>SiH<sub>2</sub>

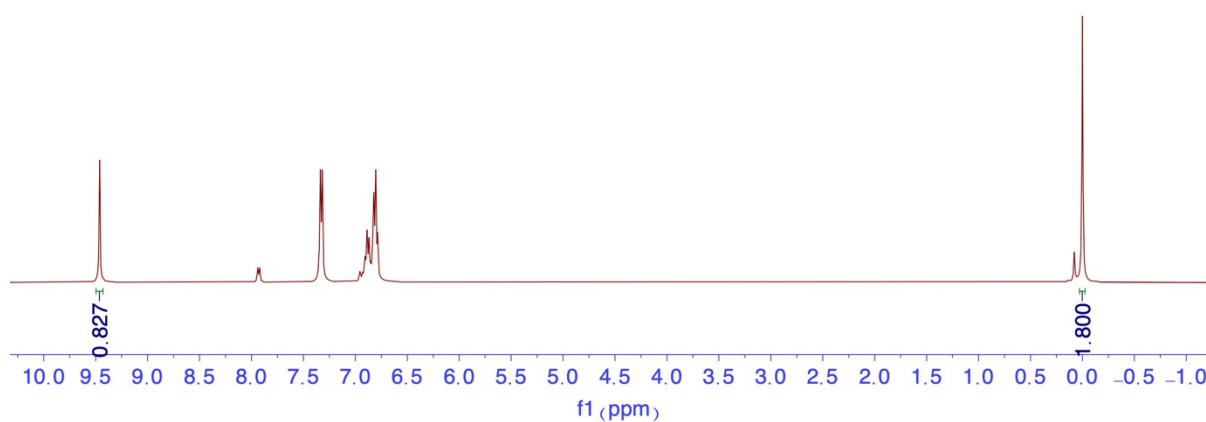

**Figure S63.** <sup>1</sup>H NMR overlay of catalytic hydrosilylation of benzaldehyde with Ph<sub>2</sub>SiH<sub>2</sub> using [Ag(IAd)HMDS] **4** (5 mol%) in C<sub>6</sub>D<sub>6</sub> at 300K

<sup>1</sup>H NMR (400.1 MHz, C<sub>6</sub>D<sub>6</sub>, 300K) δ 7.63 – 7.28 (4H, m), 7.05 (2H, m), 6.99 – 6.92 (9H, m), 5.49 (1H, s, SiH) and 4.53 (2H, s) ppm.

## 2b, 4-Br-Benzaldehyde

t= 0.5h

c= 99%<sup>[b]</sup> 65<sup>[c]</sup>

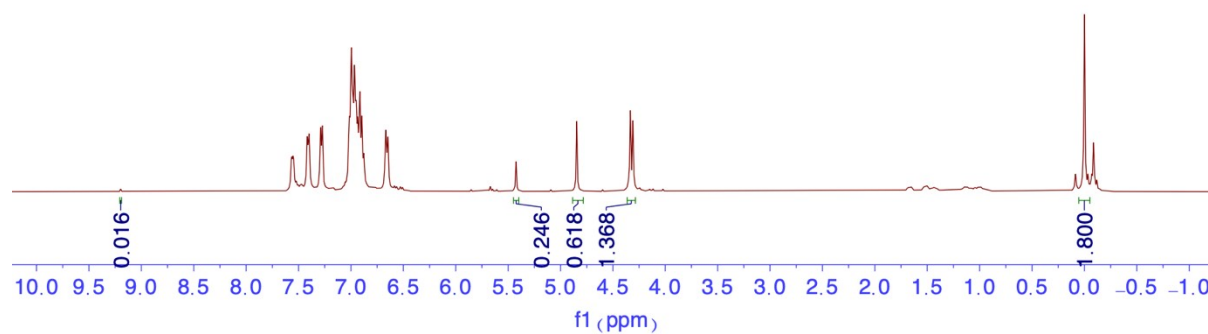

Before addition of **4** and Ph<sub>2</sub>SiH<sub>2</sub>

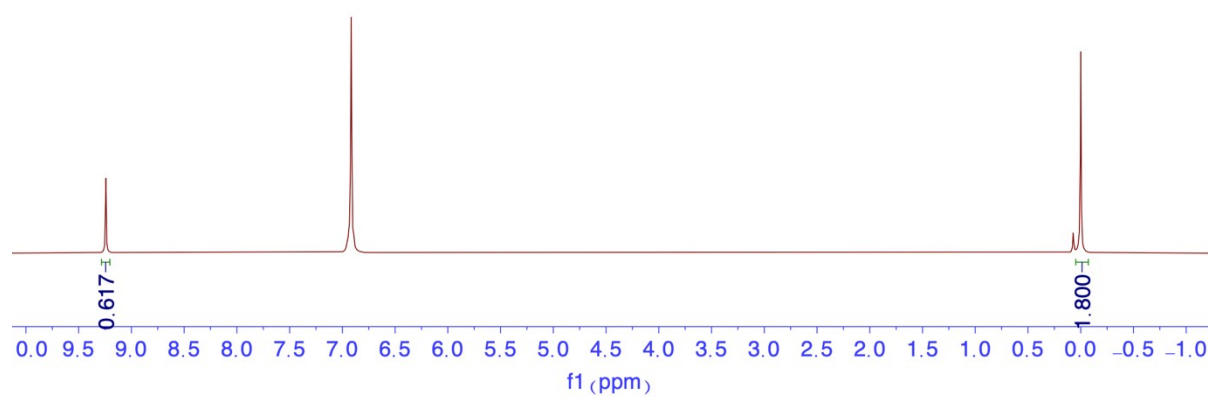

**Figure S64.** <sup>1</sup>H NMR overlay of catalytic hydrosilylation of 4-Br-Benzaldehyde with Ph<sub>2</sub>SiH<sub>2</sub> using [Ag(IAd)HMDS] **4** (5 mol%) in C<sub>6</sub>D<sub>6</sub> at 300K

Mixture of products - reaction quenched with TBAF

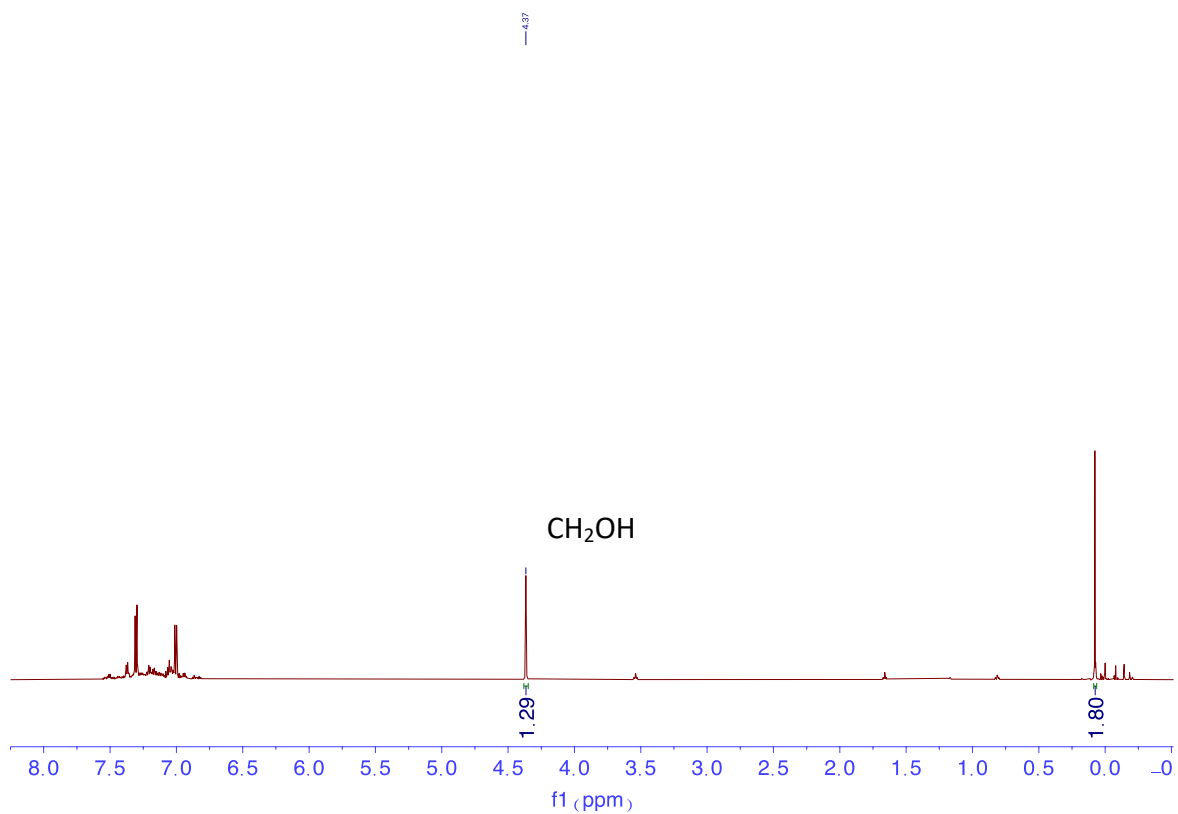

**Figure S65.** <sup>1</sup>H NMR of organic product following a quench of the catalytic hydrosilylation reaction of 4-Br-benzaldehyde with Ph<sub>2</sub>SiH<sub>2</sub> using **4** (5 mol%) in CDCl<sub>3</sub> at 300K.

## 3b, 4-CN-Benzaldehyde

t= 0.25h

c= 99%<sup>[b]</sup> 93<sup>[c]</sup>

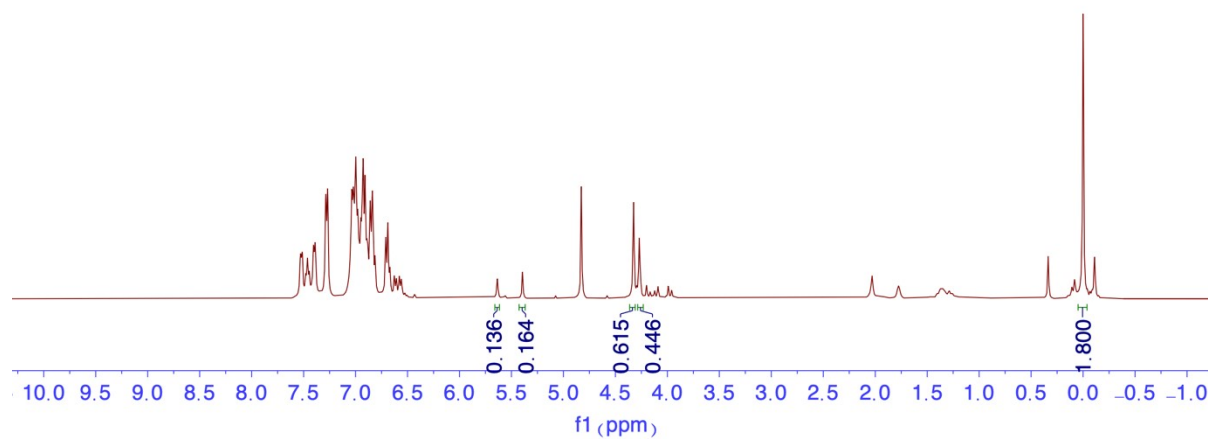

Before addition of **4** and Ph<sub>2</sub>SiH<sub>2</sub>

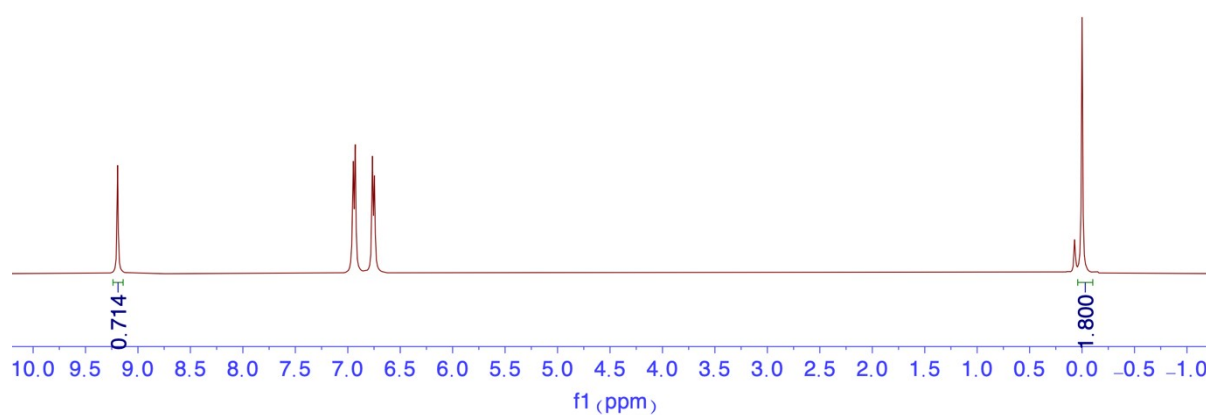

**Figure S66.** <sup>1</sup>H NMR overlay of catalytic hydrosilylation of 4-CN-Benzaldehyde with Ph<sub>2</sub>SiH<sub>2</sub> using [Ag(IAd)HMDS] **4** (5 mol%) in C<sub>6</sub>D<sub>6</sub> at 300K

Mixture of products - reaction quenched with TBAF

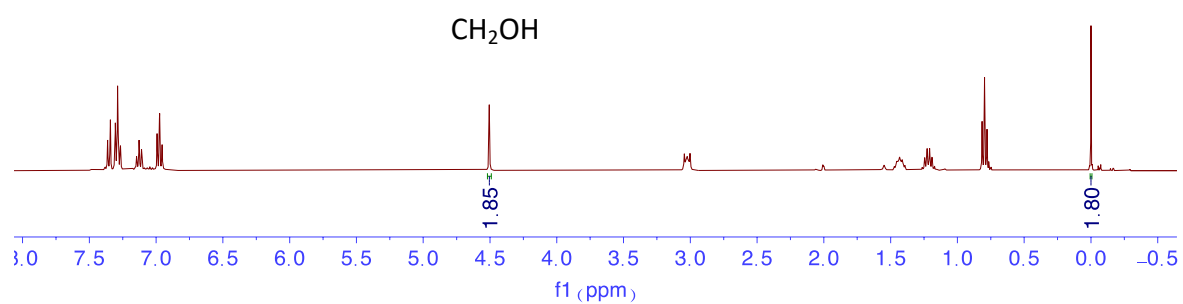

**Figure S67.** <sup>1</sup>H NMR of organic product following a quench of the catalytic hydrosilylation reaction of 4-CN-benzaldehyde with Ph<sub>2</sub>SiH<sub>2</sub> using **4** (5 mol%) in CDCl<sub>3</sub> at 300K.

## 4b, 2-CF<sub>3</sub>-Benzaldehyde

t= 0.5h

c= 99%<sup>[b]</sup> 87<sup>[c]</sup>

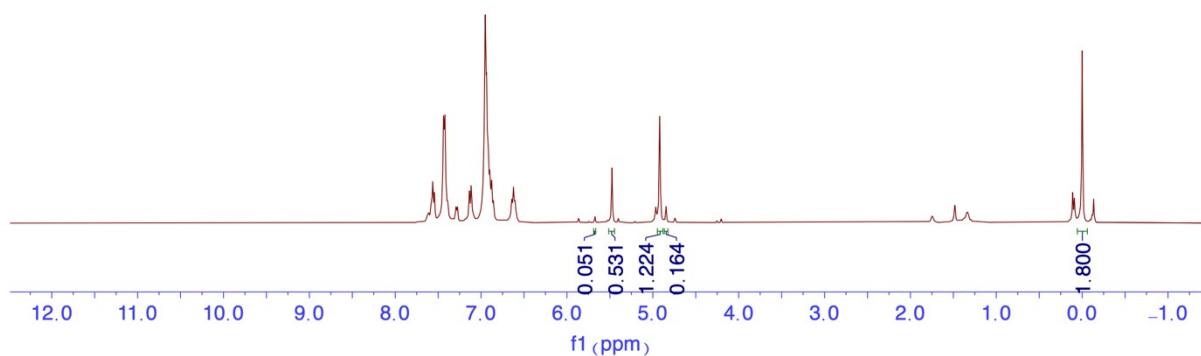

Before addition of **4** and Ph<sub>2</sub>SiH<sub>2</sub>

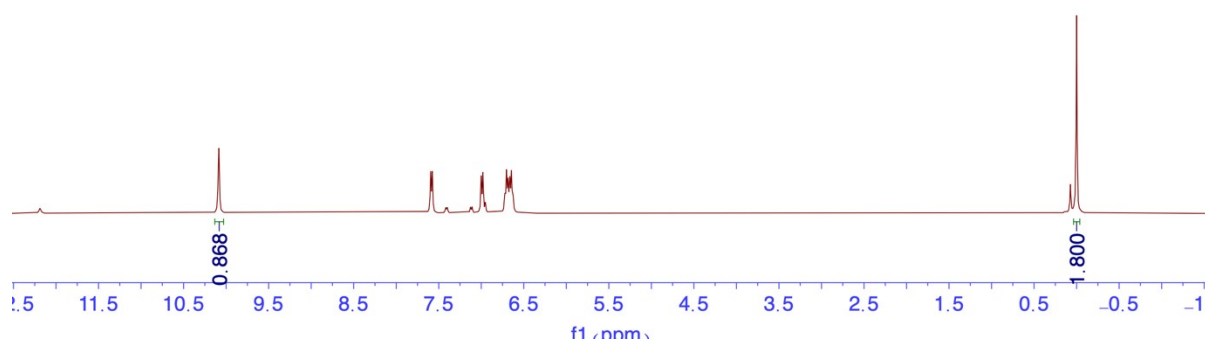

**Figure S68.** <sup>1</sup>H NMR overlay of catalytic hydrosilylation of 2-CF<sub>3</sub>-Benzaldehyde with Ph<sub>2</sub>SiH<sub>2</sub> using [Ag(IAd)HMDS] **4** (5 mol%) in C<sub>6</sub>D<sub>6</sub> at 300K

Mixture of products - reaction quenched with TBAF



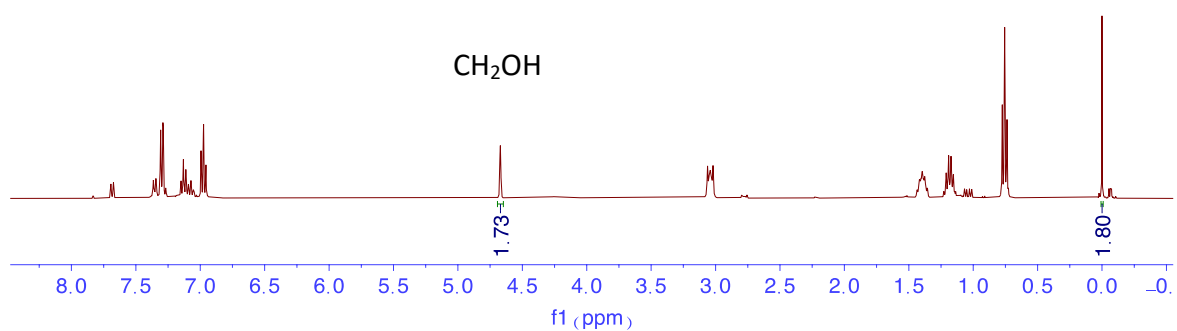

**Figure S69.** <sup>1</sup>H NMR of organic product following a quench of the catalytic hydrosilylation reaction of 4-CF<sub>3</sub>-benzaldehyde with Ph<sub>2</sub>SiH<sub>2</sub> using **4** (5 mol%) in CDCl<sub>3</sub> at 300K.

## 5b, 3-OMe-Benzaldehyde

t= 3.5h

c= 74%

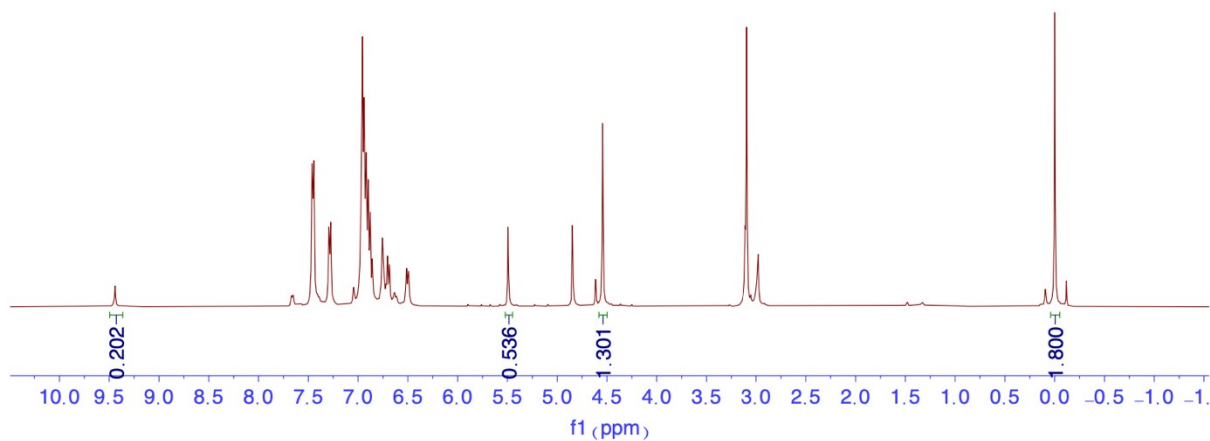

Before addition of **4** and Ph<sub>2</sub>SiH<sub>2</sub>

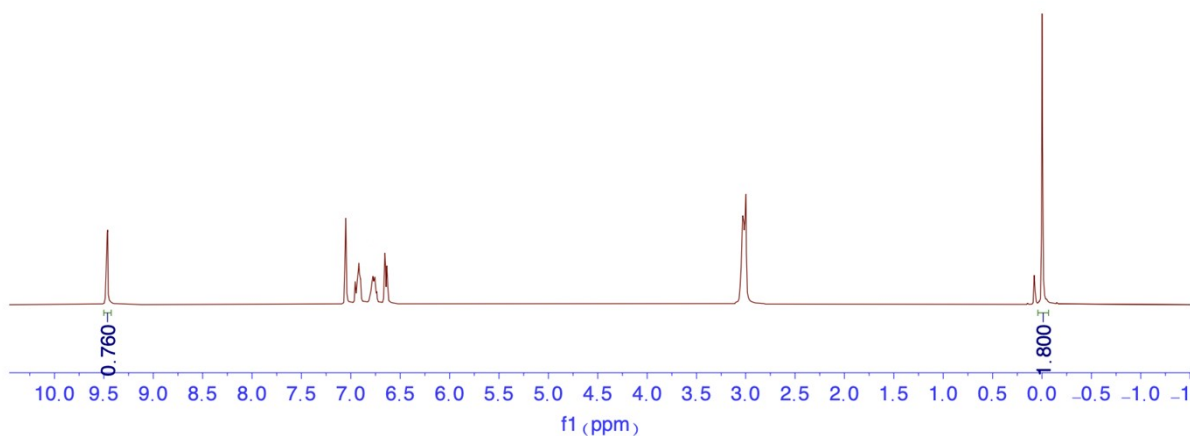

**Figure S70.** <sup>1</sup>H NMR overlay of catalytic hydrosilylation of 3-OMe-Benzaldehyde with Ph<sub>2</sub>SiH<sub>2</sub> using [Ag(IAd)HMDS] **4** (5 mol%) in C<sub>6</sub>D<sub>6</sub> at 300K

<sup>1</sup>H NMR (400.1 MHz, C<sub>6</sub>D<sub>6</sub>, 300K) δ 7.49-7.24 (4H, m), 7.02-6.83 (7H, m), 6.75 (1H, br s), 5.47 (1H, s, Si-H), 4.54 (2H, s, CH<sub>2</sub>), 3.08 (3H, s, OCH<sub>3</sub>),

<sup>13</sup>C NMR (100.62 MHz, C<sub>6</sub>D<sub>6</sub>, 300K) δ 160.2, 142.3, 136.0, 135.1, 130.6, 129.6, 128.4, 119.1, 113.3, 66.6, 54.5

## 6b, Mesitaldehyde

t= 24h

c= 99%<sup>[b]</sup> 81%<sup>[c]</sup>

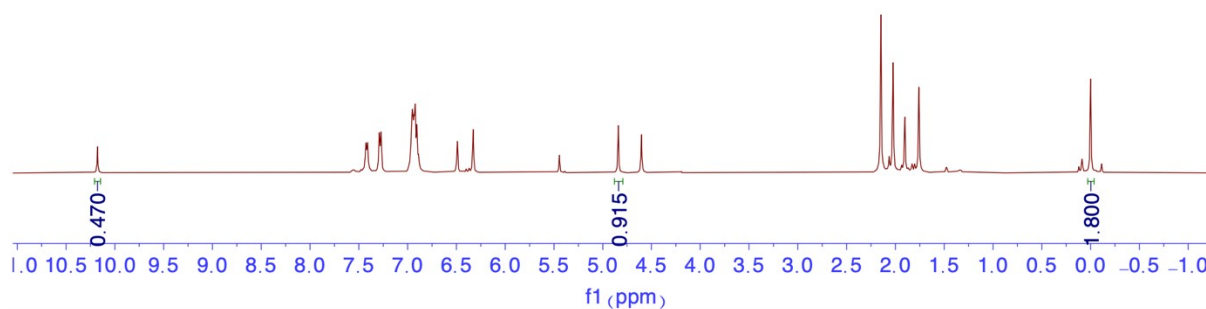

Before addition of **4** and Ph<sub>2</sub>SiH<sub>2</sub>

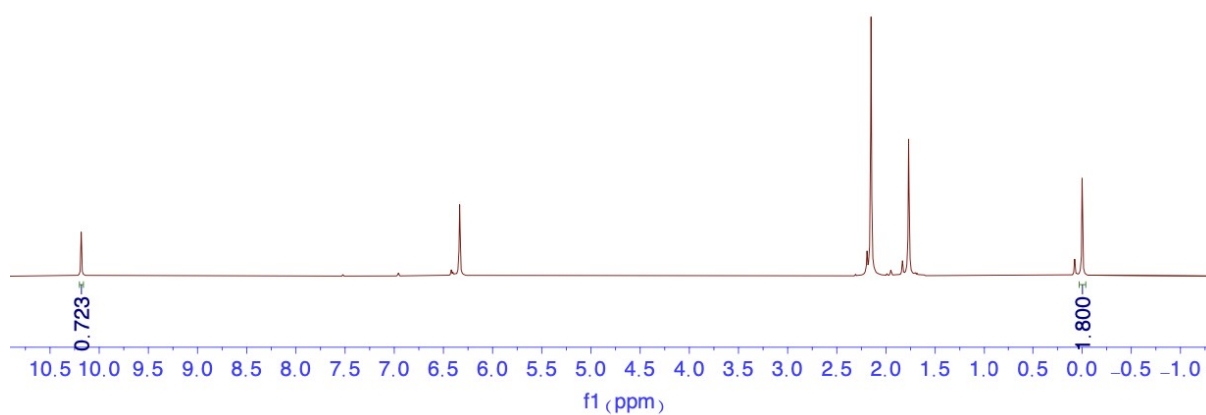

**Figure S71.** <sup>1</sup>H NMR overlay of catalytic hydrosilylation of mesitaldehyde with Ph<sub>2</sub>SiH<sub>2</sub> using [Ag(IAd)HMDS] **4** (5 mol%) in C<sub>6</sub>D<sub>6</sub> at 300K

Mixture of products - reaction quenched with TBAF

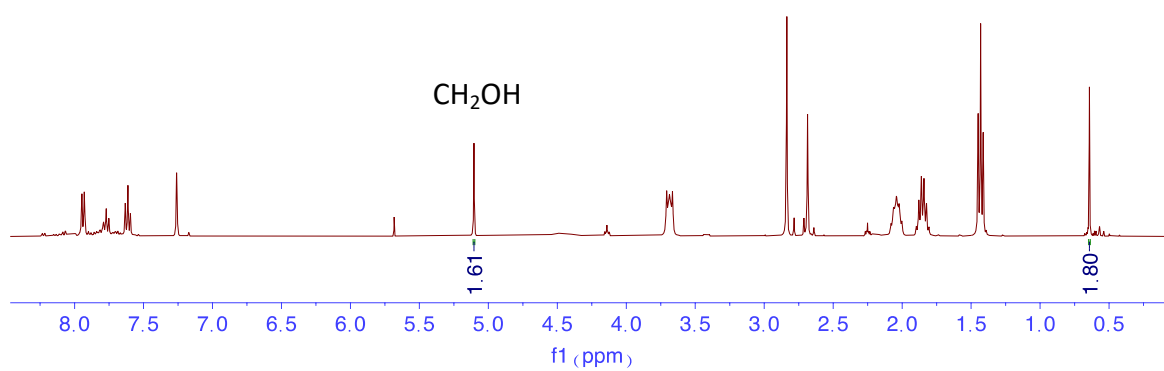

**Figure S72.** <sup>1</sup>H NMR of organic product following a quench of the catalytic hydrosilylation reaction of mesitaldehyde with Ph<sub>2</sub>SiH<sub>2</sub> using **4** (5 mol%) in CDCl<sub>3</sub> at 300K.

## 7b, *t*Butylaldehyde

t= 8.5h  
c= 40%,

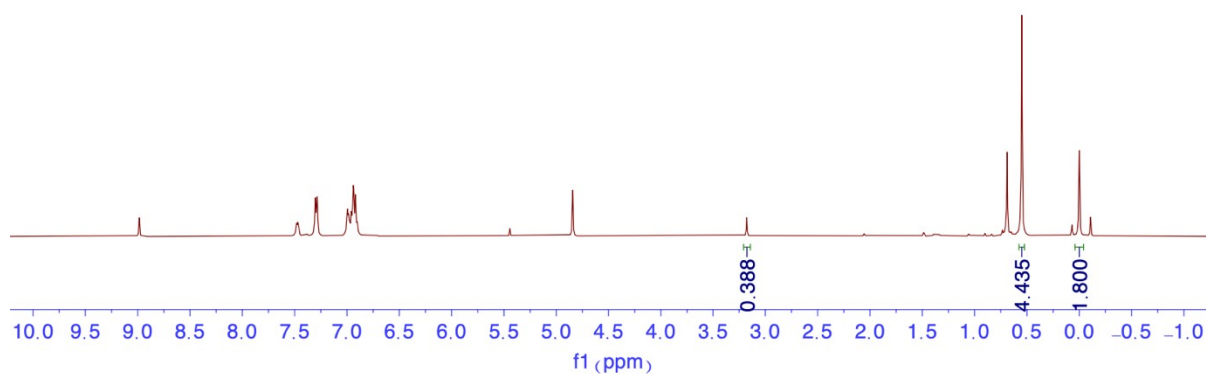

Before addition of **4** and Ph<sub>2</sub>SiH<sub>2</sub>

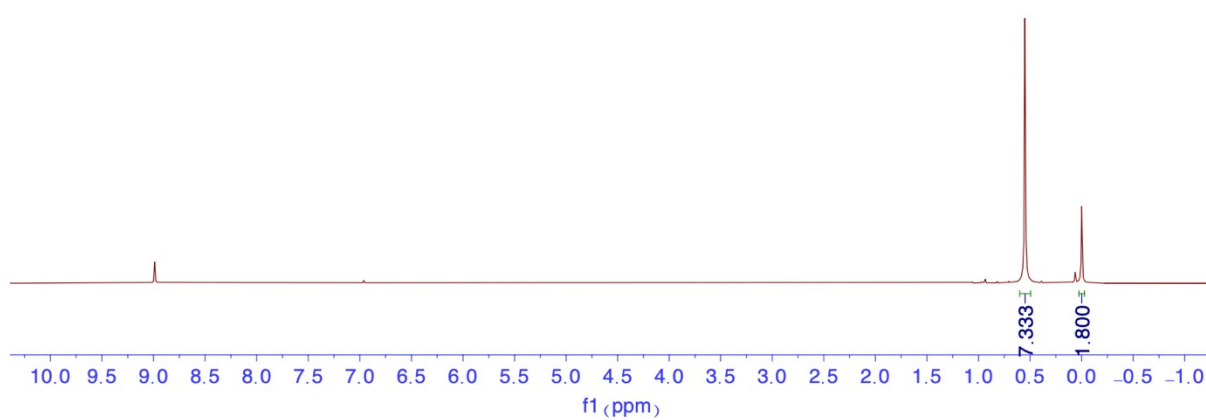

**Figure S73.** <sup>1</sup>H NMR overlay of catalytic hydrosilylation of *t*Butylaldehyde with Ph<sub>2</sub>SiH<sub>2</sub> using [Ag(IAd)HMDS] **4** (5 mol%) in C<sub>6</sub>D<sub>6</sub> at 300K

<sup>1</sup>H NMR (400.1 MHz, C<sub>6</sub>D<sub>6</sub>, 300K) δ 7.51-7.21 (4H, m), 7.02-6.81 (6H, m), 4.84 (1H, s, SiH), 3.16 (1H,s), 0.63 (9H, s)

## 8b, Acetophenone

t= 24h,  
c= <5%

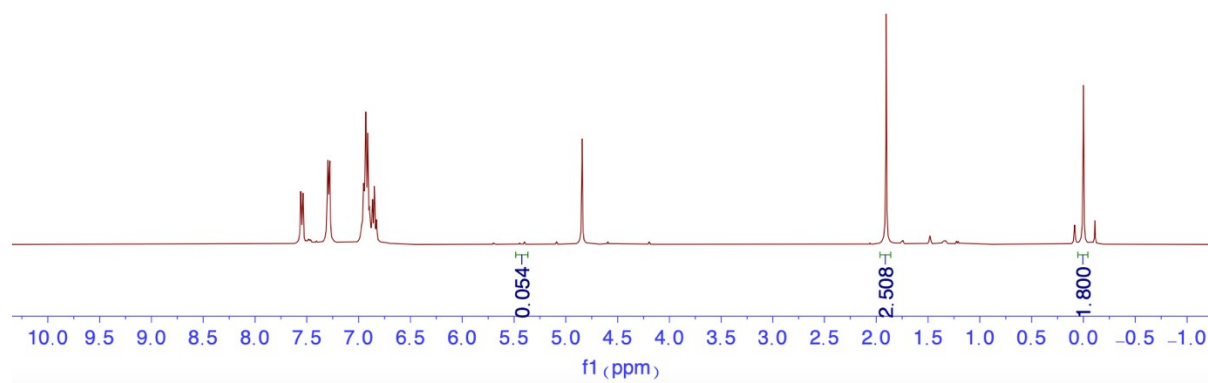

Before addition of **4** and Ph<sub>2</sub>SiH<sub>2</sub>

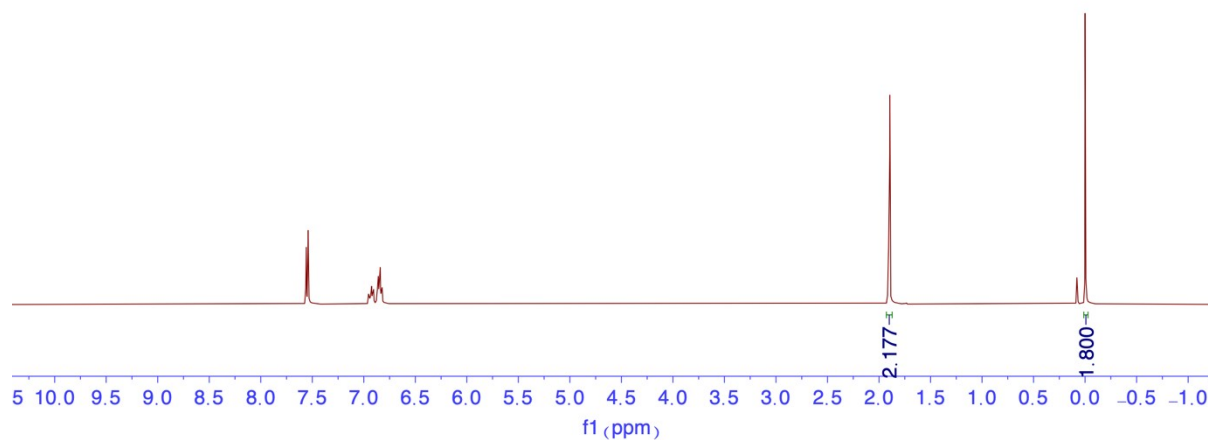

**Figure S74.** <sup>1</sup>H NMR overlay of catalytic hydrosilylation of acetophenone with Ph<sub>2</sub>SiH<sub>2</sub> using [Ag(IAd)HMDS] **4** (5 mol%) in C<sub>6</sub>D<sub>6</sub> at 300K

## 9b, Benzophenone

t= 24h

c=<5%

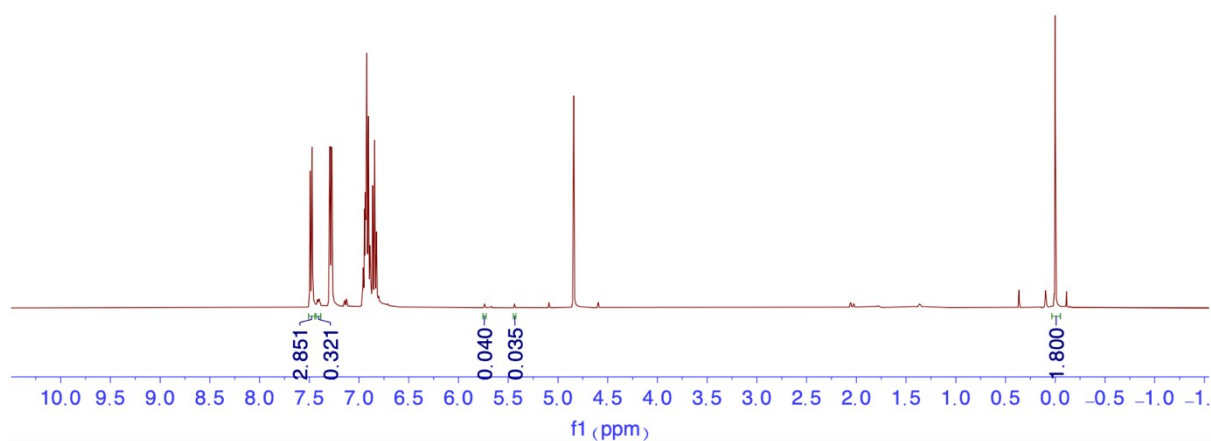

Before addition of **4** and  $\text{Ph}_2\text{SiH}_2$

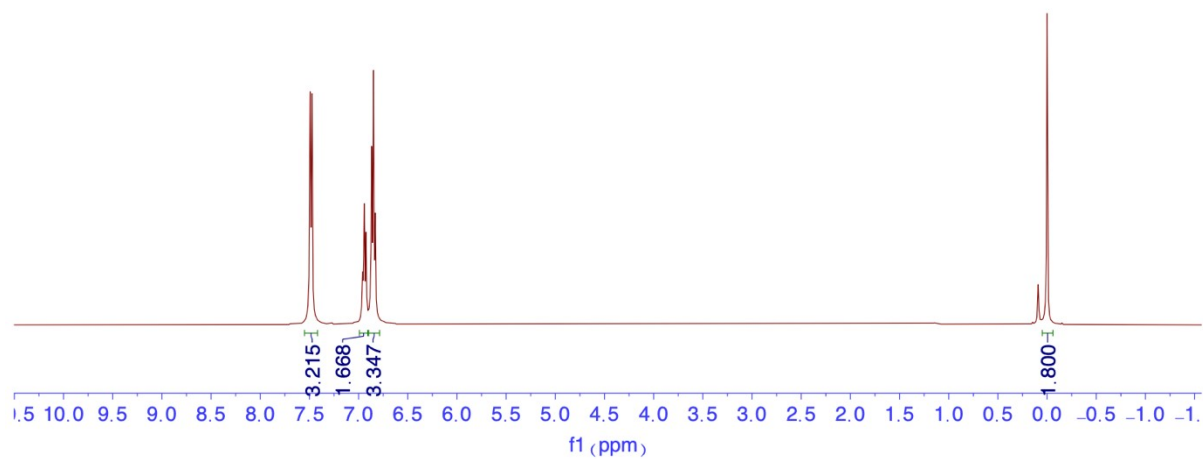

**Figure S75.**  $^1\text{H}$  NMR overlay of catalytic hydrosilylation of benzophenone with  $\text{Ph}_2\text{SiH}_2$  using **[Ag(IAd)HMDS] 4** (5 mol%) in  $\text{C}_6\text{D}_6$  at 300K

# 10b, 2,2,2-Trifluoroacetophenone

t= 0.5 h

c= 99%<sup>[b]</sup> 69%<sup>[c]</sup>

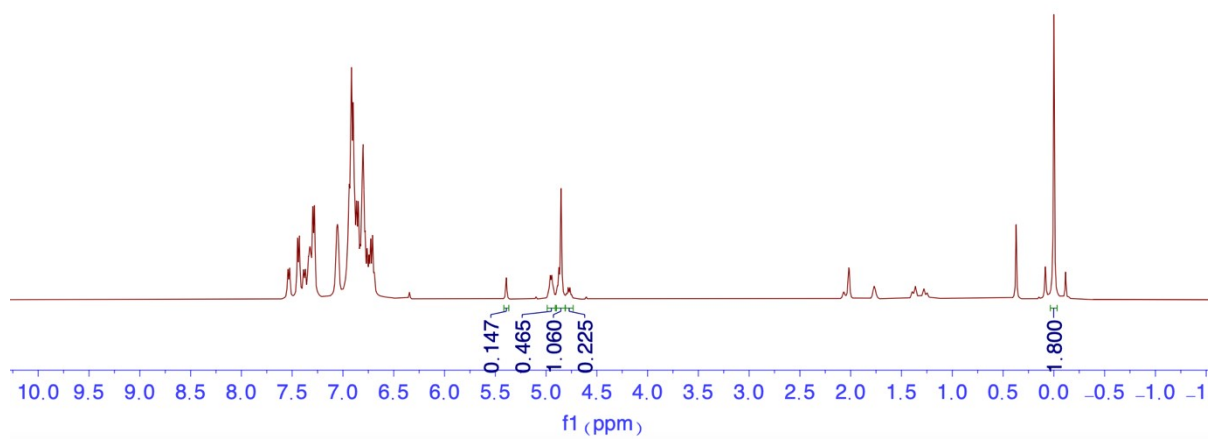

Before addition of **4** and Ph<sub>2</sub>SiH<sub>2</sub>

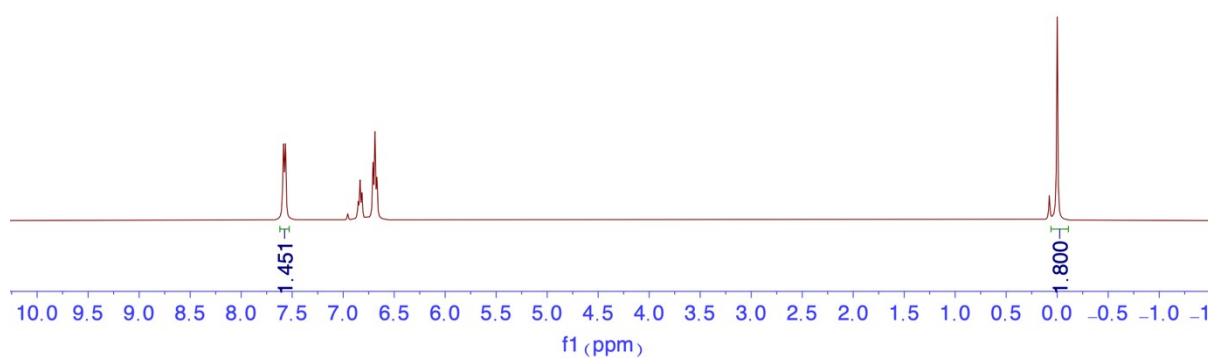

**Figure S76.** <sup>1</sup>H NMR overlay of catalytic hydrosilylation of 2,2,2-Trifluoroacetophenone with Ph<sub>2</sub>SiH<sub>2</sub> using [Ag(IAd)HMDS] **4** (5 mol%) in C<sub>6</sub>D<sub>6</sub> at 300K

Mixture of products - reaction quenched with TBAF



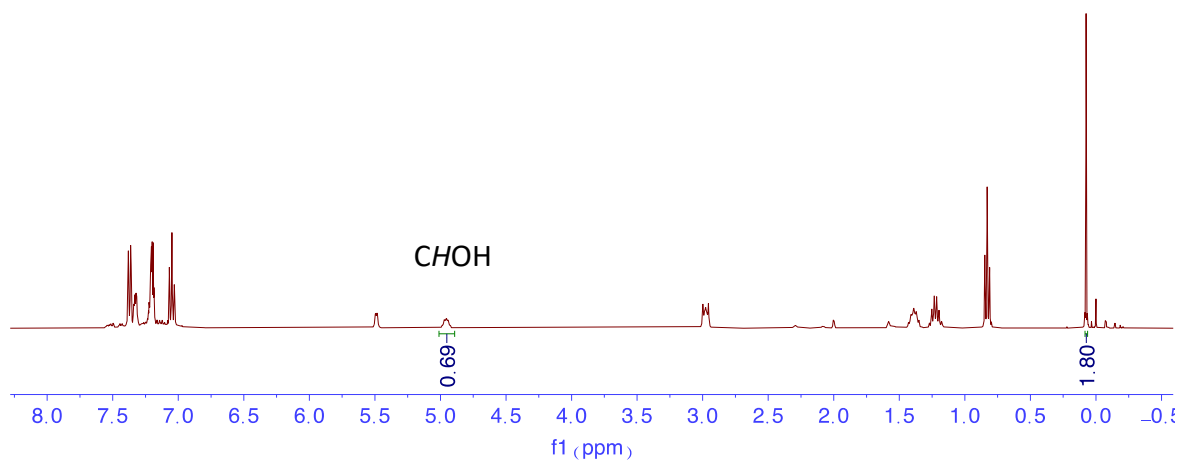

**Figure S77.**  $^1\text{H}$  NMR of organic product following a quench of the catalytic hydrosilylation reaction of 2,2,2-trifluoroacetophenone with  $\text{Ph}_2\text{SiH}_2$  using **4** (5 mol%) in  $\text{CDCl}_3$  at 300K.

# 11b, 4-Iodoacetophenone

t= 18h  
c=<5%

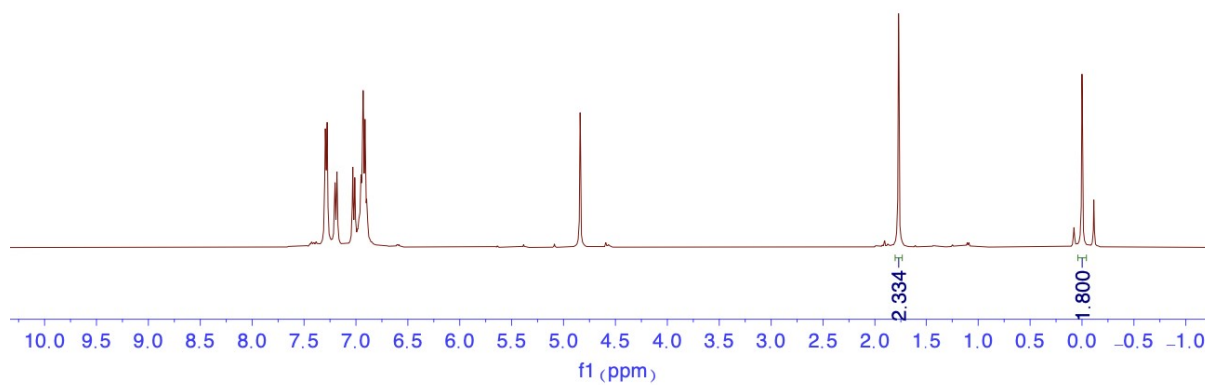

Before addition of **4** and Ph<sub>2</sub>SiH<sub>2</sub>

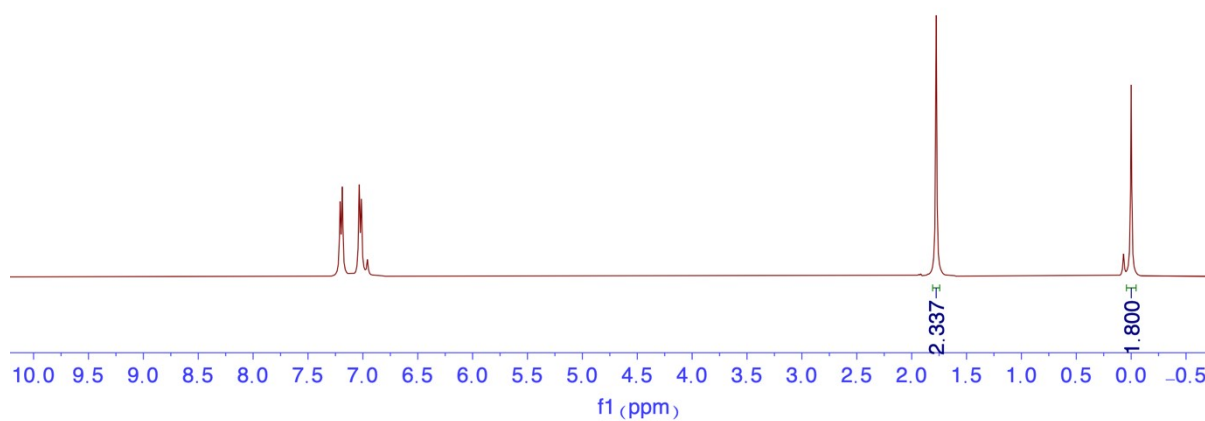

**Figure S78.** <sup>1</sup>H NMR overlay of catalytic hydrosilylation of 4-Iodoacetophenone with Ph<sub>2</sub>SiH<sub>2</sub> using [Ag(IAd)HMDS] **4** (5 mol%) in C<sub>6</sub>D<sub>6</sub> at 300K

# 12b, 4-NO<sub>2</sub>-Acetophenone

t= 1.5h

c= 99%<sup>[b]</sup> 48%<sup>[c]</sup>

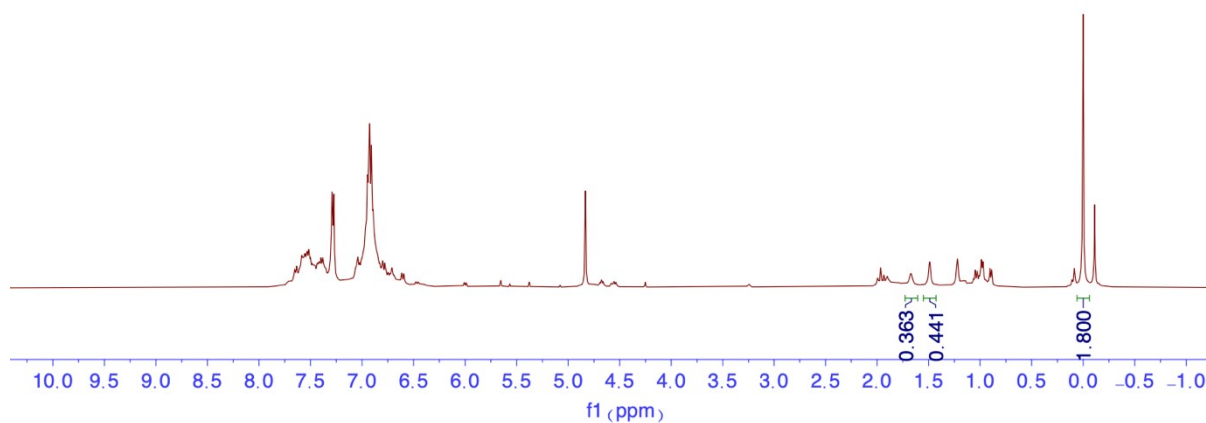

Before addition of **4** and Ph<sub>2</sub>SiH<sub>2</sub>

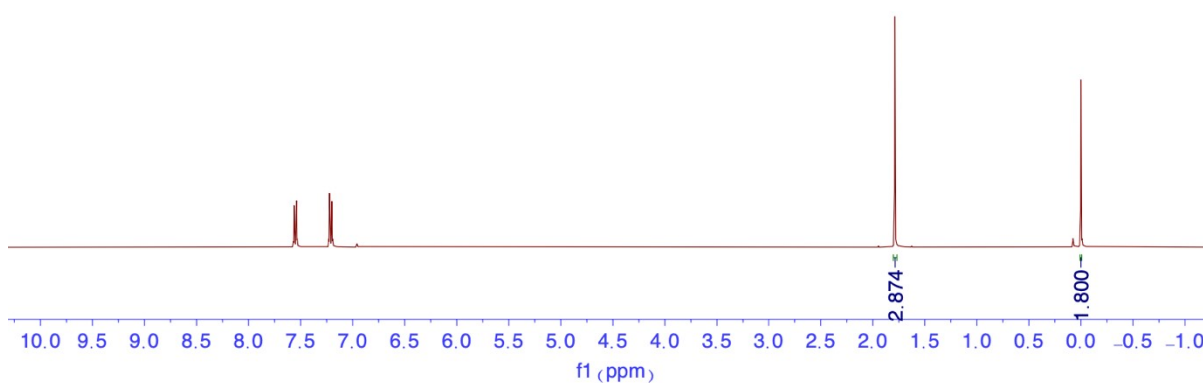

**Figure S79.** <sup>1</sup>H NMR overlay of catalytic hydrosilylation of 4-NO<sub>2</sub>-Acetophenone with Ph<sub>2</sub>SiH<sub>2</sub> using [Ag(IAd)HMDS] **4** (5 mol%) in C<sub>6</sub>D<sub>6</sub> at 300K

Mixture of products - reaction quenched with TBAF

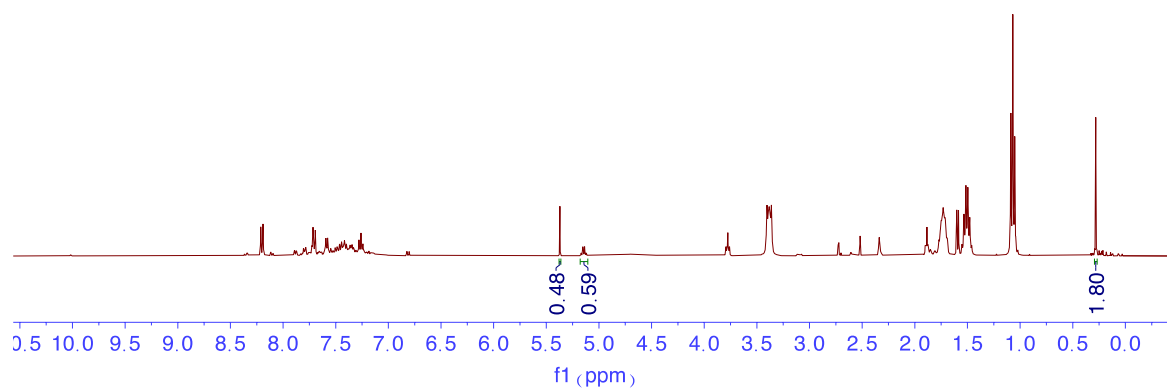

**Figure S80.**  $^1\text{H}$  NMR of organic product following a quench of the catalytic hydrosilylation reaction of 4- $\text{NO}_2$ -acetophenone with  $\text{Ph}_2\text{SiH}_2$  using **4** (5 mol%) in  $\text{CDCl}_3$  at 300K.

## 13b, 9-Fluorenone

t= 0.5h  
c= 80%

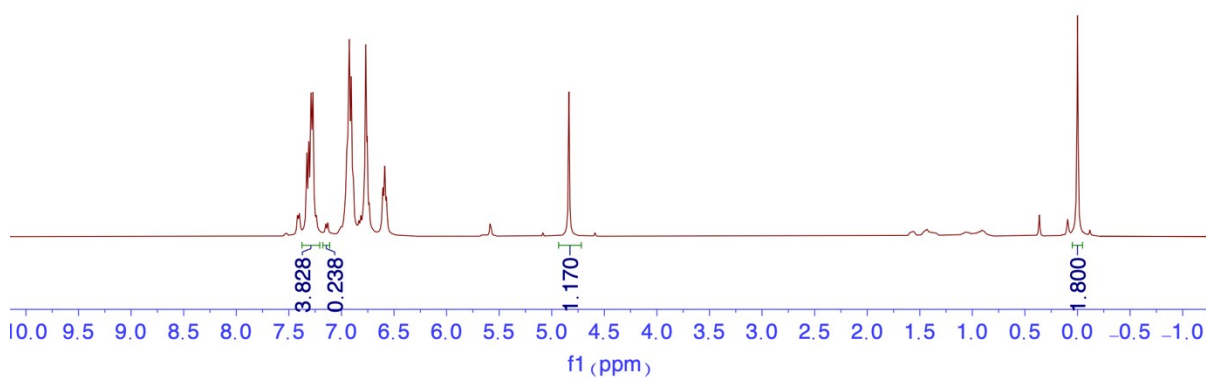

Before addition of **4** and Ph<sub>2</sub>SiH<sub>2</sub>

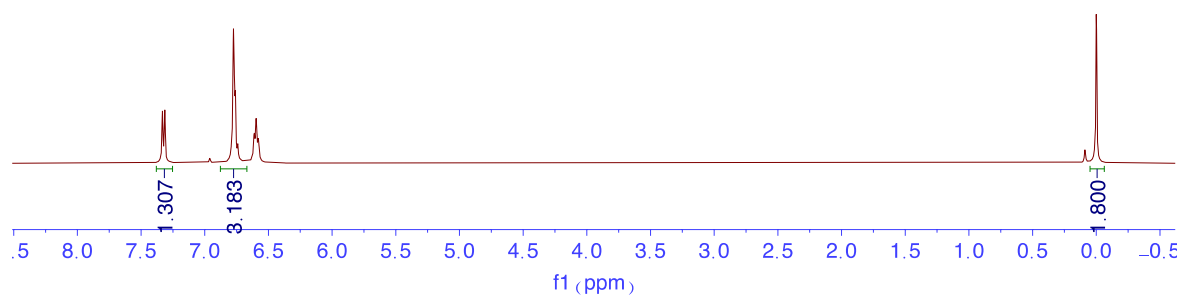

**Figure S81.** <sup>1</sup>H NMR overlay of catalytic hydrosilylation of 9-Fluorenone with Ph<sub>2</sub>SiH<sub>2</sub> using [Ag(IAd)HMDS] **4** (5 mol%) in C<sub>6</sub>D<sub>6</sub> at 300K

<sup>1</sup>H NMR (400.1 MHz, C<sub>6</sub>D<sub>6</sub>, 300K) δ 7.50-7.15 (6H, overlapping-Ar-H), 6.84 (9H, d, overlapping- Ar-H), 6.6 (2H, d, Ar-H), 5.68-5.55 (2H, Si-H and O-CH)

## 14b, Cyclopentanone

t= 22h  
c= <5%

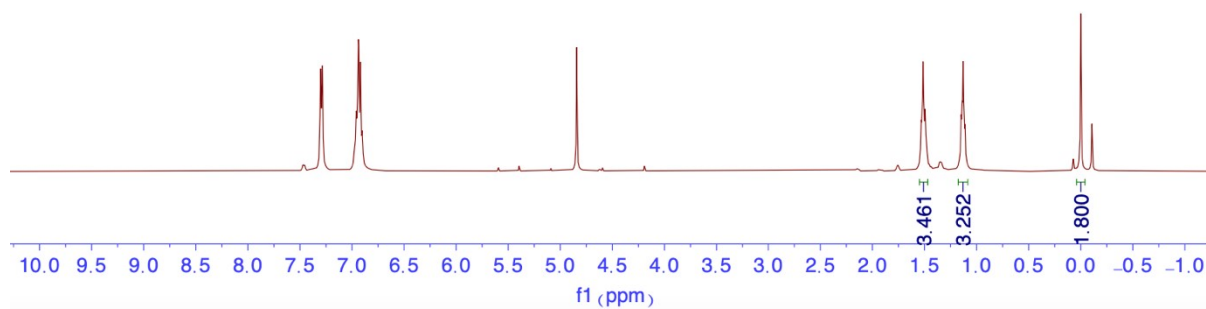

Before addition of **4** and Ph<sub>2</sub>SiH<sub>2</sub>

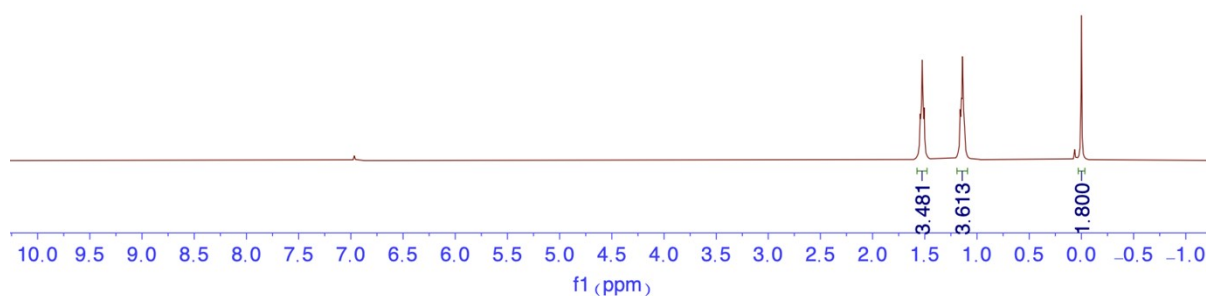

**Figure S82.** <sup>1</sup>H NMR overlay of catalytic hydrosilylation of cyclopentanone with Ph<sub>2</sub>SiH<sub>2</sub> using [Ag(IAd)HMDS] **4** (5 mol%) in C<sub>6</sub>D<sub>6</sub> at 300K

## Proposed catalytic cycle

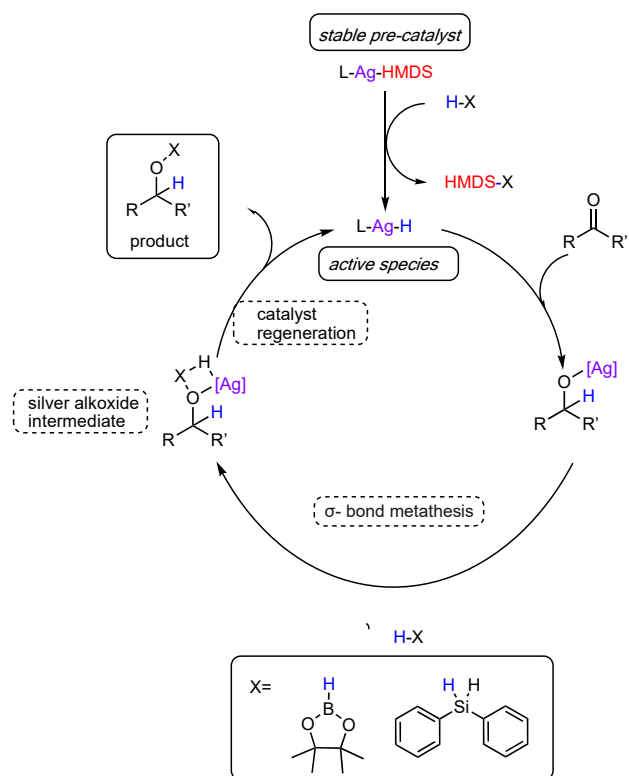

**Figure S83.** Proposed catalytic mechanism for the hydrofunctionalisation of carbonyls mediated by a silver(I) hydride intermediate

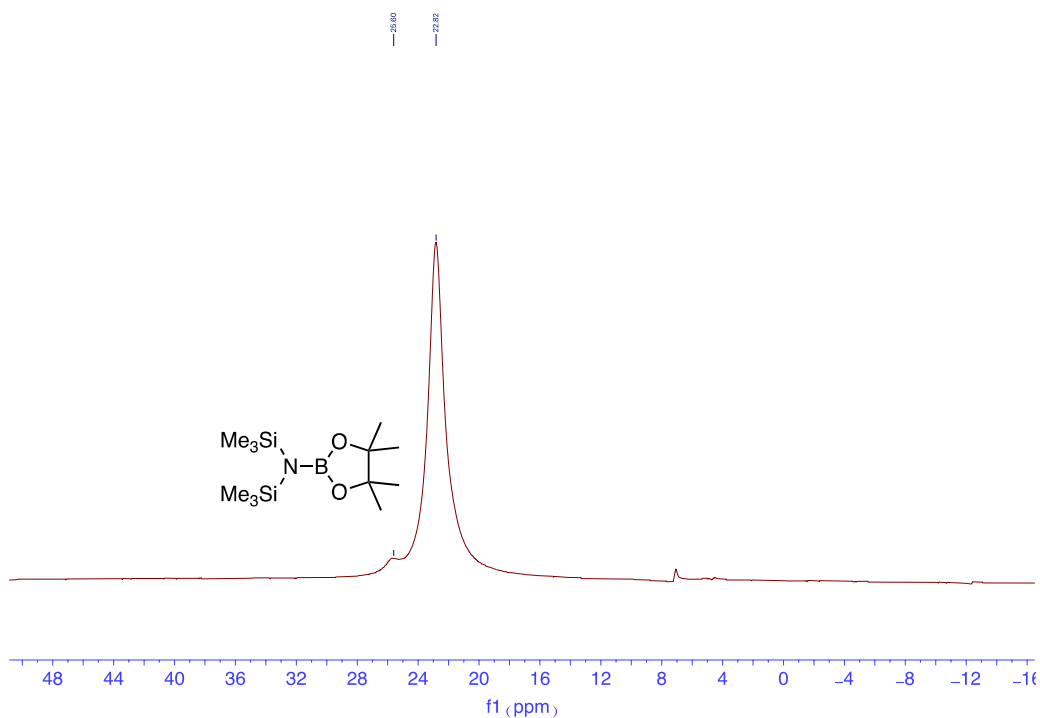

**Figure S84.** Proposed catalytic mechanism for the hydrofunctionalisation of carbonyls mediated by a silver(I) hydride intermediate

# Reusability studies of pre-catalyst 3

## General catalytic protocol for reusability study

In a typical procedure, the substrate benzaldehyde or 2,2,2-trifluoroacetophenone (0.5 mmol) was added to an amber J. Youngs NMR tube and dissolved in C<sub>6</sub>D<sub>6</sub> (0.5 mL) containing 10 mol % of the internal reference standard hexamethylcyclotrisiloxane and the <sup>1</sup>H NMR data recorded. Pinacolborane (0.6 mmol, 90 μL) or diphenylsilane (0.75 mmol, 93 μL) and lead pre-catalyst **3** (5 mol %, 1 M, 50 μL) was then added and the reaction monitored by <sup>1</sup>H NMR spectroscopy until completion and recorded as cycle 1. For cycles 2-5 an extra equivalent of substrate (0.5 mmol) and pinacolborane (0.6 mmol, 90 μL) or diphenylsilane (0.75 mmol, 93 μL) was added for each cycle, and percent (%) conversions were monitored <sup>1</sup>H NMR spectroscopy until completion, these values are recorded in table S6.

| Table S6. Reusability study of lead pre-catalyst [Ag(IDipp)HMDS] <b>3</b>           |       |               |                 |
|-------------------------------------------------------------------------------------|-------|---------------|-----------------|
| Substrate                                                                           | Cycle | Hydroboration | Hydrosilylation |
| 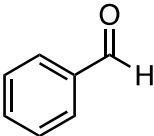 | 1     | 0.2h, 99%     | 0.25h, 95%      |
|                                                                                     | 2     | 0.2h, 99%     | 0.25h, 95%      |
|                                                                                     | 3     | 0.2h, 99%     | 0.8h, 98%       |
|                                                                                     | 4     | 0.25h, 99%    | 0.7h, 96%       |
|                                                                                     | 5     | 0.5h, 99%     | 2h, 93%         |
|  | 1     | 0.2h, 97%     | 0.2h, 93%       |
|                                                                                     | 2     | 0.2h, 97%     | 0.3h, 95%       |
|                                                                                     | 3     | 0.2h, 98%     | 0.5h, 99%       |
|                                                                                     | 4     | 0.6h, 94%     | 0.5h, 90%       |
|                                                                                     | 5     | 0.5h, 99%     | 0.5h, 89%       |

Five reusability cycles of pre-catalyst (**3**) for the hydroboration and hydrosilylation of benzaldehyde and 2,2,2-trifluoroacetophenone. % values indicate % conversions of starting material. Reaction conditions: substrate (1 mmol), Ph<sub>2</sub>SiH<sub>2</sub> or HBpin (1.5mmol), 5 mol% [Ag(IDipp)HMDS] (**3**) with 10 mol% internal standard hexamethylcyclotrisiloxane in C<sub>6</sub>D<sub>6</sub> at room temperature.



# Hydroboration reusability cycles

## Benzaldehyde

Before addition of **3** and HBpin

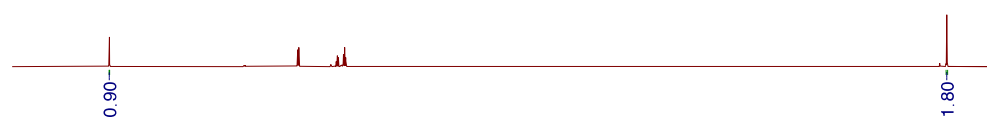

Cycle 1

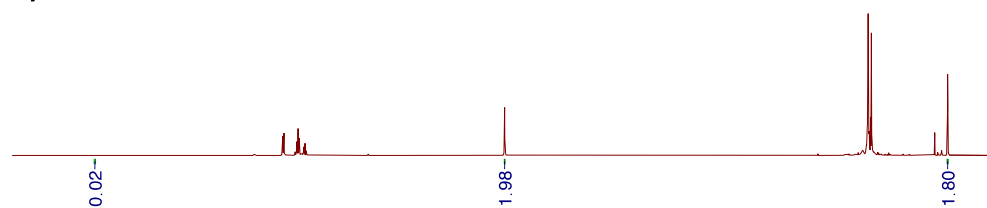

Cycle 2

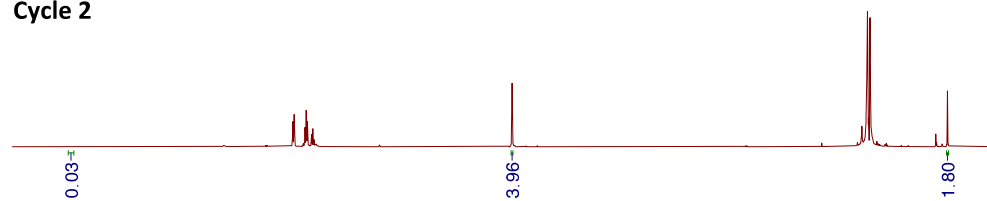

Cycle 3

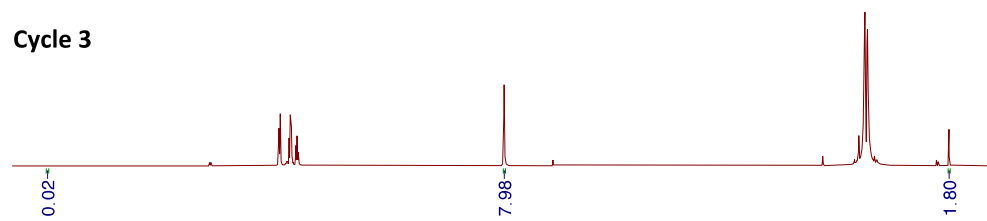

Cycle 4

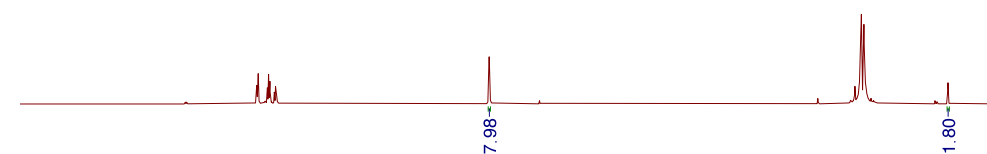

Cycle 5

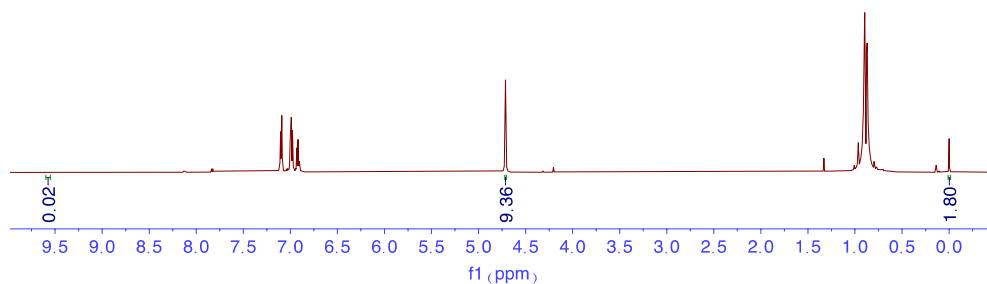

**Figure S85.**  $^1\text{H}$  NMR in  $\text{C}_6\text{D}_6$  with 10% mol IS overlay at 300K of five reusability cycles using **3** for the hydroboration of benzaldehyde

## 2,2,2-trifluoroacetophenone

Before addition of **3** and HBpin

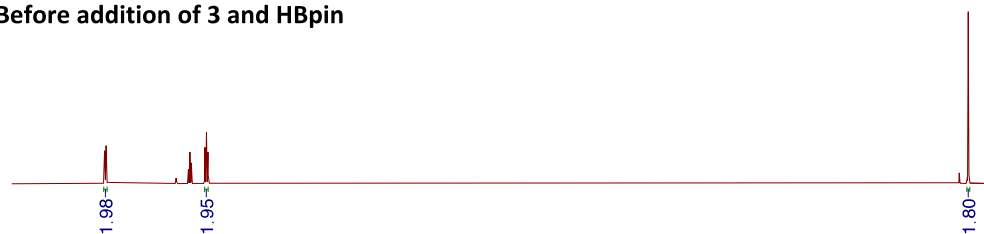

Cycle 1

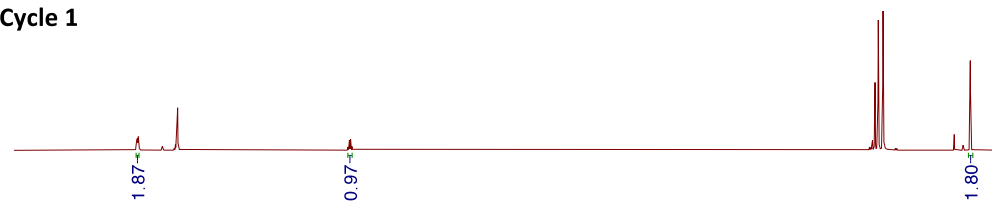

Cycle 2

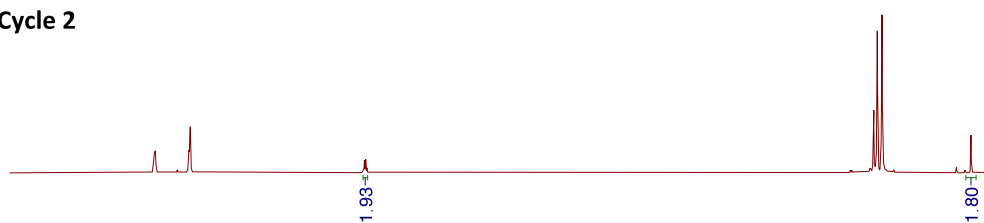

Cycle 3

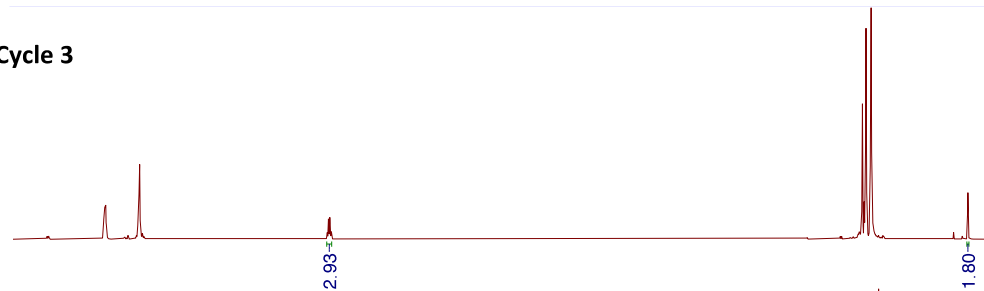

Cycle 4

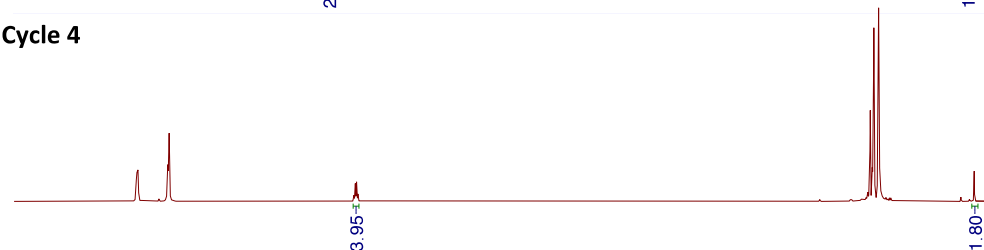

Cycle 5

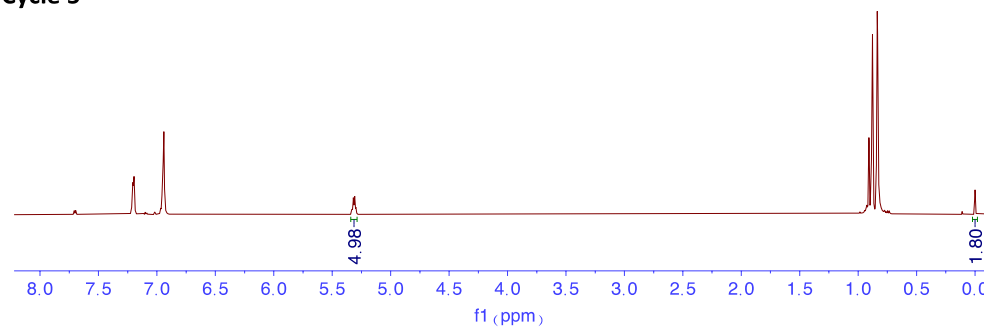

**Figure S86.**  $^1\text{H}$  NMR in  $\text{C}_6\text{D}_6$  with 10% mol IS overlay at 300K of five reusability cycles using **3** for the hydroboration 2,2,2-trifluoroacetophenone

# Hydrosilylation reusability cycles

## Benzaldehyde

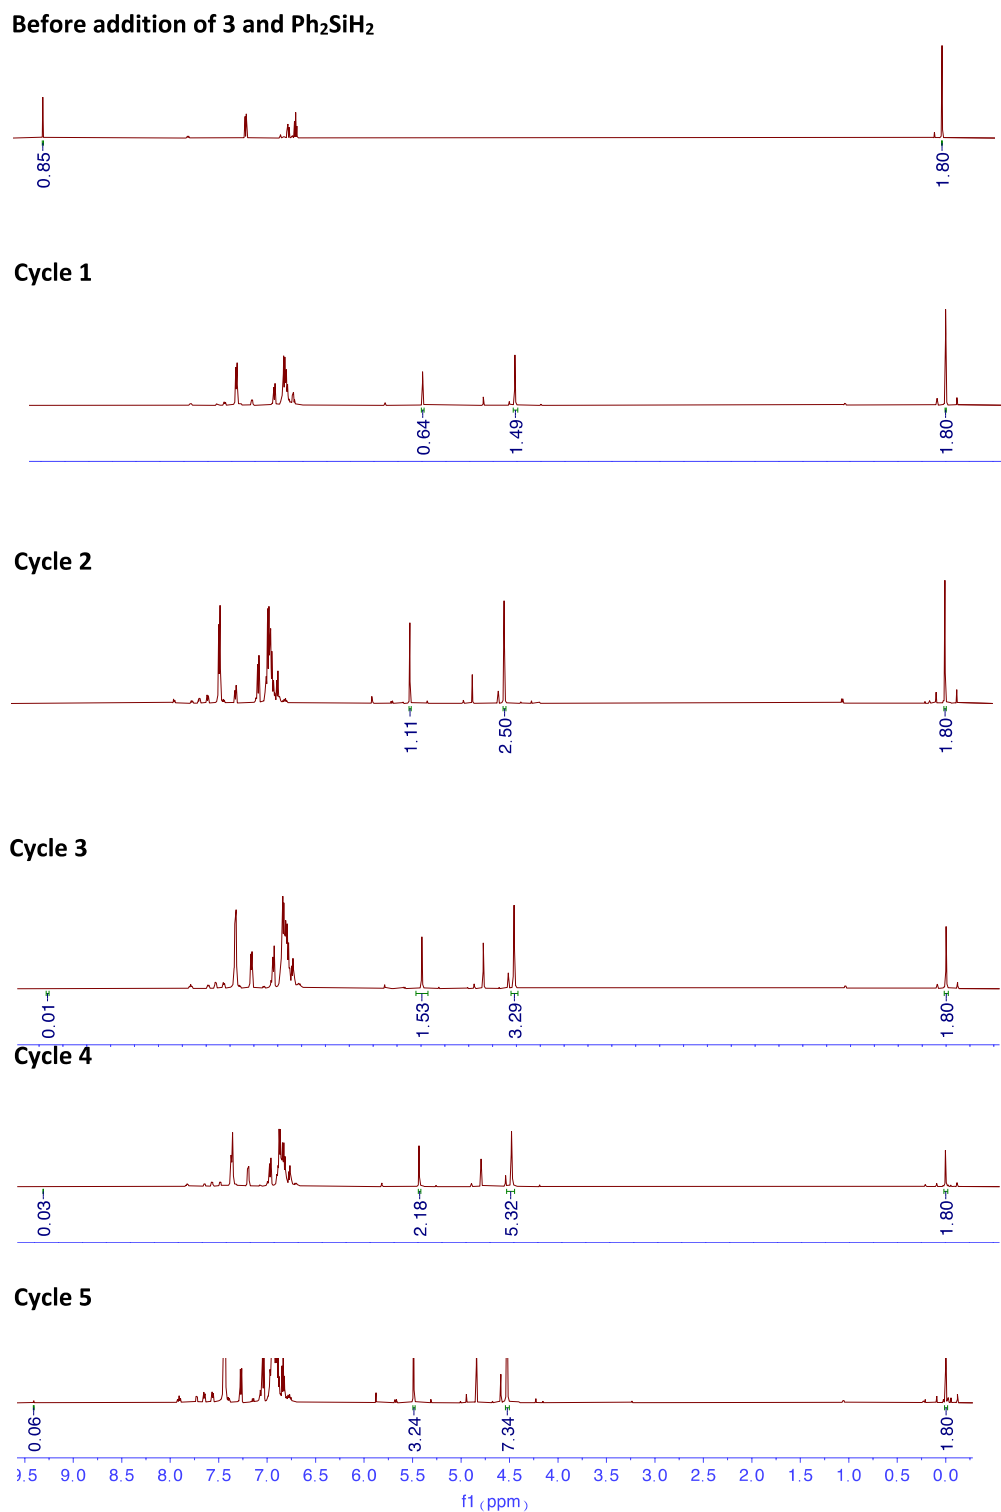

**Figure S87.** <sup>1</sup>H NMR in C<sub>6</sub>D<sub>6</sub> with 10% mol IS overlay at 300K of five reusability cycles using **3** for the hydrosilylation of benzaldehyde

## 2,2,2-trifluoroacetophenone

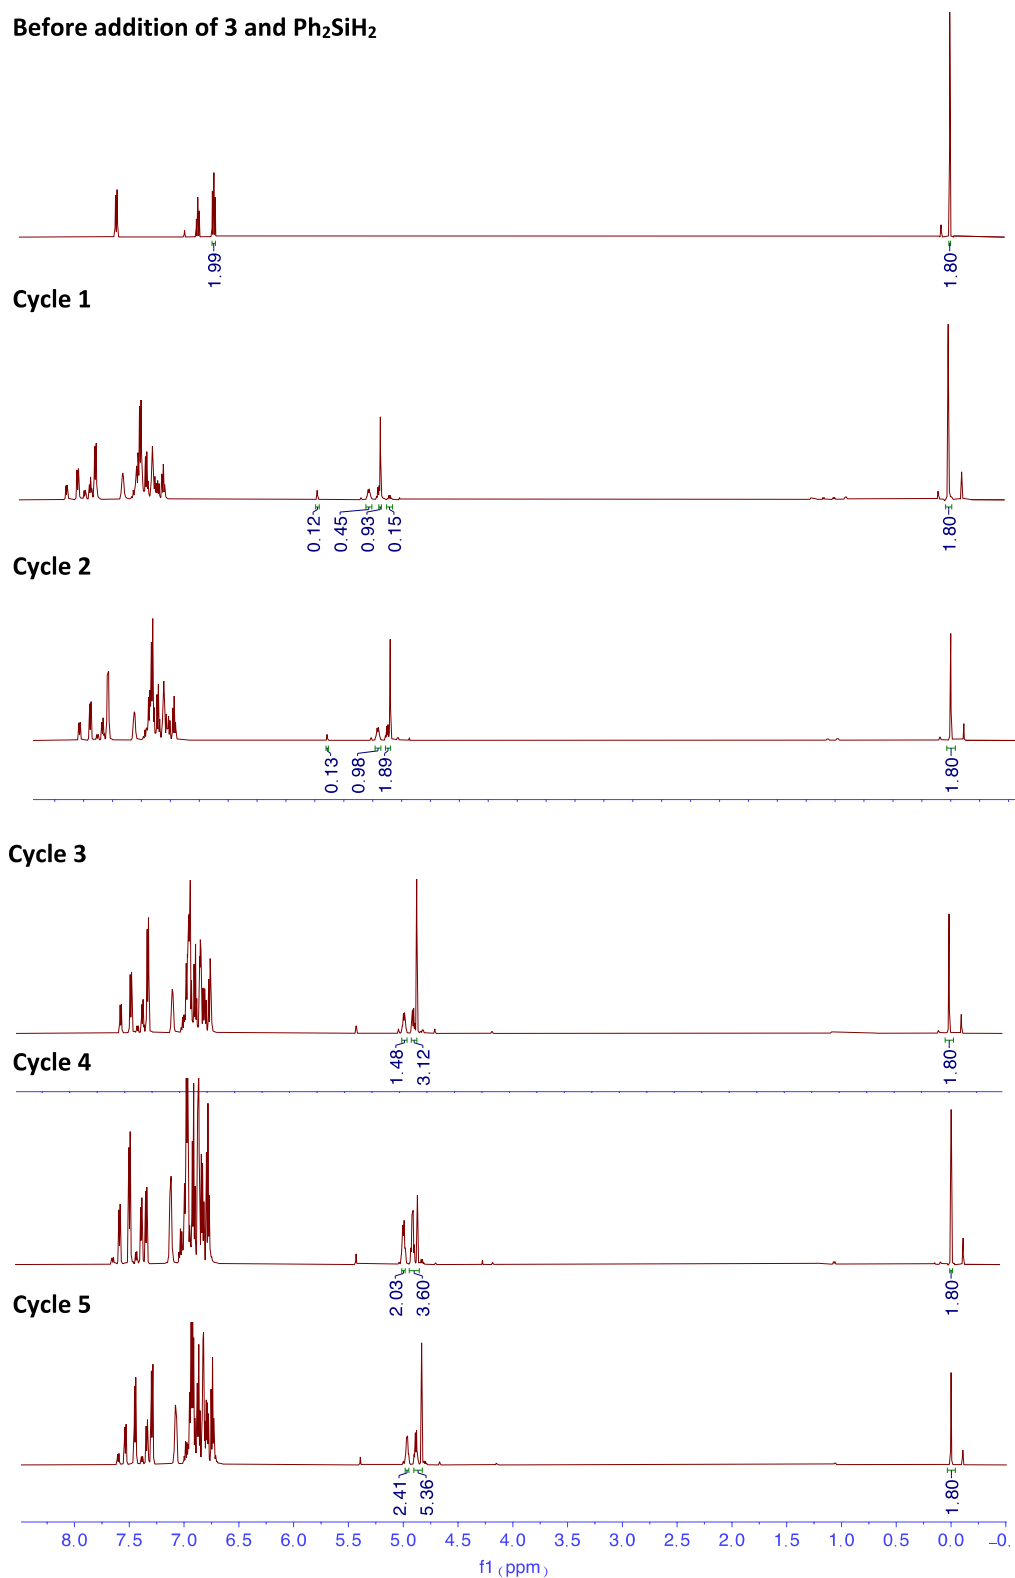

**Figure S88.** <sup>1</sup>H NMR in C<sub>6</sub>D<sub>6</sub> with 10% mol IS overlay at 300K of five reusability cycles using **3** for the hydrosilylation 2,2,2-trifluoroacetophenone

# Isolation of alcohol product from reusability study

The NMR reusability study solutions (see above), at the end of the five cycles was cooled to 0°C via an ice bath and 1.1 equivalents of TBAF (1.1 mL; 1 M solution in THF) was added drop wise and allowed to stir warming to room temperature. Next H<sub>2</sub>O (10 mL) was added, and the product extracted with Et<sub>2</sub>O (3 x 10 mL). The combined organics were washed with brine (15 mL), saturated NaHCO<sub>3</sub> and NH<sub>4</sub>Cl (5 x 5 mL) to remove residual TBAF and further dried with MgSO<sub>4</sub>. Solvent was removed *in vacuo*. For model substrate benzaldehyde the isolated product resulting from the hydroboration was collected as a pale-yellow oil (0.099 g, yield: 37%) Figure S89 and for the hydrosilylation as a pale-yellow oil (0.222 g, yield: 82%) figure S90.

Following the same procedure for substrate 2,2,2-trifluoroacetophenone, lead to difficulties in pure isolation of the corresponding alcohol product, with residual TBAF remaining, even after attempted purification via column chromatography, or washing with NH<sub>4</sub>Cl and or NaHCO<sub>3</sub> multiple times.

Benzaldehyde, HBpin:

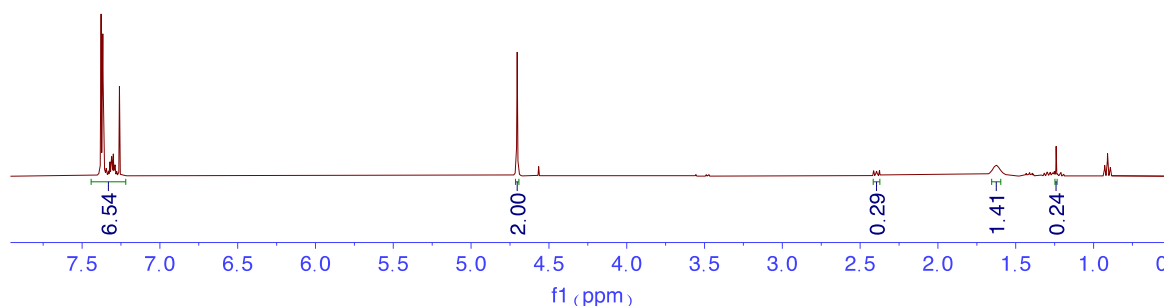

Figure S89. <sup>1</sup>H NMR (400 MHz, CDCl<sub>3</sub>): 7.22-7.40 (m, 6H), 4.70 (s, 2H), 1.62 (s, 1H) ppm.

Benzaldehyde, Ph<sub>2</sub>SiH<sub>2</sub>:

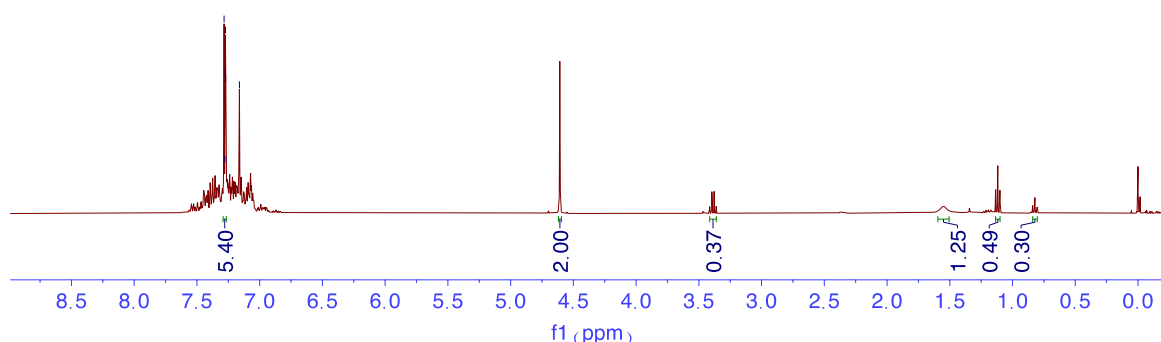

Figure S90. <sup>1</sup>H NMR (400 MHz, CDCl<sub>3</sub>): 7.08-7.42 (m, 6H), 4.60 (s, 2H), 1.57 (s, 1H, OH) ppm.

## 2D steric mapping

### Percent buried volume ( $\%V_{\text{Bur}}$ )

The percent buried volume ( $\%V_{\text{Bur}}$ ) and topographical steric maps presented herein were calculated via the SambVca 2.1 web tool.<sup>6,7</sup> The radius of the sphere around the silver metal centre was set to 3.5 Å, whereas for the atoms we adopted the Bondi radii scaled by 1.17, and a mesh spacing of 0.10 Å was used to scan the sphere for buried voxels.<sup>6,7</sup>

### [Ag(IDipp)HMDS] 3

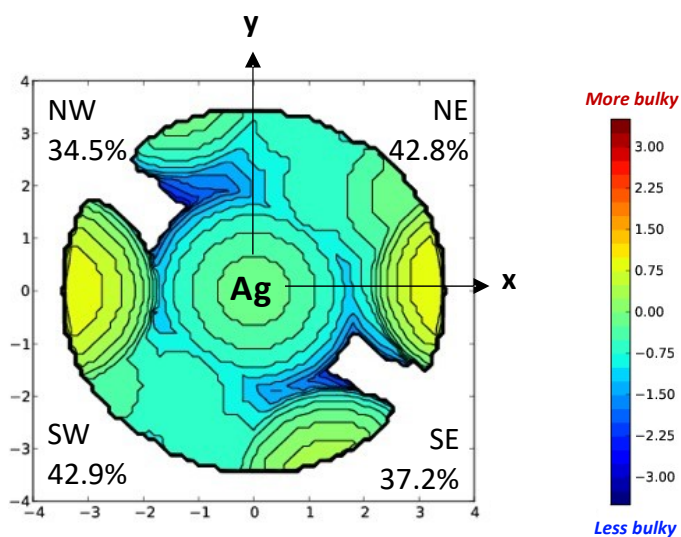

**Figure S91.** SambVca 2 calculated  $\%V_{\text{Bur}}$  of 39.4% for [Ag(IDipp)HMDS] 3 represented by topographical steric maps including the  $\%V_{\text{Bur}}$  of each quadrant NW, NE, SW and SE.

### [Ag(IAd)HMDS] 4

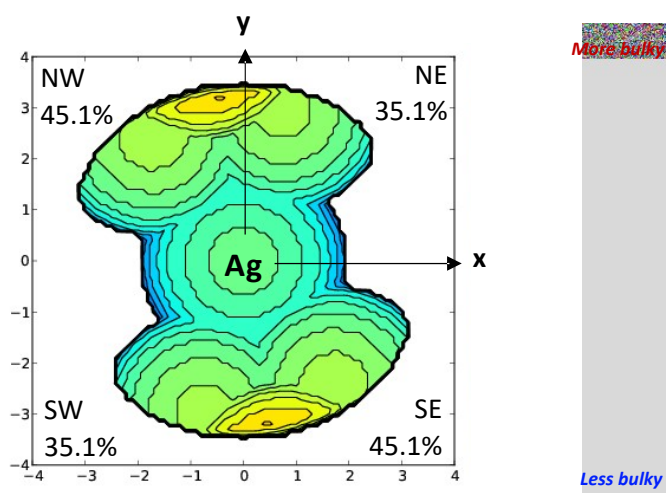

**Figure S92.** SambVca 2 calculated %V<sub>Bur</sub> of 40.1% for [Ag(IAd)HMDS] 4 represented by topographical steric maps including the %V<sub>Bur</sub> of each quadrant NW, NE, SW and SE.

### [Ag(PCy<sub>3</sub>)HMDS] 5

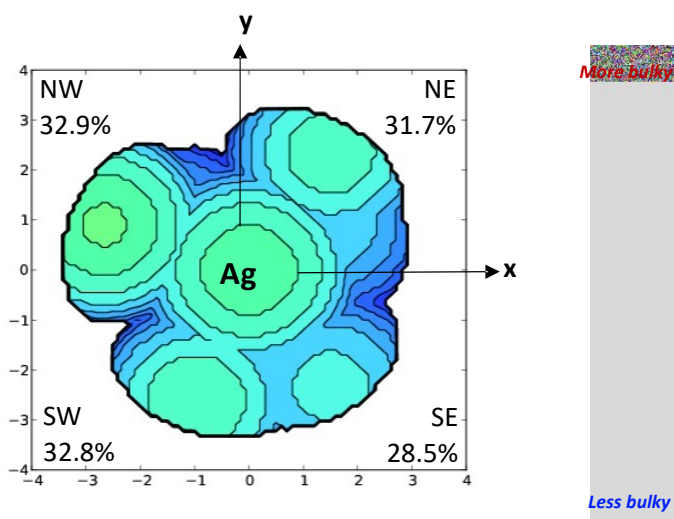

**Figure S93.** SambVca 2 calculated %V<sub>Bur</sub> of 31.5% for [Ag(PCy<sub>3</sub>)HMDS] 5 represented by topographical steric maps including the %V<sub>Bur</sub> of each quadrant NW, NE, SW and SE

## 3D steric mapping

### *AtomAccess*

Ray tracing of the accessible sites to the metal centre was performed on the *AtomAccess* program.<sup>8,9</sup> The parameters utilised for the calculations are described in the *AtomAccess* manual,<sup>9</sup> where radial cut off defined as  $r_{\text{max}}$  is set to the default value of 5Å to account for the whole molecule. Finally, density was set to the default value of 10 as this provides a balance between precise values and accurate clustering.<sup>9</sup>

### [Ag(IDipp)HMDS] **3**

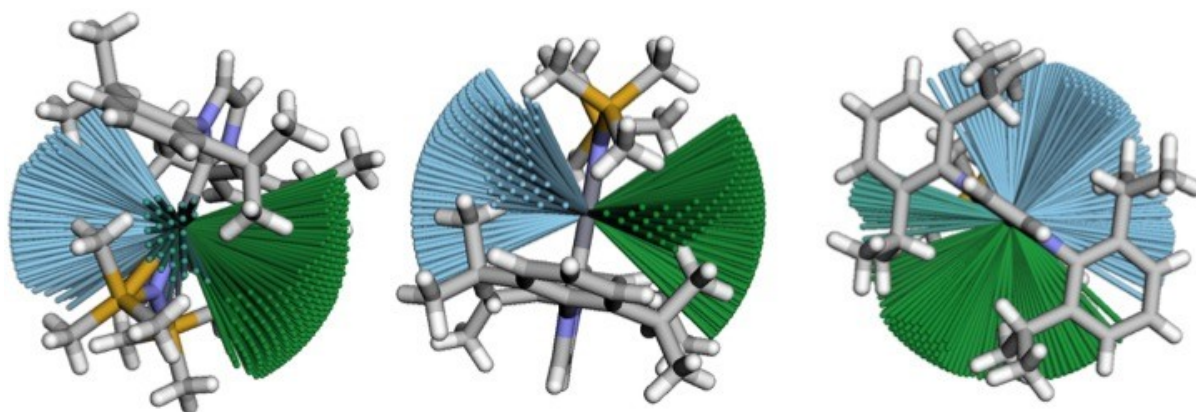

**Figure S94.** *AtomAccess* ray tracing of accessible sites to silver centre for [Ag(IDipp)HMDS] **3** using the atomic coordinates from the SCXRD dataset. Ray tracing obtained for **3**: Largest cluster: light blue (11.0%); minor clusters: green (9.0%) and teal (1.1%).

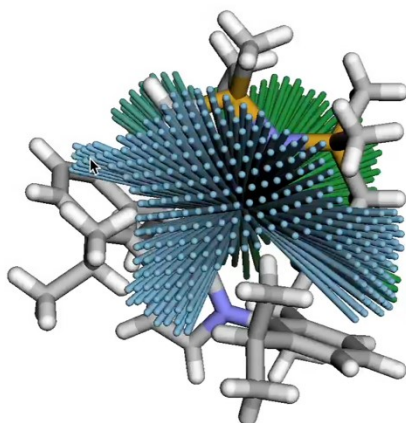

**Video 1.** Rotational video of the ray tracing of accessible sites to silver for **3**



[Ag(IAd)HMDS] **4**

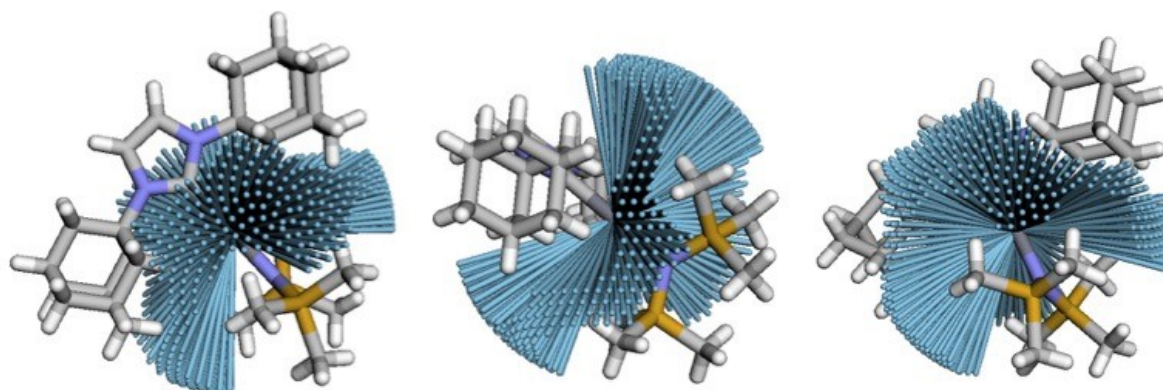

**Figure S95.** *AtomAccess* ray tracing of accessible sites to silver centre for [Ag(IAd)HMDS] **4** using the atomic coordinates from the SCXRD dataset. Ray tracing obtained for **4**: Largest cluster: light blue (22.6%).

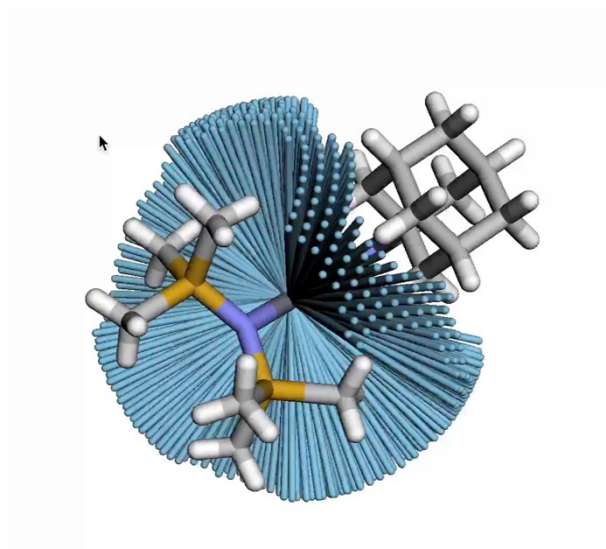

**Video 2.** Rotational video of the ray tracing of accessible sites to silver for **4**

## G-parameter

The solid G-angles for complexes **3-5** were calculated using the Solid-G web program.<sup>10</sup> The parameters utilised for the solid G-angle calculation includes  $G_M$  and  $G_{2.28}$ . The  $G_M$  depicts experimental values for the metal-carbene (M-C) distance calculated from the crystal structures of complexes **3-5**. The  $G_{2.28}$  depicts the M-C normalised bond distance of 2.28 Å. Figure S89 depicts the solid angle (blue shading on the red sphere) for complexes **3-5** respectively.

| Table S7. Calculated steric differences between complexes <b>3-5</b> calculated using % $V_{Bur}$ and solid angle measurements (G-values) |                            |                            |                      |                           |
|-------------------------------------------------------------------------------------------------------------------------------------------|----------------------------|----------------------------|----------------------|---------------------------|
| Complex                                                                                                                                   | % $V_{Bur}$ <sup>[a]</sup> | % $V_{Bur}$ <sup>[b]</sup> | $G_M$ <sup>[b]</sup> | $G_{2.28}$ <sup>[c]</sup> |
| [Ag(IDipp)HMDS] <b>3</b>                                                                                                                  | 39.4                       | 35.5                       | 43.9                 | 41.4                      |
| [Ag(IAd)HMDS] <b>4</b>                                                                                                                    | 40.1                       | 36.9                       | 40.3                 | 37.1                      |
| [Ag(PCy <sub>3</sub> )HMDS] <b>5</b>                                                                                                      | 31.5                       | 32.8                       | 31.0                 | 31.9                      |

% $V_{Bur}$  calculated using SambVca 2.1,<sup>39</sup>see ESI for details. Solid angle measurements (G-values) were calculated using Solid-G.<sup>54</sup> [a] % $V_{Bur}$  was calculated using the M-C distances from the crystal structures of complexes **3-5**. [b] G-values were calculated using the M-C distances from the crystal structures of complexes **3-5**. [c] G-values were calculated using a normalised bond distance of 2.28 Å between M-C for complexes **3-5**.

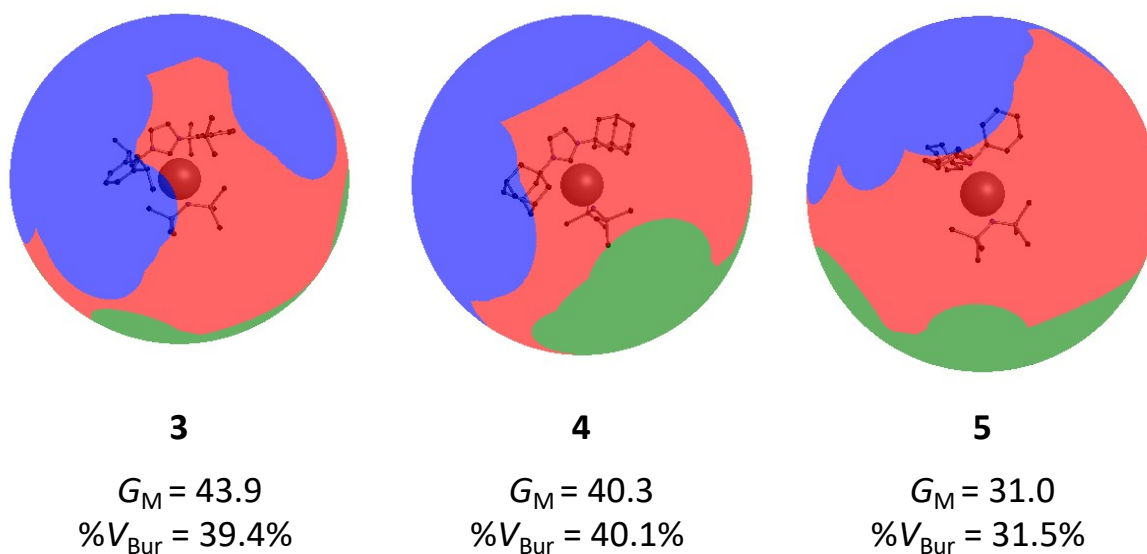

**Figure S96.** Representation of the solid angle for complexes **3-5** using solid G-angles, for **3**  $G_M = 43.9$ , **4**  $G_M = 40.3$  and **5**  $G_M = 31.0$ .

## References

1. CrysAlisPro, version 1.171.34.36, Oxford Diffraction Ltd.: Oxford, UK, 2010.
2. O. V. Dolomanov, L. J. Bourhis, R. J. Gildea, J. A. Howard and H. Puschmann, *Journal of applied crystallography*, 2009, **42**, 339-341.
3. G. M. Sheldrick, *Acta Crystallographica Section A: Foundations of Crystallography*, 2008, **64**, 112-122.
4. P. de Frémont, N. M. Scott, E. D. Stevens, T. Ramnial, O. C. Lightbody, C. L. B. Macdonald, J. A. C. Clyburne, C. D. Abernethy and S. P. Nolan, *Organometallics*, 2005, **24**, 6301-6309.
5. Y. Miyazaki, Y. Yamada, Y. Nakao and T. Hiyama, *Chemistry Letters*, 2012, **41**, 298-300.
6. L. Falivene, R. Credendino, A. Poater, A. Petta, L. Serra, R. Oliva, V. Scarano and L. Cavallo, *Organometallics*, 2016, **35**, 2286-2293.
7. L. Falivene, Z. Cao, A. Petta, L. Serra, A. Poater, R. Oliva, V. Scarano and L. Cavallo, *Nature Chemistry*, 2019, **11**, 872-879.
8. S. C. G. Gransbury, J. Kragoskow, P. Evans, H. Yeung, W. Blackmore, G. Whitehead, I. Vitorica-Yrezabal, N. Chilton and D. Mills, , 2022.
9. G. K. K. Gransbury, J. G. C.; Chilton, N. F. , 2023.
10. I. A. Guzei and M. Wendt, *Dalton Transactions*, 2006, DOI: 10.1039/B605102B, 3991-3999.
